# Supplementary material for: Anaerobic fungi in the tortoise alimentary tract illuminate early stages of host-fungal symbiosis and Neocallimastigomycota evolution
Source: bioRxiv preprint, doi:10.1101/2023.08.25.554870, version 1 (2023-08-26)
Supplement: Dataset4 [file 554870_file05.xlsx]

## Sheet: Sheet1
Dataset 4. Mass spectrometry results. Proteins identified in MS are shown for each strain along with the predicted function using KEGG, Conserved Domain Database, and dbcan4. Also shown are the intensities of each peptide in the biomass and cellulose bound fraction as well as the ratio of intensity in cellulose-bound fraction to the intensity in the biomass fraction.
Protein name	KO	Function	KEGG Classification Tier 1	KEGG Classification Tier 2	KEGG Classification Tier 3	CBM10 (Conserved domain database)	dbcan4 prediction	Conserved domain database, other domains	Intensity in the biomass fraction	Intensity in the cellulose-bound fraction	Ratio (Cellulose-bound: Biomass)
Strain B1.1
B1.1_TRINITY_DN0_c0_g1_i1.p1									1423420000	1.92521e+09	1.35252
B1.1_TRINITY_DN0_c0_g1_i2.p1									18644500	145784000	7.81914
B1.1_TRINITY_DN0_c0_g1_i3.p1									9477600	32700400	3.45028
B1.1_TRINITY_DN0_c0_g1_i4.p1									122310000	392210000	3.20669
B1.1_TRINITY_DN0_c2_g1_i1.p1	K01179	E3.2.1.4; endoglucanase [EC:3.2.1.4]	K09100 Metabolism	K09101 Carbohydrate metabolism	K00500 Starch and sucrose metabolism [PATH:ko00500]	CBM_10	GH5	Cellulase	20724600	1170000000	56.4546
B1.1_TRINITY_DN0_c2_g1_i11.p1	K01179	E3.2.1.4; endoglucanase [EC:3.2.1.4]	K09100 Metabolism	K09101 Carbohydrate metabolism	K00500 Starch and sucrose metabolism [PATH:ko00500]		GH5	Cellulase	0	13494000
B1.1_TRINITY_DN0_c2_g1_i6.p1						CBM_10		CBM29_CBM65	0	110552600
B1.1_TRINITY_DN0_c2_g2_i1.p1	K01179	E3.2.1.4; endoglucanase [EC:3.2.1.4]	K09100 Metabolism	K09101 Carbohydrate metabolism	K00500 Starch and sucrose metabolism [PATH:ko00500]				0	245989300
B1.1_TRINITY_DN0_c5_g1_i1.p1	K01179	E3.2.1.4; endoglucanase [EC:3.2.1.4]	K09100 Metabolism	K09101 Carbohydrate metabolism	K00500 Starch and sucrose metabolism [PATH:ko00500]		GH5_5	Cellulase	0	626489000
B1.1_TRINITY_DN1_c0_g1_i1.p1	K04079	HSP90A, htpG; molecular chaperone HtpG	K09120 Genetic Information Processing	K09123 Folding, sorting and degradation	K04141 Protein processing in endoplasmic reticulum [PATH:ko04141]			PTZ00272	211396000	11646000	0.0550909
B1.1_TRINITY_DN1_c0_g2_i1.p1	K04079	HSP90A, htpG; molecular chaperone HtpG	K09120 Genetic Information Processing	K09123 Folding, sorting and degradation	K04141 Protein processing in endoplasmic reticulum [PATH:ko04141]			PTZ00272	5602800000	547910000	0.0977922
B1.1_TRINITY_DN10004_c0_g2_i2.p1	K13179	DDX18, HAS1; ATP-dependent RNA helicase DDX18/HAS1 [EC:3.6.4.13]	K09180 Brite Hierarchies	K09182 Protein families: genetic information processing	K03041 Spliceosome [BR:ko03041]			DEADc_DDX18	5152670	0	0
B1.1_TRINITY_DN10012_c0_g1_i4.p1	K17605	PPP2R4, PTPA; serine/threonine-protein phosphatase 2A activator	K09160 Human Diseases	K09166 Cardiovascular disease				PTPA	2238700	0	0
B1.1_TRINITY_DN10022_c1_g1_i5.p1	K10416	DYNC1LI, DNCLI; dynein cytoplasmic 1 light intermediate chain	K09140 Cellular Processes	K09141 Transport and catabolism	K04145 Phagosome [PATH:ko04145]			DLIC	7474800	0	0
B1.1_TRINITY_DN1003_c0_g1_i4.p1	K10356	MYO1; myosin I	K09160 Human Diseases	K09171 Infectious disease: bacterial	K05130 Pathogenic Escherichia coli infection [PATH:ko05130]			Myosin_TH1	3224700	0	0
B1.1_TRINITY_DN1003_c2_g1_i2.p1									2396200	0	0
B1.1_TRINITY_DN10033_c0_g3_i1.p1	K05302	SETD6; N-lysine methyltransferase SETD6 [EC:2.1.1.-]	K09180 Brite Hierarchies	K09182 Protein families: genetic information processing	K03036 Chromosome and associated proteins [BR:ko03036]			SET_SETD6	2562600	0	0
B1.1_TRINITY_DN1006_c0_g1_i4.p1	K01613	psd, PISD; phosphatidylserine decarboxylase [EC:4.1.1.65]	K09100 Metabolism	K09103 Lipid metabolism	K00564 Glycerophospholipid metabolism [PATH:ko00564]			PLN02964	27861000	0	0
B1.1_TRINITY_DN10078_c7_g1_i1.p1									242018000	465949000	1.92527
B1.1_TRINITY_DN10079_c2_g1_i1.p1	K00134	GAPDH, gapA; glyceraldehyde 3-phosphate dehydrogenase (phosphorylating) [EC:1.2.1.12]	K09100 Metabolism	K09101 Carbohydrate metabolism	K00010 Glycolysis / Gluconeogenesis [PATH:ko00010]			PLN02272	560420000	89154000	0.159084
B1.1_TRINITY_DN10088_c0_g1_i2.p1									3481200	7224300	2.07523
B1.1_TRINITY_DN1010_c0_g1_i3.p1	K14835	NOP2; 25S rRNA (cytosine2870-C5)-methyltransferase [EC:2.1.1.310]	K09180 Brite Hierarchies	K09182 Protein families: genetic information processing	K03009 Ribosome biogenesis [BR:ko03009]			nop2p	21289700	0	0
B1.1_TRINITY_DN10106_c0_g1_i1.p1	K22068	ISCU; iron-sulfur cluster assembly enzyme ISCU, mitochondrial	K09180 Brite Hierarchies	K09182 Protein families: genetic information processing	K03029 Mitochondrial biogenesis [BR:ko03029]			iscU	68875000	3043800	0.0441931
B1.1_TRINITY_DN1011_c0_g1_i4.p1									3173700	2638600	0.831396
B1.1_TRINITY_DN1011_c0_g1_i8.p2									0	1709900
B1.1_TRINITY_DN10132_c0_g2_i1.p1									5138100	0	0
B1.1_TRINITY_DN10141_c0_g2_i1.p1									16542600	0	0
B1.1_TRINITY_DN10155_c0_g1_i3.p1	K08793	STK32, YANK; serine/threonine kinase 32 [EC:2.7.11.1]	K09180 Brite Hierarchies	K09181 Protein families: metabolism	K01001 Protein kinases [BR:ko01001]			STKc_Yank1	3189800	0	0
B1.1_TRINITY_DN10155_c1_g1_i1.p1									0	11511600
B1.1_TRINITY_DN10168_c1_g2_i2.p1	K14847	RPF2; ribosome production factor 2	K09180 Brite Hierarchies	K09182 Protein families: genetic information processing	K03009 Ribosome biogenesis [BR:ko03009]			RPF2	12960600	0	0
B1.1_TRINITY_DN10171_c0_g3_i1.p1	K06238	COL6A; collagen type VI alpha	K09130 Environmental Information Processing	K09132 Signal transduction	K04151 PI3K-Akt signaling pathway [PATH:ko04151]				4268200	34106200	7.99077
B1.1_TRINITY_DN10176_c0_g1_i1.p1	K12392	AP1B1; AP-1 complex subunit beta-1	K09140 Cellular Processes	K09141 Transport and catabolism	K04142 Lysosome [PATH:ko04142]			Alpha_adaptinC2	30413000	17479400	0.574734
B1.1_TRINITY_DN1019_c0_g1_i3.p1	K11593	ELF2C, AGO; eukaryotic translation initiation factor 2C	K09150 Organismal Systems	K09158 Development and regeneration				Piwi_ago-like	136264000	16465500	0.120835
B1.1_TRINITY_DN1019_c0_g1_i4.p2	K11593	ELF2C, AGO; eukaryotic translation initiation factor 2C	K09150 Organismal Systems	K09158 Development and regeneration				Piwi_ago-like	16972500	0	0
B1.1_TRINITY_DN1019_c0_g1_i5.p1	K11593	ELF2C, AGO; eukaryotic translation initiation factor 2C	K09150 Organismal Systems	K09158 Development and regeneration				PLN03202	14393800	2391200	0.166127
B1.1_TRINITY_DN1019_c0_g1_i7.p1	K11593	ELF2C, AGO; eukaryotic translation initiation factor 2C	K09150 Organismal Systems	K09158 Development and regeneration				Piwi_ago-like	203270000	55946700	0.275233
B1.1_TRINITY_DN10197_c2_g1_i1.p1								Mannosyl_trans3	1057490	0	0
B1.1_TRINITY_DN10207_c0_g1_i1.p1								DUF866	14922600	0	0
B1.1_TRINITY_DN1021_c1_g1_i1.p1	K11517	HAO; (S)-2-hydroxy-acid oxidase [EC:1.1.3.15]	K09100 Metabolism	K09101 Carbohydrate metabolism	K00630 Glyoxylate and dicarboxylate metabolism [PATH:ko00630]			FMN_dh	14721900	0	0
B1.1_TRINITY_DN1021_c2_g1_i3.p1								GST_C_3	21947200	0	0
B1.1_TRINITY_DN10210_c3_g2_i2.p1								Annexin	0	3311500
B1.1_TRINITY_DN10224_c3_g2_i1.p1									7536700	0	0
B1.1_TRINITY_DN10226_c0_g1_i3.p1									32871000	0	0
B1.1_TRINITY_DN10236_c1_g1_i2.p1	K04077	groEL, HSPD1; chaperonin GroEL	K09120 Genetic Information Processing	K09123 Folding, sorting and degradation	K03018 RNA degradation [PATH:ko03018]			GroEL	497890000	34635000	0.0695636
B1.1_TRINITY_DN10237_c0_g1_i3.p1	K06927	DPH6; diphthine-ammonia ligase [EC:6.3.1.14]	K09180 Brite Hierarchies	K09182 Protein families: genetic information processing	K03012 Translation factors [BR:ko03012]			Alpha_ANH_like_IV	6039900	0	0
B1.1_TRINITY_DN10241_c0_g2_i2.p1	K12405	HSD17B4; (3R)-3-hydroxyacyl-CoA dehydrogenase / 3a,7a,12a-trihydroxy-5b-cholest-24-enoyl-CoA hydratase / enoyl-CoA hydratase 2 [EC:1.1.1.- 4.2.1.107 4.2.1.119]	K09100 Metabolism	K09103 Lipid metabolism	K00120 Primary bile acid biosynthesis [PATH:ko00120]			SCP2	21336300	0	0
B1.1_TRINITY_DN10249_c0_g2_i2.p1								PDI_a_family	62907000	0	0
B1.1_TRINITY_DN10258_c1_g1_i2.p1									1296100	34011000	26.241
B1.1_TRINITY_DN1028_c4_g1_i1.p1									1279170	0	0
B1.1_TRINITY_DN10288_c0_g1_i1.p1									0	25796700
B1.1_TRINITY_DN10298_c0_g1_i2.p1	K20300	TRAPPC1, BET5; trafficking protein particle complex subunit 1	K09180 Brite Hierarchies	K09182 Protein families: genetic information processing	K04131 Membrane trafficking [BR:ko04131]			TRAPPC1_MUM2	25800000	0	0
B1.1_TRINITY_DN103_c1_g1_i2.p1	K00600	glyA, SHMT; glycine hydroxymethyltransferase [EC:2.1.2.1]	K09100 Metabolism	K09101 Carbohydrate metabolism	K00630 Glyoxylate and dicarboxylate metabolism [PATH:ko00630]			PLN03226	6.649e+09	1618570000	0.243431
B1.1_TRINITY_DN10302_c0_g1_i5.p1	K02971	RP-S21e, RPS21; small subunit ribosomal protein S21e	K09120 Genetic Information Processing	K09122 Translation	K03010 Ribosome [PATH:ko03010]			Ribosomal_S21e	558120000	105054000	0.188228
B1.1_TRINITY_DN10311_c0_g1_i2.p1	K00700	GBE1, glgB; 1,4-alpha-glucan branching enzyme [EC:2.4.1.18]	K09100 Metabolism	K09101 Carbohydrate metabolism	K00500 Starch and sucrose metabolism [PATH:ko00500]			PLN02447	36204000	15701800	0.433703
B1.1_TRINITY_DN10315_c0_g1_i2.p1									1992400	0	0
B1.1_TRINITY_DN10322_c2_g1_i1.p1									1926000	0	0
B1.1_TRINITY_DN10326_c0_g1_i11.p1	K02328	POLD2; DNA polymerase delta subunit 2	K09120 Genetic Information Processing	K09124 Replication and repair	K03030 DNA replication [PATH:ko03030]			MPP_PolD2_C	2872300	0	0
B1.1_TRINITY_DN10329_c0_g1_i2.p1								RPE65	110312000	2975200	0.0269708
B1.1_TRINITY_DN10339_c0_g1_i1.p1									0	4104500
B1.1_TRINITY_DN10339_c2_g1_i1.p1								E1_DerP2_DerF2	0	7740700
B1.1_TRINITY_DN1034_c0_g1_i6.p1	K04630	GNAI; guanine nucleotide-binding protein G(i) subunit alpha	K09130 Environmental Information Processing	K09132 Signal transduction	K04015 Rap1 signaling pathway [PATH:ko04015]			G-alpha	5320800	1941700	0.364926
B1.1_TRINITY_DN1034_c0_g6_i2.p1									11563000	0	0
B1.1_TRINITY_DN10354_c0_g2_i2.p1									44641000	0	0
B1.1_TRINITY_DN1036_c1_g1_i4.p1								SET_LegAS4-like	120582000	0	0
B1.1_TRINITY_DN1036_c3_g1_i1.p1	K00728	POMT, pmt; dolichyl-phosphate-mannose-protein mannosyltransferase [EC:2.4.1.109]	K09100 Metabolism	K09107 Glycan biosynthesis and metabolism	K00515 Mannose type O-glycan biosynthesis [PATH:ko00515]			PMT1	15358700	0	0
B1.1_TRINITY_DN10360_c0_g1_i1.p1	K17302	COPB2, SEC27; coatomer subunit beta'	K09180 Brite Hierarchies	K09182 Protein families: genetic information processing	K04131 Membrane trafficking [BR:ko04131]			Coatomer_WDAD_beta-like	6165900	0	0
B1.1_TRINITY_DN10365_c0_g1_i2.p1	K14652	ribBA; 3,4-dihydroxy 2-butanone 4-phosphate synthase / GTP cyclohydrolase II [EC:4.1.99.12 3.5.4.25]	K09100 Metabolism	K09108 Metabolism of cofactors and vitamins	K00740 Riboflavin metabolism [PATH:ko00740]			DHBP_synthase	59595000	41135000	0.690242
B1.1_TRINITY_DN1037_c0_g2_i6.p1								CotH	9908800	327200	0.0330212
B1.1_TRINITY_DN1037_c1_g1_i2.p1	K12603	CNOT6, CCR4; CCR4-NOT transcription complex subunit 6 [EC:3.1.13.4]	K09120 Genetic Information Processing	K09123 Folding, sorting and degradation	K03018 RNA degradation [PATH:ko03018]				3517800	0	0
B1.1_TRINITY_DN1038_c0_g1_i7.p1	K22503	DARS1; aspartyl-tRNA synthetase [EC:6.1.1.12]	K09120 Genetic Information Processing	K09122 Translation	K00970 Aminoacyl-tRNA biosynthesis [PATH:ko00970]			PLN02850	774370000	43759000	0.0565092
B1.1_TRINITY_DN10381_c0_g1_i1.p1								DadA	7886700	5056200	0.641105
B1.1_TRINITY_DN10386_c0_g1_i4.p1	K04739	PRKAR; cAMP-dependent protein kinase regulator	K09150 Organismal Systems	K09152 Endocrine system				CAP_ED	297940000	15664200	0.052575
B1.1_TRINITY_DN1040_c0_g1_i1.p1	K00656	E2.3.1.54, pflD; formate C-acetyltransferase [EC:2.3.1.54]	K09100 Metabolism	K09101 Carbohydrate metabolism	K00620 Pyruvate metabolism [PATH:ko00620]			PFL1	898960000	160239000	0.178249
B1.1_TRINITY_DN1040_c2_g1_i1.p1	K00656	E2.3.1.54, pflD; formate C-acetyltransferase [EC:2.3.1.54]	K09100 Metabolism	K09101 Carbohydrate metabolism	K00620 Pyruvate metabolism [PATH:ko00620]			PFL1	0	1898900
B1.1_TRINITY_DN10404_c0_g1_i3.p1									6594300	0	0
B1.1_TRINITY_DN10409_c2_g1_i1.p1									2946600	36164000	12.2731
B1.1_TRINITY_DN10411_c0_g1_i3.p1	K01883	CARS, cysS; cysteinyl-tRNA synthetase [EC:6.1.1.16]	K09120 Genetic Information Processing	K09122 Translation	K00970 Aminoacyl-tRNA biosynthesis [PATH:ko00970]			PTZ00399	33505000	0	0
B1.1_TRINITY_DN10415_c2_g1_i1.p1									20206200	0	0
B1.1_TRINITY_DN10423_c0_g1_i1.p1								ARS2	28890000	0	0
B1.1_TRINITY_DN1043_c0_g2_i2.p1	K00945	cmk; CMP/dCMP kinase [EC:2.7.4.25]	K09100 Metabolism	K09104 Nucleotide metabolism	K00240 Pyrimidine metabolism [PATH:ko00240]			Cmk	333130000	17167700	0.0515345
B1.1_TRINITY_DN10432_c0_g1_i4.p1								Actin	14378900	0	0
B1.1_TRINITY_DN10435_c0_g1_i1.p1							CBM35	CBM35_mannanase-like	160729000	51516000	0.320515
B1.1_TRINITY_DN10437_c2_g1_i1.p1	K00697	otsA; trehalose 6-phosphate synthase [EC:2.4.1.15 2.4.1.347]	K09100 Metabolism	K09101 Carbohydrate metabolism	K00500 Starch and sucrose metabolism [PATH:ko00500]			GT20_TPS	2016800	0	0
B1.1_TRINITY_DN1046_c2_g1_i2.p1	K12869	CRN, CRNKL1, CLF1, SYF3; crooked neck	K09120 Genetic Information Processing	K09121 Transcription	K03040 Spliceosome [PATH:ko03040]				4013200	0	0
B1.1_TRINITY_DN1046_c2_g2_i3.p1								CotH	6295800	3879100	0.616141
B1.1_TRINITY_DN10474_c0_g4_i2.p1	K12393	AP1M; AP-1 complex subunit mu	K09140 Cellular Processes	K09141 Transport and catabolism	K04142 Lysosome [PATH:ko04142]			AP-1_Mu1_Cterm	41601000	0	0
B1.1_TRINITY_DN10478_c2_g2_i2.p1									0	35316000
B1.1_TRINITY_DN10480_c0_g1_i1.p1									0	23546000
B1.1_TRINITY_DN10485_c0_g1_i1.p1	K13984	TXNDC5, ERP46; thioredoxin domain-containing protein 5	K09120 Genetic Information Processing	K09123 Folding, sorting and degradation	K04141 Protein processing in endoplasmic reticulum [PATH:ko04141]			PDI_a_family	57193000	0	0
B1.1_TRINITY_DN10485_c1_g1_i1.p1	K01091	gph; phosphoglycolate phosphatase [EC:3.1.3.18]	K09100 Metabolism	K09101 Carbohydrate metabolism	K00630 Glyoxylate and dicarboxylate metabolism [PATH:ko00630]			Gph	15094300	16423000	1.08803
B1.1_TRINITY_DN10499_c0_g1_i3.p1	K12828	SF3B1, SAP155; splicing factor 3B subunit 1	K09120 Genetic Information Processing	K09121 Transcription	K03040 Spliceosome [PATH:ko03040]			HSH155	3560800	0	0
B1.1_TRINITY_DN10499_c0_g1_i3.p2	K12828	SF3B1, SAP155; splicing factor 3B subunit 1	K09120 Genetic Information Processing	K09121 Transcription	K03040 Spliceosome [PATH:ko03040]			HSH155	17808700	0	0
B1.1_TRINITY_DN105_c0_g1_i2.p1	K02927	RP-L40e, RPL40, UBA52; ubiquitin-large subunit ribosomal protein L40e	K09120 Genetic Information Processing	K09122 Translation	K03010 Ribosome [PATH:ko03010]			Ubl_ubiquitin	0	31612500
B1.1_TRINITY_DN105_c0_g1_i8.p1	K08770	UBC; ubiquitin C	K09120 Genetic Information Processing	K09123 Folding, sorting and degradation	K04120 Ubiquitin mediated proteolysis [PATH:ko04120]			Ubl_ubiquitin	340210000	1613340000	4.74219
B1.1_TRINITY_DN105_c1_g1_i10.p1	K18598	EML6; echinoderm microtubule-associated protein-like 6	K09180 Brite Hierarchies	K09193 Unclassified: signaling and cellular processes	K99993 Cell motility			WD40	90990000	64758100	0.711706
B1.1_TRINITY_DN1050_c1_g1_i1.p1								CotH	22485000	74487000	3.31274
B1.1_TRINITY_DN10524_c4_g1_i1.p1	K10268	FBXL2_20; F-box and leucine-rich repeat protein 2/20	K09180 Brite Hierarchies	K09182 Protein families: genetic information processing	K04121 Ubiquitin system [BR:ko04121]			AMN1	6155900	0	0
B1.1_TRINITY_DN10528_c0_g1_i2.p1								Dabb	118255000	447835000	3.78703
B1.1_TRINITY_DN1053_c1_g1_i3.p1	K14773	UTP23; U3 small nucleolar RNA-associated protein 23	K09180 Brite Hierarchies	K09182 Protein families: genetic information processing	K03009 Ribosome biogenesis [BR:ko03009]			PIN_Fcf1-like	9548200	0	0
B1.1_TRINITY_DN10535_c1_g1_i2.p1	K02218	CSNK1, CKI; casein kinase 1 [EC:2.7.11.1]	K09130 Environmental Information Processing	K09132 Signal transduction	K04011 MAPK signaling pathway - yeast [PATH:ko04011]			STKc_CK1_fungal	8964100	0	0
B1.1_TRINITY_DN10536_c0_g2_i8.p1	K14015	NPLOC4, NPL4; nuclear protein localization protein 4	K09120 Genetic Information Processing	K09123 Folding, sorting and degradation	K04141 Protein processing in endoplasmic reticulum [PATH:ko04141]			zf-NPL4	12430000	1765900	0.142068
B1.1_TRINITY_DN10589_c0_g2_i2.p1									5638800	0	0
B1.1_TRINITY_DN10609_c0_g1_i3.p1								ParA	205428000	85373700	0.415589
B1.1_TRINITY_DN1061_c0_g2_i3.p1	K15730	PTGES3; cytosolic prostaglandin-E synthase [EC:5.3.99.3]	K09100 Metabolism	K09103 Lipid metabolism	K00590 Arachidonic acid metabolism [PATH:ko00590]			p23_hB-ind1_like	501940000	154993000	0.308788
B1.1_TRINITY_DN1062_c0_g1_i1.p1	K15451	PPM2, LCMT2, TYW4; tRNA wybutosine-synthesizing protein 4 [EC:2.1.1.290 2.3.1.231]	K09180 Brite Hierarchies	K09182 Protein families: genetic information processing	K03016 Transfer RNA biogenesis [BR:ko03016]				23635000	3553100	0.150332
B1.1_TRINITY_DN10621_c0_g1_i1.p1								COG5036	2393900	0	0
B1.1_TRINITY_DN1065_c2_g1_i1.p1								DnaJ	420580	0	0
B1.1_TRINITY_DN10663_c0_g1_i2.p1	K03094	SKP1, CBF3D; S-phase kinase-associated protein 1	K09120 Genetic Information Processing	K09123 Folding, sorting and degradation	K04141 Protein processing in endoplasmic reticulum [PATH:ko04141]			SKP1	218854000	151055000	0.690209
B1.1_TRINITY_DN10672_c0_g1_i3.p1	K12860	CDC5L, CDC5, CEF1; pre-mRNA-splicing factor CDC5/CEF1	K09120 Genetic Information Processing	K09121 Transcription	K03040 Spliceosome [PATH:ko03040]			Myb_Cef	15071500	0	0
B1.1_TRINITY_DN107_c2_g2_i2.p1	K01897	ACSL, fadD; long-chain acyl-CoA synthetase [EC:6.2.1.3]	K09100 Metabolism	K09103 Lipid metabolism	K00061 Fatty acid biosynthesis [PATH:ko00061]			LC-FACS_euk	155464000	296570	0.00190764
B1.1_TRINITY_DN10701_c0_g1_i1.p1									0	31526000
B1.1_TRINITY_DN10703_c4_g1_i1.p1	K14573	NOP4, RBM28; nucleolar protein 4	K09120 Genetic Information Processing	K09122 Translation	K03008 Ribosome biogenesis in eukaryotes [PATH:ko03008]			RRM1_RBM28_like	12541900	0	0
B1.1_TRINITY_DN10704_c0_g1_i2.p1	K14859	SSF1_2; ribosome biogenesis protein SSF1/2	K09180 Brite Hierarchies	K09182 Protein families: genetic information processing	K03009 Ribosome biogenesis [BR:ko03009]			Brix	1612190	0	0
B1.1_TRINITY_DN1072_c0_g1_i5.p1								Rap_GAP	10804200	0	0
B1.1_TRINITY_DN10727_c0_g1_i3.p1								RRM1_MRN1	114764000	7055100	0.0614749
B1.1_TRINITY_DN10727_c2_g1_i1.p1									7870500	0	0
B1.1_TRINITY_DN10728_c0_g1_i1.p1									9266000	0	0
B1.1_TRINITY_DN10738_c0_g4_i1.p1	K12171	SH3RF, POSH; E3 ubiquitin-protein ligase SH3RF [EC:2.3.2.27]	K09180 Brite Hierarchies	K09181 Protein families: metabolism	K01009 Protein phosphatases and associated proteins [BR:ko01009]				10302900	0	0
B1.1_TRINITY_DN10738_c1_g1_i1.p1									4822600	0	0
B1.1_TRINITY_DN1074_c4_g1_i1.p2								START_STARD2-like	1997900	0	0
B1.1_TRINITY_DN10745_c0_g2_i1.p1	K16833	PPP1R2, IPP2; protein phosphatase inhibitor 2	K09180 Brite Hierarchies	K09181 Protein families: metabolism	K01009 Protein phosphatases and associated proteins [BR:ko01009]				20827000	0	0
B1.1_TRINITY_DN10759_c0_g1_i3.p1	K08517	SEC22; vesicle transport protein SEC22	K09120 Genetic Information Processing	K09123 Folding, sorting and degradation	K04130 SNARE interactions in vesicular transport [PATH:ko04130]			Longin	17240900	0	0
B1.1_TRINITY_DN10763_c0_g1_i2.p1	K01681	ACO, acnA; aconitate hydratase [EC:4.2.1.3]	K09100 Metabolism	K09101 Carbohydrate metabolism	K00020 Citrate cycle (TCA cycle) [PATH:ko00020]			AcnA_Mitochondrial	184823000	88128000	0.476824
B1.1_TRINITY_DN10763_c0_g2_i2.p1	K01681	ACO, acnA; aconitate hydratase [EC:4.2.1.3]	K09100 Metabolism	K09101 Carbohydrate metabolism	K00020 Citrate cycle (TCA cycle) [PATH:ko00020]			aconitase_mito	809690000	308698000	0.381255
B1.1_TRINITY_DN10778_c2_g1_i1.p1	K18757	LARP1; la-related protein 1	K09180 Brite Hierarchies	K09182 Protein families: genetic information processing	K03019 Messenger RNA biogenesis [BR:ko03019]			DM15	93106000	0	0
B1.1_TRINITY_DN10780_c3_g1_i1.p1									2502200	0	0
B1.1_TRINITY_DN10784_c1_g1_i1.p1								C2B_Copine	13301500	6347000	0.477164
B1.1_TRINITY_DN1079_c0_g1_i5.p1	K10752	RBBP4, HAT2, CAF1, MIS16; histone-binding protein RBBP4	K09140 Cellular Processes	K09143 Cell growth and death	K04218 Cellular senescence [PATH:ko04218]			WD40	18438900	0	0
B1.1_TRINITY_DN10790_c0_g2_i1.p1	K05658	ABCB1, CD243; ATP-binding cassette, subfamily B (MDR/TAP), member 1 [EC:7.6.2.2]	K09130 Environmental Information Processing	K09131 Membrane transport	K02010 ABC transporters [PATH:ko02010]			MdlB	5107150	0	0
B1.1_TRINITY_DN10790_c0_g3_i1.p1	K05658	ABCB1, CD243; ATP-binding cassette, subfamily B (MDR/TAP), member 1 [EC:7.6.2.2]	K09130 Environmental Information Processing	K09131 Membrane transport	K02010 ABC transporters [PATH:ko02010]			ABC_MTABC3_MDL1_MDL2	33722000	4345300	0.128857
B1.1_TRINITY_DN10792_c0_g1_i1.p1	K00601	E2.1.2.2; phosphoribosylglycinamide formyltransferase [EC:2.1.2.2]	K09100 Metabolism	K09104 Nucleotide metabolism	K00230 Purine metabolism [PATH:ko00230]			FMT_core_GART	530960000	94881000	0.178697
B1.1_TRINITY_DN10796_c0_g1_i1.p1									2291000	7507100	3.27678
B1.1_TRINITY_DN10797_c0_g1_i5.p1	K17267	COPG; coatomer subunit gamma	K09180 Brite Hierarchies	K09182 Protein families: genetic information processing	K04131 Membrane trafficking [BR:ko04131]			SEC21	156026000	0	0
B1.1_TRINITY_DN10797_c0_g1_i6.p1	K17267	COPG; coatomer subunit gamma	K09180 Brite Hierarchies	K09182 Protein families: genetic information processing	K04131 Membrane trafficking [BR:ko04131]			SEC21	72146000	0	0
B1.1_TRINITY_DN108_c0_g1_i5.p1								PLN00113	5.6115e+09	350469000	0.0624555
B1.1_TRINITY_DN108_c0_g1_i9.p1									427580	60680000	141.915
B1.1_TRINITY_DN108_c0_g2_i7.p1								PLN00113	1.55293e+10	4798320000	0.308985
B1.1_TRINITY_DN1080_c0_g1_i1.p1									104960000	2240000	0.0213415
B1.1_TRINITY_DN10809_c0_g1_i3.p1	K01392	THOP1; thimet oligopeptidase [EC:3.4.24.15]	K09150 Organismal Systems	K09152 Endocrine system				M3A_TOP	5489000	1766630	0.321849
B1.1_TRINITY_DN10809_c6_g1_i1.p1									0	8305500
B1.1_TRINITY_DN10816_c0_g2_i5.p1	K24728	CFAP52, WDR16; cilia- and flagella-associated protein 52	K09180 Brite Hierarchies	K09183 Protein families: signaling and cellular processes	K04990 Domain-containing proteins not elsewhere classified [BR:ko04990]			WD40	8052800	5603200	0.695808
B1.1_TRINITY_DN10821_c0_g1_i1.p1									30069600	22984000	0.76436
B1.1_TRINITY_DN10829_c1_g1_i1.p1	K21618	DLD3; (R)-2-hydroxyglutarate---pyruvate transhydrogenase [EC:1.1.99.40]	K09100 Metabolism	K09101 Carbohydrate metabolism	K00620 Pyruvate metabolism [PATH:ko00620]			GlcD	371630000	26545490	0.0714299
B1.1_TRINITY_DN10832_c1_g1_i13.p1	K13985	NAPEPLD; N-acyl-phosphatidylethanolamine-hydrolysing phospholipase D [EC:3.1.4.54]	K09150 Organismal Systems	K09156 Nervous system				RomA-like_MBL-fold	11209000	0	0
B1.1_TRINITY_DN10841_c0_g1_i8.p1	K00671	NMT; glycylpeptide N-tetradecanoyltransferase [EC:2.3.1.97]	K09180 Brite Hierarchies	K09191 Unclassified: metabolism	K99980 Enzymes with EC numbers			NMT1	33605000	4698100	0.139804
B1.1_TRINITY_DN10843_c0_g1_i7.p1								CSP_CDS	481170000	261198000	0.542839
B1.1_TRINITY_DN1086_c0_g1_i2.p1	K14394	ACP1; low molecular weight phosphotyrosine protein phosphatase [EC:3.1.3.2 3.1.3.48]	K09100 Metabolism	K09108 Metabolism of cofactors and vitamins	K00730 Thiamine metabolism [PATH:ko00730]			LMWPTP	39805000	38047000	0.955835
B1.1_TRINITY_DN1086_c0_g2_i1.p1	K17279	REEP5_6; receptor expression-enhancing protein 5/6	K09180 Brite Hierarchies	K09183 Protein families: signaling and cellular processes	K04147 Exosome [BR:ko04147]				48222000	0	0
B1.1_TRINITY_DN1086_c3_g1_i1.p1	K20040	HIP1R, SLA2; huntingtin-interacting protein 1-related protein	K09180 Brite Hierarchies	K09182 Protein families: genetic information processing	K04131 Membrane trafficking [BR:ko04131]			ILWEQ	94864000	3011900	0.0317497
B1.1_TRINITY_DN10863_c0_g2_i1.p1									3839500	0	0
B1.1_TRINITY_DN1088_c0_g1_i9.p1	K01870	IARS, ileS; isoleucyl-tRNA synthetase [EC:6.1.1.5]	K09120 Genetic Information Processing	K09122 Translation	K00970 Aminoacyl-tRNA biosynthesis [PATH:ko00970]			PLN02882	1414530000	174856000	0.123614
B1.1_TRINITY_DN1088_c0_g2_i1.p1	K02183	CALM; calmodulin	K09130 Environmental Information Processing	K09132 Signal transduction	K04016 MAPK signaling pathway - plant [PATH:ko04016]			PTZ00184	1163740000	4.0771e+09	3.50345
B1.1_TRINITY_DN109_c0_g2_i1.p1	K00656	E2.3.1.54, pflD; formate C-acetyltransferase [EC:2.3.1.54]	K09100 Metabolism	K09101 Carbohydrate metabolism	K00620 Pyruvate metabolism [PATH:ko00620]			PFL1	2.5315e+09	359181000	0.141885
B1.1_TRINITY_DN109_c0_g2_i3.p1	K00656	E2.3.1.54, pflD; formate C-acetyltransferase [EC:2.3.1.54]	K09100 Metabolism	K09101 Carbohydrate metabolism	K00620 Pyruvate metabolism [PATH:ko00620]			PFL1	191951000	0	0
B1.1_TRINITY_DN10901_c0_g2_i2.p1	K05824	LYS12; homoisocitrate dehydrogenase [EC:1.1.1.87]	K09100 Metabolism	K09105 Amino acid metabolism	K00300 Lysine biosynthesis [PATH:ko00300]			LeuB	4402600000	1482730000	0.336785
B1.1_TRINITY_DN10902_c0_g1_i1.p1									1389900	0	0
B1.1_TRINITY_DN1093_c0_g1_i1.p1	K08793	STK32, YANK; serine/threonine kinase 32 [EC:2.7.11.1]	K09180 Brite Hierarchies	K09181 Protein families: metabolism	K01001 Protein kinases [BR:ko01001]			STKc_Yank1	26984000	13537200	0.501675
B1.1_TRINITY_DN10935_c0_g3_i2.p1	K06698	PSME3; proteasome activator subunit 3 (PA28 gamma)	K09120 Genetic Information Processing	K09123 Folding, sorting and degradation	K03050 Proteasome [PATH:ko03050]			PA28_beta	4633600	1159500	0.250237
B1.1_TRINITY_DN10945_c0_g3_i1.p1									5112800	0	0
B1.1_TRINITY_DN10948_c1_g1_i1.p1									29290000	0	0
B1.1_TRINITY_DN10959_c1_g1_i1.p1	K08776	NPEPPS; puromycin-sensitive aminopeptidase [EC:3.4.11.14]	K09180 Brite Hierarchies	K09181 Protein families: metabolism	K01002 Peptidases and inhibitors [BR:ko01002]			M1_APN-Q_like	14560500	10492700	0.720628
B1.1_TRINITY_DN10967_c0_g1_i1.p1	K05863	SLC25A4S, ANT; solute carrier family 25 (mitochondrial adenine nucleotide translocator), member 4/5/6/31	K09130 Environmental Information Processing	K09132 Signal transduction	K04020 Calcium signaling pathway [PATH:ko04020]			PTZ00169	24696000000	431183000	0.0174596
B1.1_TRINITY_DN10968_c1_g1_i1.p1	K24814	HEATR5, LAA1; HEAT repeat-containing protein 5	K09180 Brite Hierarchies	K09182 Protein families: genetic information processing	K04131 Membrane trafficking [BR:ko04131]				611550	0	0
B1.1_TRINITY_DN10991_c2_g1_i1.p1	K00560	thyA, TYMS; thymidylate synthase [EC:2.1.1.45]	K09100 Metabolism	K09104 Nucleotide metabolism	K00240 Pyrimidine metabolism [PATH:ko00240]			PTZ00164	16639800	22721100	1.36547
B1.1_TRINITY_DN10993_c1_g1_i2.p1									95804000	0	0
B1.1_TRINITY_DN110_c3_g1_i1.p1								ABC_6TM_YOR1_D1_like	3507300	0	0
B1.1_TRINITY_DN11000_c0_g1_i2.p1	K24172	CAND2, TIP120B; cullin-associated NEDD8-dissociated protein 2	K09180 Brite Hierarchies	K09182 Protein families: genetic information processing	K04121 Ubiquitin system [BR:ko04121]				42991000	0	0
B1.1_TRINITY_DN11007_c0_g1_i2.p1									2239900	0	0
B1.1_TRINITY_DN11013_c0_g2_i1.p1								GT8_Glycogenin	0	1427300
B1.1_TRINITY_DN1102_c0_g1_i1.p1	K00856	ADK, adoK; adenosine kinase [EC:2.7.1.20]	K09100 Metabolism	K09104 Nucleotide metabolism	K00230 Purine metabolism [PATH:ko00230]			PLN02548	399440000	282384000	0.70695
B1.1_TRINITY_DN1102_c2_g2_i1.p1	K09506	DNAJA5; DnaJ homolog subfamily A member 5	K09180 Brite Hierarchies	K09182 Protein families: genetic information processing	K03009 Ribosome biogenesis [BR:ko03009]			PRK10767	839050	0	0
B1.1_TRINITY_DN1104_c0_g1_i1.p1	K13348	MPV17; protein Mpv17	K09140 Cellular Processes	K09141 Transport and catabolism	K04146 Peroxisome [PATH:ko04146]			Mpv17_PMP22	12701400	0	0
B1.1_TRINITY_DN11040_c0_g1_i2.p1	K04567	KARS, lysS; lysyl-tRNA synthetase, class II [EC:6.1.1.6]	K09120 Genetic Information Processing	K09122 Translation	K00970 Aminoacyl-tRNA biosynthesis [PATH:ko00970]			PLN02502	2.4137e+09	53315500	0.0220887
B1.1_TRINITY_DN11043_c0_g1_i2.p1									472340000	155991000	0.330252
B1.1_TRINITY_DN11044_c0_g1_i2.p1	K11092	SNRPA1; U2 small nuclear ribonucleoprotein A'	K09120 Genetic Information Processing	K09121 Transcription	K03040 Spliceosome [PATH:ko03040]			LRR_9	39754000	2480100	0.0623862
B1.1_TRINITY_DN11046_c3_g2_i1.p1								TMR_SDR_a	919290000	0	0
B1.1_TRINITY_DN11057_c0_g1_i3.p1									1880100	0	0
B1.1_TRINITY_DN11062_c0_g2_i2.p1	K03106	SRP54, ffh; signal recognition particle subunit SRP54 [EC:3.6.5.4]	K09120 Genetic Information Processing	K09123 Folding, sorting and degradation	K03060 Protein export [PATH:ko03060]			SRP54_euk	81816000	0	0
B1.1_TRINITY_DN11072_c0_g2_i7.p1	K07955	ARL8; ADP-ribosylation factor-like protein 8	K09160 Human Diseases	K09171 Infectious disease: bacterial	K05132 Salmonella infection [PATH:ko05132]			Arl10_like	13084200	0	0
B1.1_TRINITY_DN11072_c1_g1_i1.p1	K01952	PFAS, purL; phosphoribosylformylglycinamidine synthase [EC:6.3.5.3]	K09100 Metabolism	K09104 Nucleotide metabolism	K00230 Purine metabolism [PATH:ko00230]			PRK05297	739290000	37799000	0.0511288
B1.1_TRINITY_DN11074_c0_g1_i4.p1	K12391	AP1G1; AP-1 complex subunit gamma-1	K09140 Cellular Processes	K09141 Transport and catabolism	K04142 Lysosome [PATH:ko04142]			Adaptin_N	15427300	0	0
B1.1_TRINITY_DN11074_c0_g2_i2.p1	K12391	AP1G1; AP-1 complex subunit gamma-1	K09140 Cellular Processes	K09141 Transport and catabolism	K04142 Lysosome [PATH:ko04142]				13329900	0	0
B1.1_TRINITY_DN11079_c0_g1_i4.p1	K01415	ECE; endothelin-converting enzyme [EC:3.4.24.71]	K09180 Brite Hierarchies	K09181 Protein families: metabolism	K01002 Peptidases and inhibitors [BR:ko01002]			M13	123967000	42386300	0.341916
B1.1_TRINITY_DN11089_c1_g2_i6.p1	K08794	CAMK1; calcium/calmodulin-dependent protein kinase I [EC:2.7.11.17]	K09130 Environmental Information Processing	K09132 Signal transduction	K04020 Calcium signaling pathway [PATH:ko04020]			STKc_CAMK	4996700	0	0
B1.1_TRINITY_DN1109_c2_g1_i2.p1	K13126	PABPC; polyadenylate-binding protein	K09120 Genetic Information Processing	K09122 Translation	K03015 mRNA surveillance pathway [PATH:ko03015]			PABP-1234	472000000	76923000	0.162972
B1.1_TRINITY_DN1109_c3_g1_i2.p1									36897000	0	0
B1.1_TRINITY_DN111_c0_g1_i4.p1	K05349	bglX; beta-glucosidase [EC:3.2.1.21]	K09100 Metabolism	K09101 Carbohydrate metabolism	K00500 Starch and sucrose metabolism [PATH:ko00500]		GH3	PRK15098	143991000	153099000	1.06325
B1.1_TRINITY_DN111_c0_g2_i1.p1	K05349	bglX; beta-glucosidase [EC:3.2.1.21]	K09100 Metabolism	K09101 Carbohydrate metabolism	K00500 Starch and sucrose metabolism [PATH:ko00500]	CBM_10		PRK15098	0	825210000
B1.1_TRINITY_DN111_c0_g3_i1.p1	K05349	bglX; beta-glucosidase [EC:3.2.1.21]	K09100 Metabolism	K09101 Carbohydrate metabolism	K00500 Starch and sucrose metabolism [PATH:ko00500]		GH3	BglX	0	22091000
B1.1_TRINITY_DN1110_c0_g1_i15.p1	K02144	ATPeV1H; V-type H+-transporting ATPase subunit H	K09100 Metabolism	K09102 Energy metabolism	K00190 Oxidative phosphorylation [PATH:ko00190]			VATPase_H	1176320000	199355000	0.169473
B1.1_TRINITY_DN1110_c0_g1_i4.p2	K02144	ATPeV1H; V-type H+-transporting ATPase subunit H	K09100 Metabolism	K09102 Energy metabolism	K00190 Oxidative phosphorylation [PATH:ko00190]			VATPase_H	809910	0	0
B1.1_TRINITY_DN11101_c0_g1_i1.p1								Cof	72423000	0	0
B1.1_TRINITY_DN11106_c0_g2_i1.p1	K05609	UCHL3, YUH1; ubiquitin carboxyl-terminal hydrolase L3 [EC:3.4.19.12]	K09180 Brite Hierarchies	K09181 Protein families: metabolism	K01002 Peptidases and inhibitors [BR:ko01002]			Peptidase_C12_UCH_L1_L3	13486000	29790000	2.20896
B1.1_TRINITY_DN11154_c0_g1_i2.p1	K07827	KRAS, KRAS2; GTPase KRas	K09130 Environmental Information Processing	K09132 Signal transduction	K04010 MAPK signaling pathway [PATH:ko04010]			RAS	8517000	2905500	0.341141
B1.1_TRINITY_DN1117_c0_g1_i3.p1	K08288	PRKCSH; protein kinase C substrate 80K-H	K09120 Genetic Information Processing	K09123 Folding, sorting and degradation	K04141 Protein processing in endoplasmic reticulum [PATH:ko04141]			PRKCSH_1	23599400	0	0
B1.1_TRINITY_DN11219_c0_g1_i5.p1								TMEM18	29943000	0	0
B1.1_TRINITY_DN1123_c1_g1_i2.p1									0	2149900
B1.1_TRINITY_DN1123_c1_g2_i1.p1									4597600	6219900	1.35286
B1.1_TRINITY_DN1124_c1_g1_i1.p1	K13171	SRRM1, SRM160; serine/arginine repetitive matrix protein 1	K09120 Genetic Information Processing	K09122 Translation	K03013 Nucleocytoplasmic transport [PATH:ko03013]			PWI	4022300	0	0
B1.1_TRINITY_DN11252_c0_g2_i5.p1	K04354	PPP2R2; serine/threonine-protein phosphatase 2A regulatory subunit B	K09120 Genetic Information Processing	K09122 Translation	K03015 mRNA surveillance pathway [PATH:ko03015]			CDC55	120342000	29983400	0.249152
B1.1_TRINITY_DN11253_c0_g1_i2.p1									1230800	0	0
B1.1_TRINITY_DN11264_c0_g2_i3.p1	K06997	yggS, PROSC; PLP dependent protein	K09180 Brite Hierarchies	K09191 Unclassified: metabolism	K99985 Amino acid metabolism			PLPDE_III_YBL036c_euk	103765000	231089000	2.22704
B1.1_TRINITY_DN11268_c0_g1_i2.p1							CE4	CE4_ClCDA_like	928270	96181000	103.613
B1.1_TRINITY_DN11287_c0_g1_i1.p1								Chitin_bind_1	20482500	0	0
B1.1_TRINITY_DN11295_c0_g1_i2.p1	K05759	PFN; profilin	K09130 Environmental Information Processing	K09132 Signal transduction	K04013 MAPK signaling pathway - fly [PATH:ko04013]			Profilin	369000000	1794260000	4.86249
B1.1_TRINITY_DN113_c0_g1_i10.p1								ER_PDI_fam	127526000	0	0
B1.1_TRINITY_DN1130_c1_g1_i1.p1								RasGAP_IQGAP_like	12349600	0	0
B1.1_TRINITY_DN11305_c0_g1_i3.p1	K15921	xynD; arabinoxylan arabinofuranohydrolase [EC:3.2.1.55]	K09100 Metabolism	K09101 Carbohydrate metabolism	K00520 Amino sugar and nucleotide sugar metabolism [PATH:ko00520]	CBM_10	GH43_16+CBM6	GH43_XynD-like	21158940	1090306000	51.5293
B1.1_TRINITY_DN11305_c0_g2_i1.p1	K01181	E3.2.1.8, xynA; endo-1,4-beta-xylanase [EC:3.2.1.8]	K09180 Brite Hierarchies	K09191 Unclassified: metabolism	K99980 Enzymes with EC numbers	CBM_10	CBM13	Glyco_10	0	326577000
B1.1_TRINITY_DN1131_c1_g1_i2.p1									5377100	0	0
B1.1_TRINITY_DN11310_c1_g2_i1.p1									3455100	0	0
B1.1_TRINITY_DN1133_c0_g2_i2.p1	K09660	MPDU1; mannose-P-dolichol utilization defect 1	K09180 Brite Hierarchies	K09181 Protein families: metabolism	K01003 Glycosyltransferases [BR:ko01003]			2A43	22070900	0	0
B1.1_TRINITY_DN11331_c0_g1_i1.p1	K11836	USP5_13, UBP14; ubiquitin carboxyl-terminal hydrolase 5/13 [EC:3.4.19.12]	K09180 Brite Hierarchies	K09181 Protein families: metabolism	K01002 Peptidases and inhibitors [BR:ko01002]			UBP14	10577600	1851400	0.17503
B1.1_TRINITY_DN1134_c0_g1_i2.p1								PolyPPase_VTC4_like	145410000	0	0
B1.1_TRINITY_DN11340_c0_g3_i8.p1	K01551	arsA, ASNA1, GET3; arsenite/tail-anchored protein-transporting ATPase [EC:7.3.2.7 7.3.-.-]	K09180 Brite Hierarchies	K09182 Protein families: genetic information processing	K04131 Membrane trafficking [BR:ko04131]			ArsA_ATPase	45589000	0	0
B1.1_TRINITY_DN11341_c2_g1_i1.p1	K02898	RP-L26e, RPL26; large subunit ribosomal protein L26e	K09120 Genetic Information Processing	K09122 Translation	K03010 Ribosome [PATH:ko03010]			Ribosomal_L26	1128340000	83244000	0.0737756
B1.1_TRINITY_DN11350_c0_g1_i1.p1									2429600	0	0
B1.1_TRINITY_DN11367_c0_g1_i1.p1	K16449	RGS; regulator of G-protein signaling	K09180 Brite Hierarchies	K09193 Unclassified: signaling and cellular processes	K99995 Signaling proteins				6243500	12610100	2.01972
B1.1_TRINITY_DN1137_c0_g2_i3.p1									49589000	14186500	0.286082
B1.1_TRINITY_DN11376_c5_g1_i1.p1									76127000	2529000	0.0332208
B1.1_TRINITY_DN1138_c0_g1_i2.p1	K23643	LSM12; protein LSM12	K09150 Organismal Systems	K09159 Environmental adaptation				AD	39449000	0	0
B1.1_TRINITY_DN1139_c0_g1_i3.p1	K09487	HSP90B, TRA1; heat shock protein 90kDa beta	K09120 Genetic Information Processing	K09123 Folding, sorting and degradation	K04141 Protein processing in endoplasmic reticulum [PATH:ko04141]			PRK05218	1383710000	67721000	0.0489416
B1.1_TRINITY_DN1139_c0_g2_i1.p1									65402000	6355800	0.0971805
B1.1_TRINITY_DN1139_c1_g2_i3.p1	K02943	RP-LP2, RPLP2; large subunit ribosomal protein LP2	K09120 Genetic Information Processing	K09122 Translation	K03010 Ribosome [PATH:ko03010]			Ribosomal_P2	1051210000	47889000	0.0455561
B1.1_TRINITY_DN1140_c0_g1_i1.p1	K13338	PEX1; peroxin-1	K09140 Cellular Processes	K09141 Transport and catabolism	K04146 Peroxisome [PATH:ko04146]			RecA-like_PEX1_r2	2003700	0	0
B1.1_TRINITY_DN11405_c0_g1_i2.p1	K01624	FBA, fbaA; fructose-bisphosphate aldolase, class II [EC:4.1.2.13]	K09100 Metabolism	K09101 Carbohydrate metabolism	K00010 Glycolysis / Gluconeogenesis [PATH:ko00010]			FBP_aldolase_IIA	10775900	0	0
B1.1_TRINITY_DN11415_c0_g1_i1.p1	K03097	CSNK2A; casein kinase II subunit alpha [EC:2.7.11.1]	K09120 Genetic Information Processing	K09122 Translation	K03008 Ribosome biogenesis in eukaryotes [PATH:ko03008]			STKc_CK2_alpha	8979800	0	0
B1.1_TRINITY_DN1142_c1_g1_i4.p1	K13289	CTSA, CPY; cathepsin A (carboxypeptidase C) [EC:3.4.16.5]	K09140 Cellular Processes	K09141 Transport and catabolism	K04142 Lysosome [PATH:ko04142]			PTZ00472	8818700	10850300	1.23037
B1.1_TRINITY_DN11431_c0_g1_i2.p1	K14573	NOP4, RBM28; nucleolar protein 4	K09120 Genetic Information Processing	K09122 Translation	K03008 Ribosome biogenesis in eukaryotes [PATH:ko03008]			RRM2_RBM28_like	13744100	0	0
B1.1_TRINITY_DN11434_c2_g1_i1.p1	K15371	GDH2; glutamate dehydrogenase [EC:1.4.1.2]	K09100 Metabolism	K09102 Energy metabolism	K00910 Nitrogen metabolism [PATH:ko00910]			PTZ00324	5895500	0	0
B1.1_TRINITY_DN11444_c0_g1_i2.p1									0	21336600
B1.1_TRINITY_DN1145_c0_g2_i1.p1									9754500	1572820000	161.24
B1.1_TRINITY_DN11470_c0_g1_i1.p1	K23787	DMA1_2; E3 ubiquitin-protein ligase DMA1/2 [EC:2.3.2.27]	K09180 Brite Hierarchies	K09182 Protein families: genetic information processing	K04121 Ubiquitin system [BR:ko04121]			FHA_DMA-like	17485800	0	0
B1.1_TRINITY_DN1148_c0_g1_i2.p1									1662700	0	0
B1.1_TRINITY_DN1149_c0_g2_i2.p1	K17508	PTC7, PPTC7; protein phosphatase PTC7 [EC:3.1.3.16]	K09180 Brite Hierarchies	K09181 Protein families: metabolism	K01009 Protein phosphatases and associated proteins [BR:ko01009]			PP2C_SIG	4972900	0	0
B1.1_TRINITY_DN1149_c1_g2_i1.p1	K01652	E2.2.1.6L, ilvB, ilvG, ilvI; acetolactate synthase I/II/III large subunit [EC:2.2.1.6]	K09100 Metabolism	K09101 Carbohydrate metabolism	K00650 Butanoate metabolism [PATH:ko00650]			acolac_lg	575860000	18371000	0.0319019
B1.1_TRINITY_DN115_c0_g1_i6.p1	K00889	PIP5K; 1-phosphatidylinositol-4-phosphate 5-kinase [EC:2.7.1.68]	K09100 Metabolism	K09101 Carbohydrate metabolism	K00562 Inositol phosphate metabolism [PATH:ko00562]			PIPKc_PIP5K_yeast_like	115756000	0	0
B1.1_TRINITY_DN1153_c0_g1_i2.p1	K06965	PELO, DOM34, pelA; protein pelota	K09120 Genetic Information Processing	K09122 Translation	K03015 mRNA surveillance pathway [PATH:ko03015]			PelA	3309800	0	0
B1.1_TRINITY_DN1154_c0_g1_i2.p1	K01835	pgm; phosphoglucomutase [EC:5.4.2.2]	K09100 Metabolism	K09101 Carbohydrate metabolism	K00010 Glycolysis / Gluconeogenesis [PATH:ko00010]			PGM1	3.8456e+09	3462800000	0.900458
B1.1_TRINITY_DN11541_c0_g5_i3.p1	K01641	HMGCS; hydroxymethylglutaryl-CoA synthase [EC:2.3.3.10]	K09100 Metabolism	K09101 Carbohydrate metabolism	K00650 Butanoate metabolism [PATH:ko00650]			HMG-CoA-S_euk	92271000	447570	0.0048506
B1.1_TRINITY_DN1155_c0_g4_i1.p1	K01519	ITPA; inosine triphosphate pyrophosphatase [EC:3.6.1.-]	K09100 Metabolism	K09104 Nucleotide metabolism	K00230 Purine metabolism [PATH:ko00230]			HAM1	14385400	26703100	1.85626
B1.1_TRINITY_DN11550_c0_g1_i1.p1	K11426	SMYD; [histone H3]-lysine4/36 N-trimethyltransferase SMYD [EC:2.1.1.354 2.1.1.357]	K09100 Metabolism	K09105 Amino acid metabolism	K00310 Lysine degradation [PATH:ko00310]			SET_SMYD	306610000	146163000	0.476707
B1.1_TRINITY_DN11557_c0_g2_i2.p1	K06685	MOB1, Mats; MOB kinase activator 1	K09130 Environmental Information Processing	K09132 Signal transduction	K04390 Hippo signaling pathway [PATH:ko04390]			Mob1_phocein	29867000	3056600	0.10234
B1.1_TRINITY_DN11561_c3_g1_i1.p1								SH3_Fus1p	10662600	1175700	0.110264
B1.1_TRINITY_DN11578_c0_g2_i1.p1	K05658	ABCB1, CD243; ATP-binding cassette, subfamily B (MDR/TAP), member 1 [EC:7.6.2.2]	K09130 Environmental Information Processing	K09131 Membrane transport	K02010 ABC transporters [PATH:ko02010]			PTZ00265	505480000	11764000	0.0232729
B1.1_TRINITY_DN11595_c0_g1_i1.p1								RPA3	13331100	3765300	0.282445
B1.1_TRINITY_DN116_c0_g1_i1.p1	K00698	CHS1; chitin synthase [EC:2.4.1.16]	K09100 Metabolism	K09101 Carbohydrate metabolism	K00520 Amino sugar and nucleotide sugar metabolism [PATH:ko00520]			Chitin_synth_2	10114500	0	0
B1.1_TRINITY_DN116_c1_g1_i3.p1	K00698	CHS1; chitin synthase [EC:2.4.1.16]	K09100 Metabolism	K09101 Carbohydrate metabolism	K00520 Amino sugar and nucleotide sugar metabolism [PATH:ko00520]			Chitin_synth_2	13887300	0	0
B1.1_TRINITY_DN116_c1_g3_i2.p1	K00698	CHS1; chitin synthase [EC:2.4.1.16]	K09100 Metabolism	K09101 Carbohydrate metabolism	K00520 Amino sugar and nucleotide sugar metabolism [PATH:ko00520]			Chitin_synth_2	107893000	0	0
B1.1_TRINITY_DN11611_c2_g1_i1.p1									1696100	0	0
B1.1_TRINITY_DN11619_c0_g1_i2.p1								SpoVK	69031000	0	0
B1.1_TRINITY_DN11624_c2_g1_i1.p1	K11841	USP10, UBP3; ubiquitin carboxyl-terminal hydrolase 10 [EC:3.4.19.12]	K09140 Cellular Processes	K09141 Transport and catabolism	K04139 Mitophagy - yeast [PATH:ko04139]			Peptidase_C19	3516700	0	0
B1.1_TRINITY_DN11631_c0_g1_i3.p1	K01101	E3.1.3.41; 4-nitrophenyl phosphatase [EC:3.1.3.41]	K09100 Metabolism	K09111 Xenobiotics biodegradation and metabolism	K00627 Aminobenzoate degradation [PATH:ko00627]			HAD_Pase_UmpH-like	146970000	97723000	0.664918
B1.1_TRINITY_DN1164_c0_g3_i2.p1	K03259	EIF4E; translation initiation factor 4E	K09130 Environmental Information Processing	K09132 Signal transduction	K04066 HIF-1 signaling pathway [PATH:ko04066]			IF4E	7301600	0	0
B1.1_TRINITY_DN11644_c0_g1_i1.p1									1200020	0	0
B1.1_TRINITY_DN11647_c0_g1_i1.p1									1162200	0	0
B1.1_TRINITY_DN1165_c0_g1_i19.p1	K14007	SEC24; protein transport protein SEC24	K09120 Genetic Information Processing	K09123 Folding, sorting and degradation	K04141 Protein processing in endoplasmic reticulum [PATH:ko04141]			COG5028	119086000	2854200	0.0239676
B1.1_TRINITY_DN1165_c0_g3_i3.p1	K14006	SEC23; protein transport protein SEC23	K09120 Genetic Information Processing	K09123 Folding, sorting and degradation	K04141 Protein processing in endoplasmic reticulum [PATH:ko04141]			PLN00162	8958400	0	0
B1.1_TRINITY_DN1165_c0_g4_i1.p1	K14006	SEC23; protein transport protein SEC23	K09120 Genetic Information Processing	K09123 Folding, sorting and degradation	K04141 Protein processing in endoplasmic reticulum [PATH:ko04141]			PLN00162	13264400	0	0
B1.1_TRINITY_DN1165_c0_g6_i2.p1	K14007	SEC24; protein transport protein SEC24	K09120 Genetic Information Processing	K09123 Folding, sorting and degradation	K04141 Protein processing in endoplasmic reticulum [PATH:ko04141]			COG5028	31239000	0	0
B1.1_TRINITY_DN1166_c0_g1_i3.p1	K03104	SRP14; signal recognition particle subunit SRP14	K09120 Genetic Information Processing	K09123 Folding, sorting and degradation	K03060 Protein export [PATH:ko03060]			SRP14	25446800	3623700	0.142403
B1.1_TRINITY_DN11663_c0_g1_i1.p1								Bbox1_DUF2009	13572600	0	0
B1.1_TRINITY_DN11664_c0_g1_i1.p1	K00698	CHS1; chitin synthase [EC:2.4.1.16]	K09100 Metabolism	K09101 Carbohydrate metabolism	K00520 Amino sugar and nucleotide sugar metabolism [PATH:ko00520]			Chitin_synth_2	10571200	0	0
B1.1_TRINITY_DN11664_c3_g1_i1.p1	K08286	E2.7.11.-; protein-serine/threonine kinase [EC:2.7.11.-]	K09180 Brite Hierarchies	K09191 Unclassified: metabolism	K99980 Enzymes with EC numbers			STKc_phototropin_like	2251300	0	0
B1.1_TRINITY_DN11669_c0_g1_i23.p1	K24736	WDR1, AIP1; WD repeat-containing protein 1 (actin-interacting protein 1)	K09180 Brite Hierarchies	K09183 Protein families: signaling and cellular processes	K04990 Domain-containing proteins not elsewhere classified [BR:ko04990]			WD40	361260000	1547220000	4.28284
B1.1_TRINITY_DN1167_c0_g1_i2.p1								STKc_CDK1_CdkB_like	38757000	0	0
B1.1_TRINITY_DN11678_c2_g1_i2.p1									0	5674000
B1.1_TRINITY_DN11680_c0_g1_i2.p1	K11412	SIRT2, SIR2L2; NAD+-dependent protein deacetylase sirtuin 2 [EC:2.3.1.286]	K09100 Metabolism	K09108 Metabolism of cofactors and vitamins	K00760 Nicotinate and nicotinamide metabolism [PATH:ko00760]			SIRT1	4817600	0	0
B1.1_TRINITY_DN11687_c0_g1_i1.p1	K01181	E3.2.1.8, xynA; endo-1,4-beta-xylanase [EC:3.2.1.8]	K09180 Brite Hierarchies	K09191 Unclassified: metabolism	K99980 Enzymes with EC numbers	CBM_10		Glyco_hydro_10	45470000	888710000	19.545
B1.1_TRINITY_DN11690_c1_g1_i1.p1	K00888	PI4KA; phosphatidylinositol 4-kinase A [EC:2.7.1.67]	K09100 Metabolism	K09101 Carbohydrate metabolism	K00562 Inositol phosphate metabolism [PATH:ko00562]				4747100	0	0
B1.1_TRINITY_DN11705_c4_g1_i1.p1	K02932	RP-L5e, RPL5; large subunit ribosomal protein L5e	K09120 Genetic Information Processing	K09122 Translation	K03010 Ribosome [PATH:ko03010]			PTZ00069	4947400000	119557000	0.0241656
B1.1_TRINITY_DN11705_c5_g1_i1.p1	K13993	HSP20; HSP20 family protein	K09120 Genetic Information Processing	K09123 Folding, sorting and degradation	K04141 Protein processing in endoplasmic reticulum [PATH:ko04141]			ACD_sHsps-like	0	4315800
B1.1_TRINITY_DN1171_c0_g1_i1.p1								PhoE	6428700	6216800	0.967038
B1.1_TRINITY_DN11723_c0_g1_i1.p2									24750000	0	0
B1.1_TRINITY_DN11724_c1_g1_i1.p1									1375000	0	0
B1.1_TRINITY_DN1173_c0_g1_i4.p1									503340000	710880000	1.41233
B1.1_TRINITY_DN1173_c1_g1_i1.p1	K03233	EEF1G; elongation factor 1-gamma	K09160 Human Diseases	K09171 Infectious disease: bacterial	K05134 Legionellosis [PATH:ko05134]			GST_C_EF1Bgamma_like	4.5664e+09	212512000	0.0465382
B1.1_TRINITY_DN1173_c1_g2_i1.p1	K03233	EEF1G; elongation factor 1-gamma	K09160 Human Diseases	K09171 Infectious disease: bacterial	K05134 Legionellosis [PATH:ko05134]			EF1G	3.1869e+09	262010000	0.0822147
B1.1_TRINITY_DN1173_c3_g1_i1.p1	K11279	NAP1L1, NRP; nucleosome assembly protein 1-like 1	K09180 Brite Hierarchies	K09182 Protein families: genetic information processing	K03036 Chromosome and associated proteins [BR:ko03036]			NAP	443200000	9944000	0.0224368
B1.1_TRINITY_DN1174_c0_g1_i5.p1	K01681	ACO, acnA; aconitate hydratase [EC:4.2.1.3]	K09100 Metabolism	K09101 Carbohydrate metabolism	K00020 Citrate cycle (TCA cycle) [PATH:ko00020]			aconitase_mito	475080000	220759000	0.464678
B1.1_TRINITY_DN11740_c0_g1_i1.p1									34572000	0	0
B1.1_TRINITY_DN11740_c0_g1_i6.p1									554490000	7318800	0.0131992
B1.1_TRINITY_DN11745_c0_g1_i1.p1	K19668	CBH2, cbhA; cellulose 1,4-beta-cellobiosidase [EC:3.2.1.91]	K09100 Metabolism	K09101 Carbohydrate metabolism	K00500 Starch and sucrose metabolism [PATH:ko00500]		GH6	Glyco_hydro_6	109154000	9.9652e+09	91.2949
B1.1_TRINITY_DN11758_c0_g1_i4.p1	K02937	RP-L7e, RPL7; large subunit ribosomal protein L7e	K09120 Genetic Information Processing	K09122 Translation	K03010 Ribosome [PATH:ko03010]			uL30_euk	4759300	0	0
B1.1_TRINITY_DN1176_c0_g1_i1.p1									0	11264000
B1.1_TRINITY_DN1178_c2_g1_i1.p1	K00844	HK; hexokinase [EC:2.7.1.1]	K09100 Metabolism	K09101 Carbohydrate metabolism	K00010 Glycolysis / Gluconeogenesis [PATH:ko00010]			COG5026	3.6089e+09	728890000	0.20197
B1.1_TRINITY_DN1178_c2_g2_i1.p1	K00844	HK; hexokinase [EC:2.7.1.1]	K09100 Metabolism	K09101 Carbohydrate metabolism	K00010 Glycolysis / Gluconeogenesis [PATH:ko00010]			COG5026	1.82045e+09	156578000	0.0860106
B1.1_TRINITY_DN11793_c0_g2_i1.p1									0	2481500
B1.1_TRINITY_DN11795_c0_g2_i1.p1	K12620	LSM1; U6 snRNA-associated Sm-like protein LSm1	K09120 Genetic Information Processing	K09123 Folding, sorting and degradation	K03018 RNA degradation [PATH:ko03018]			LSm1	6131400	7331600	1.19575
B1.1_TRINITY_DN118_c1_g1_i2.p1	K03687	GRPE; molecular chaperone GrpE	K09180 Brite Hierarchies	K09182 Protein families: genetic information processing	K03110 Chaperones and folding catalysts [BR:ko03110]			GrpE	145981000	20449300	0.140082
B1.1_TRINITY_DN1181_c1_g1_i1.p1								PKS	60244000	0	0
B1.1_TRINITY_DN11817_c0_g1_i2.p1	K05955	FNTA; protein farnesyltransferase/geranylgeranyltransferase type-1 subunit alpha [EC:2.5.1.58 2.5.1.59]	K09100 Metabolism	K09109 Metabolism of terpenoids and polyketides	K00900 Terpenoid backbone biosynthesis [PATH:ko00900]			PLN02789	19618900	1310400	0.0667927
B1.1_TRINITY_DN11821_c0_g1_i1.p1	K12876	RBM8A, Y14; RNA-binding protein 8A	K09120 Genetic Information Processing	K09121 Transcription	K03040 Spliceosome [PATH:ko03040]			RRM_RBM8	41451000	82408000	1.98808
B1.1_TRINITY_DN11824_c0_g1_i1.p1									5126800	0	0
B1.1_TRINITY_DN11827_c0_g1_i1.p1									0	17229100
B1.1_TRINITY_DN11827_c0_g2_i2.p1									0	247110000
B1.1_TRINITY_DN11827_c0_g2_i5.p1									0	3162900
B1.1_TRINITY_DN11827_c0_g3_i2.p1									990050	19551500	19.748
B1.1_TRINITY_DN11834_c0_g1_i1.p1	K24971	NEMF, RQC2; nuclear export mediator factor NEMF	K09180 Brite Hierarchies	K09182 Protein families: genetic information processing	K03009 Ribosome biogenesis [BR:ko03009]			DUF3441	2109700	0	0
B1.1_TRINITY_DN1184_c0_g3_i3.p1	K14820	BRX1, BRIX1; ribosome biogenesis protein BRX1	K09180 Brite Hierarchies	K09182 Protein families: genetic information processing	K03009 Ribosome biogenesis [BR:ko03009]			BRX1	8200600	0	0
B1.1_TRINITY_DN11841_c0_g1_i3.p1									4373000	52115300	11.9175
B1.1_TRINITY_DN11841_c0_g1_i3.p2									1539500	67176300	43.6351
B1.1_TRINITY_DN11848_c0_g1_i1.p1									18996000	0	0
B1.1_TRINITY_DN11854_c0_g1_i3.p1	K10396	KIF5; kinesin family member 5	K09140 Cellular Processes	K09141 Transport and catabolism	K04144 Endocytosis [PATH:ko04144]			KISc_KHC_KIF5	40427000	0	0
B1.1_TRINITY_DN11856_c0_g2_i1.p1	K02908	RP-L30e, RPL30; large subunit ribosomal protein L30e	K09120 Genetic Information Processing	K09122 Translation	K03010 Ribosome [PATH:ko03010]			PTZ00106	1478270000	126690000	0.0857015
B1.1_TRINITY_DN11864_c2_g1_i1.p1	K14536	RIA1; ribosome assembly protein 1 [EC:3.6.5.-]	K09120 Genetic Information Processing	K09122 Translation	K03008 Ribosome biogenesis in eukaryotes [PATH:ko03008]			PTZ00416	25180000	0	0
B1.1_TRINITY_DN11885_c0_g1_i1.p1									66526000	0	0
B1.1_TRINITY_DN11894_c0_g1_i1.p1	K02875	RP-L14e, RPL14; large subunit ribosomal protein L14e	K09120 Genetic Information Processing	K09122 Translation	K03010 Ribosome [PATH:ko03010]			PTZ00065	2502000000	187255000	0.0748421
B1.1_TRINITY_DN11899_c0_g1_i2.p1									15036500	0	0
B1.1_TRINITY_DN119_c0_g1_i4.p1								Clathrin_lg_ch	84363000	25048700	0.296916
B1.1_TRINITY_DN119_c1_g1_i6.p1									3395900	1707000	0.502665
B1.1_TRINITY_DN119_c2_g1_i1.p1	K01705	LYS4; homoaconitate hydratase [EC:4.2.1.36]	K09100 Metabolism	K09105 Amino acid metabolism	K00300 Lysine biosynthesis [PATH:ko00300]			h_aconitase	923720000	783640000	0.848352
B1.1_TRINITY_DN11910_c0_g2_i5.p1	K03245	EIF3J; translation initiation factor 3 subunit J	K09180 Brite Hierarchies	K09182 Protein families: genetic information processing	K03009 Ribosome biogenesis [BR:ko03009]			eIF3_subunit	241120000	17276200	0.0716498
B1.1_TRINITY_DN11913_c1_g1_i1.p1									2771200	0	0
B1.1_TRINITY_DN11928_c0_g1_i1.p1								Stealth_CR2	23595000	0	0
B1.1_TRINITY_DN11954_c0_g1_i1.p1	K10410	DNALI; dynein axonemal light intermediate chain 1	K09160 Human Diseases	K09164 Neurodegenerative disease				Ax_dynein_light	26696000	5658200	0.211949
B1.1_TRINITY_DN11972_c0_g1_i2.p2	K02943	RP-LP2, RPLP2; large subunit ribosomal protein LP2	K09120 Genetic Information Processing	K09122 Translation	K03010 Ribosome [PATH:ko03010]			Ribosomal_P2	1279440000	187307000	0.146398
B1.1_TRINITY_DN11979_c0_g1_i1.p1								E_set_AMPKbeta_like_N	24458600	4618200	0.188817
B1.1_TRINITY_DN11986_c1_g1_i1.p1	K08332	VAC8; vacuolar protein 8	K09180 Brite Hierarchies	K09182 Protein families: genetic information processing	K04131 Membrane trafficking [BR:ko04131]				30087000	0	0
B1.1_TRINITY_DN11993_c0_g1_i5.p1									10280000	3863900	0.375866
B1.1_TRINITY_DN11996_c3_g1_i1.p1	K10356	MYO1; myosin I	K09160 Human Diseases	K09171 Infectious disease: bacterial	K05130 Pathogenic Escherichia coli infection [PATH:ko05130]			MYSc_Myo1	5293300	0	0
B1.1_TRINITY_DN12_c0_g1_i5.p1	K19668	CBH2, cbhA; cellulose 1,4-beta-cellobiosidase [EC:3.2.1.91]	K09100 Metabolism	K09101 Carbohydrate metabolism	K00500 Starch and sucrose metabolism [PATH:ko00500]		GH6	Glyco_hydro_6	0	2937000
B1.1_TRINITY_DN12_c0_g1_i8.p1	K19668	CBH2, cbhA; cellulose 1,4-beta-cellobiosidase [EC:3.2.1.91]	K09100 Metabolism	K09101 Carbohydrate metabolism	K00500 Starch and sucrose metabolism [PATH:ko00500]		GH6	Glyco_hydro_6	0	825036000
B1.1_TRINITY_DN12_c1_g1_i1.p1						CBM_10	GH48	Glyco_hydro_48	20770600	4.4615e+09	214.799
B1.1_TRINITY_DN12_c1_g1_i11.p1						CBM_10	GH48	Glyco_hydro_48	0	513170000
B1.1_TRINITY_DN12_c1_g1_i2.p1						CBM_10	GH48	Glyco_hydro_48	0	320186800
B1.1_TRINITY_DN12_c1_g1_i4.p1						CBM_10	GH48	Glyco_hydro_48	0	198810000
B1.1_TRINITY_DN12_c1_g1_i6.p1						CBM_10	GH48	Glyco_hydro_48	317720000	34480000000	108.523
B1.1_TRINITY_DN12_c1_g2_i1.p1						CBM_10		CotH	0	61609000
B1.1_TRINITY_DN12_c5_g1_i2.p1						CBM_10		CotH	7494100	42544400	5.67705
B1.1_TRINITY_DN12_c5_g2_i1.p1						CBM_10	CE16+fungi_doc	fatty_acyltransferase_like	42284000	979710000	23.1698
B1.1_TRINITY_DN1202_c0_g2_i1.p1									27204000	0	0
B1.1_TRINITY_DN1202_c3_g1_i2.p1									22037000	0	0
B1.1_TRINITY_DN12035_c0_g1_i2.p1	K04072	adhE; acetaldehyde dehydrogenase / alcohol dehydrogenase [EC:1.2.1.10 1.1.1.1]	K09100 Metabolism	K09101 Carbohydrate metabolism	K00010 Glycolysis / Gluconeogenesis [PATH:ko00010]			AAD_C	1538080000	282140000	0.183436
B1.1_TRINITY_DN12040_c0_g1_i1.p1							CE4	CE4_ClCDA_like	0	14034500
B1.1_TRINITY_DN1205_c2_g1_i1.p1									489970	0	0
B1.1_TRINITY_DN12062_c0_g2_i1.p1								nuc_hydro_CeIAG	1012800	0	0
B1.1_TRINITY_DN12071_c0_g1_i2.p1	K23336	ARMC8; armadillo repeat-containing protein 8	K09180 Brite Hierarchies	K09182 Protein families: genetic information processing	K04121 Ubiquitin system [BR:ko04121]			COG5369	7042200	0	0
B1.1_TRINITY_DN12073_c0_g1_i1.p1									0	31758300
B1.1_TRINITY_DN1208_c0_g1_i8.p1	K06215	pdxS, pdx1; pyridoxal 5'-phosphate synthase pdxS subunit [EC:4.3.3.6]	K09100 Metabolism	K09108 Metabolism of cofactors and vitamins	K00750 Vitamin B6 metabolism [PATH:ko00750]			PRK04180	3.5406e+09	2.30103e+09	0.649898
B1.1_TRINITY_DN1208_c0_g1_i9.p1	K06215	pdxS, pdx1; pyridoxal 5'-phosphate synthase pdxS subunit [EC:4.3.3.6]	K09100 Metabolism	K09108 Metabolism of cofactors and vitamins	K00750 Vitamin B6 metabolism [PATH:ko00750]			SOR_SNZ	0	21710000
B1.1_TRINITY_DN12088_c0_g1_i4.p1									1564900	16948200	10.8302
B1.1_TRINITY_DN1209_c0_g1_i3.p1	K06269	PPP1C; serine/threonine-protein phosphatase PP1 catalytic subunit [EC:3.1.3.16]	K09120 Genetic Information Processing	K09122 Translation	K03015 mRNA surveillance pathway [PATH:ko03015]			MPP_PP1_PPKL	4709400	0	0
B1.1_TRINITY_DN1209_c0_g2_i6.p1									77070000	0	0
B1.1_TRINITY_DN121_c0_g1_i2.p1	K21138	HDDC3; guanosine-3',5'-bis(diphosphate) 3'-pyrophosphohydrolase [EC:3.1.7.2]	K09100 Metabolism	K09104 Nucleotide metabolism	K00230 Purine metabolism [PATH:ko00230]			SpoT	22331000	2581300	0.115593
B1.1_TRINITY_DN12104_c0_g1_i6.p1	K10685	UBLE1B, SAE2, UBA2; ubiquitin-like 1-activating enzyme E1 B [EC:6.2.1.45]	K09120 Genetic Information Processing	K09123 Folding, sorting and degradation	K04120 Ubiquitin mediated proteolysis [PATH:ko04120]			Uba2_SUMO	1621500	0	0
B1.1_TRINITY_DN12107_c0_g1_i2.p1	K17496	TIM50; mitochondrial import inner membrane translocase subunit TIM50	K09180 Brite Hierarchies	K09182 Protein families: genetic information processing	K03029 Mitochondrial biogenesis [BR:ko03029]			NIF	6695800	0	0
B1.1_TRINITY_DN1211_c0_g1_i2.p1	K01267	DNPEP; aspartyl aminopeptidase [EC:3.4.11.21]	K09180 Brite Hierarchies	K09181 Protein families: metabolism	K01002 Peptidases and inhibitors [BR:ko01002]			M18_DAP	391690000	1271960000	3.24736
B1.1_TRINITY_DN12122_c0_g3_i1.p1	K16449	RGS; regulator of G-protein signaling	K09180 Brite Hierarchies	K09193 Unclassified: signaling and cellular processes	K99995 Signaling proteins			RGS	20954500	48945000	2.33578
B1.1_TRINITY_DN12123_c1_g1_i1.p1									7784120	0	0
B1.1_TRINITY_DN12140_c3_g1_i1.p1	K02941	RP-LP0, RPLP0; large subunit ribosomal protein LP0	K09120 Genetic Information Processing	K09122 Translation	K03010 Ribosome [PATH:ko03010]			PTZ00135	2.01781e+09	89342000	0.0442767
B1.1_TRINITY_DN12141_c0_g1_i2.p1								IPK	18715300	0	0
B1.1_TRINITY_DN12148_c0_g1_i4.p1	K10236	thuE, lpqY; trehalose/maltose transport system substrate-binding protein	K09130 Environmental Information Processing	K09131 Membrane transport	K02010 ABC transporters [PATH:ko02010]				15692200	0	0
B1.1_TRINITY_DN12151_c0_g3_i1.p1									8668900	0	0
B1.1_TRINITY_DN12153_c0_g1_i6.p1	K23336	ARMC8; armadillo repeat-containing protein 8	K09180 Brite Hierarchies	K09182 Protein families: genetic information processing	K04121 Ubiquitin system [BR:ko04121]				29189000	0	0
B1.1_TRINITY_DN12156_c0_g1_i3.p1	K03671	trxA; thioredoxin 1	K09150 Organismal Systems	K09151 Immune system	K04621 NOD-like receptor signaling pathway [PATH:ko04621]			TRX_family	305780000	387960000	1.26876
B1.1_TRINITY_DN12165_c0_g2_i7.p1	K12392	AP1B1; AP-1 complex subunit beta-1	K09140 Cellular Processes	K09141 Transport and catabolism	K04142 Lysosome [PATH:ko04142]			PTZ00429	34826000	0	0
B1.1_TRINITY_DN1218_c1_g3_i3.p1	K12586	RRP43, EXOSC8, OIP2; exosome complex component RRP43	K09120 Genetic Information Processing	K09123 Folding, sorting and degradation	K03018 RNA degradation [PATH:ko03018]			RNase_PH_RRP43	7246200	0	0
B1.1_TRINITY_DN12186_c0_g3_i4.p1								PWWP	51695000	0	0
B1.1_TRINITY_DN12199_c1_g1_i1.p1									0	3184900
B1.1_TRINITY_DN122_c0_g3_i2.p1	K01892	HARS, hisS; histidyl-tRNA synthetase [EC:6.1.1.21]	K09120 Genetic Information Processing	K09122 Translation	K00970 Aminoacyl-tRNA biosynthesis [PATH:ko00970]			PLN02972	209656000	7559000	0.0360543
B1.1_TRINITY_DN1220_c1_g1_i2.p1	K14297	NUP98, ADAR2, NUP116; nuclear pore complex protein Nup98-Nup96	K09120 Genetic Information Processing	K09122 Translation	K03013 Nucleocytoplasmic transport [PATH:ko03013]			Nup96	5140700	0	0
B1.1_TRINITY_DN12202_c0_g1_i3.p1	K01512	acyP; acylphosphatase [EC:3.6.1.7]	K09100 Metabolism	K09101 Carbohydrate metabolism	K00620 Pyruvate metabolism [PATH:ko00620]			Acylphosphatase	46569000	81576000	1.75172
B1.1_TRINITY_DN12205_c4_g1_i1.p1									3171600	13352000	4.20986
B1.1_TRINITY_DN1222_c1_g1_i1.p1	K08994	yneE, BEST; ion channel-forming bestrophin family protein	K09180 Brite Hierarchies	K09183 Protein families: signaling and cellular processes	K02000 Transporters [BR:ko02000]			YneE	0	18526000
B1.1_TRINITY_DN1224_c0_g1_i3.p1	K06990	MEMO1; MEMO1 family protein	K09180 Brite Hierarchies	K09183 Protein families: signaling and cellular processes	K04812 Cytoskeleton proteins [BR:ko04812]			MEMO_like	9700500	10323800	1.06425
B1.1_TRINITY_DN1225_c2_g1_i6.p1	K24242	NT5C3; 7-methylguanosine nucleotidase [EC:3.1.3.91]	K09100 Metabolism	K09104 Nucleotide metabolism	K00240 Pyrimidine metabolism [PATH:ko00240]			UMPH-1	32599600	10596000	0.325035
B1.1_TRINITY_DN12258_c0_g3_i1.p1									0	404200000
B1.1_TRINITY_DN1226_c0_g1_i8.p1	K24272	DENR, TMA22; density-regulated protein	K09180 Brite Hierarchies	K09182 Protein families: genetic information processing	K03019 Messenger RNA biogenesis [BR:ko03019]			DRP1	61426000	5097500	0.082986
B1.1_TRINITY_DN12260_c0_g1_i1.p1	K01809	manA, MPI; mannose-6-phosphate isomerase [EC:5.3.1.8]	K09100 Metabolism	K09101 Carbohydrate metabolism	K00051 Fructose and mannose metabolism [PATH:ko00051]			PLN02288	51015000	86717000	1.69983
B1.1_TRINITY_DN12260_c0_g1_i2.p1	K01809	manA, MPI; mannose-6-phosphate isomerase [EC:5.3.1.8]	K09100 Metabolism	K09101 Carbohydrate metabolism	K00051 Fructose and mannose metabolism [PATH:ko00051]			PLN02288	558550	0	0
B1.1_TRINITY_DN1228_c0_g3_i5.p1	K06666	TUP1; general transcriptional corepressor TUP1	K09130 Environmental Information Processing	K09132 Signal transduction	K04011 MAPK signaling pathway - yeast [PATH:ko04011]			WD40	9068400	5889900	0.649497
B1.1_TRINITY_DN1228_c0_g5_i1.p1									35945000	35737000	0.994213
B1.1_TRINITY_DN1229_c0_g1_i5.p1								FHA_MDC1	164557000	0	0
B1.1_TRINITY_DN1229_c1_g1_i1.p1								PLN03129	107945000000	82881000000	0.767808
B1.1_TRINITY_DN12293_c0_g1_i5.p1	K24523	CPNE5_8_9; copine 5/8/9	K09180 Brite Hierarchies	K09183 Protein families: signaling and cellular processes	K04990 Domain-containing proteins not elsewhere classified [BR:ko04990]			vWA_copine_like	31606000	14362000	0.454407
B1.1_TRINITY_DN123_c2_g1_i1.p1	K13993	HSP20; HSP20 family protein	K09120 Genetic Information Processing	K09123 Folding, sorting and degradation	K04141 Protein processing in endoplasmic reticulum [PATH:ko04141]			ACD_sHsps-like	5676600	0	0
B1.1_TRINITY_DN1231_c0_g1_i1.p1	K01728	pel; pectate lyase [EC:4.2.2.2]	K09100 Metabolism	K09101 Carbohydrate metabolism	K00040 Pentose and glucuronate interconversions [PATH:ko00040]		PL1_6	PelB	55438000	433328000	7.81644
B1.1_TRINITY_DN12311_c0_g1_i4.p1	K01179	E3.2.1.4; endoglucanase [EC:3.2.1.4]	K09100 Metabolism	K09101 Carbohydrate metabolism	K00500 Starch and sucrose metabolism [PATH:ko00500]			Glyco_hydro_9	0	629395000
B1.1_TRINITY_DN1232_c0_g1_i2.p1	K03234	EEF2; elongation factor 2	K09130 Environmental Information Processing	K09132 Signal transduction	K04152 AMPK signaling pathway [PATH:ko04152]			PTZ00416	21341600000	3.58138e+09	0.167812
B1.1_TRINITY_DN12341_c0_g1_i1.p1	K07936	RAN; GTP-binding nuclear protein Ran	K09120 Genetic Information Processing	K09122 Translation	K03013 Nucleocytoplasmic transport [PATH:ko03013]			PTZ00132	1615710000	196508000	0.121623
B1.1_TRINITY_DN12341_c1_g1_i1.p1	K07375	TUBB; tubulin beta	K09140 Cellular Processes	K09141 Transport and catabolism	K04145 Phagosome [PATH:ko04145]			PLN00220	280850000	0	0
B1.1_TRINITY_DN1237_c0_g1_i1.p1	K00793	ribE, RIB5; riboflavin synthase [EC:2.5.1.9]	K09100 Metabolism	K09108 Metabolism of cofactors and vitamins	K00740 Riboflavin metabolism [PATH:ko00740]			Riboflavin_synthase_like	10630300	102696000	9.66069
B1.1_TRINITY_DN12373_c0_g1_i1.p1	K03847	ALG12; alpha-1,6-mannosyltransferase [EC:2.4.1.260]	K09100 Metabolism	K09107 Glycan biosynthesis and metabolism	K00510 N-Glycan biosynthesis [PATH:ko00510]			Glyco_transf_22	55978000	0	0
B1.1_TRINITY_DN12386_c0_g1_i1.p1									2379410	0	0
B1.1_TRINITY_DN1241_c0_g1_i2.p1	K09613	COPS5, CSN5; COP9 signalosome complex subunit 5 [EC:3.4.-.-]	K09180 Brite Hierarchies	K09181 Protein families: metabolism	K01002 Peptidases and inhibitors [BR:ko01002]			MPN_RPN11_CSN5	19593400	0	0
B1.1_TRINITY_DN12427_c0_g1_i4.p1	K03695	clpB; ATP-dependent Clp protease ATP-binding subunit ClpB	K09150 Organismal Systems	K09149 Aging				chaperone_ClpB	433510000	7180800	0.0165643
B1.1_TRINITY_DN12430_c0_g1_i5.p1								TRX_family	19367900	0	0
B1.1_TRINITY_DN12431_c0_g1_i4.p1	K19998	SCFD1, SLY1; sec1 family domain-containing protein 1	K09180 Brite Hierarchies	K09182 Protein families: genetic information processing	K04131 Membrane trafficking [BR:ko04131]			SEC1	4621500	0	0
B1.1_TRINITY_DN12450_c1_g1_i2.p1									33141000	0	0
B1.1_TRINITY_DN12456_c0_g1_i3.p1	K01875	SARS, serS; seryl-tRNA synthetase [EC:6.1.1.11]	K09120 Genetic Information Processing	K09122 Translation	K00970 Aminoacyl-tRNA biosynthesis [PATH:ko00970]			PLN02678	257700000	14348000	0.0556771
B1.1_TRINITY_DN12456_c0_g1_i5.p1	K01875	SARS, serS; seryl-tRNA synthetase [EC:6.1.1.11]	K09120 Genetic Information Processing	K09122 Translation	K00970 Aminoacyl-tRNA biosynthesis [PATH:ko00970]			PLN02678	1693450000	125265000	0.0739703
B1.1_TRINITY_DN12462_c0_g1_i3.p1	K04409	PAK1; p21-activated kinase 1 [EC:2.7.11.1]	K09130 Environmental Information Processing	K09132 Signal transduction	K04010 MAPK signaling pathway [PATH:ko04010]			STKc_PAK	3825600	0	0
B1.1_TRINITY_DN12466_c0_g1_i2.p1								CotH	3289500	0	0
B1.1_TRINITY_DN1247_c2_g1_i1.p1	K07466	RFA1, RPA1, rpa; replication factor A1	K09120 Genetic Information Processing	K09124 Replication and repair	K03030 DNA replication [PATH:ko03030]			rpa1	9813700	0	0
B1.1_TRINITY_DN1249_c0_g1_i1.p1	K01866	YARS, tyrS; tyrosyl-tRNA synthetase [EC:6.1.1.1]	K09120 Genetic Information Processing	K09122 Translation	K00970 Aminoacyl-tRNA biosynthesis [PATH:ko00970]			PRK08560	834050000	71524000	0.0857551
B1.1_TRINITY_DN1249_c0_g2_i1.p1									3543200	0	0
B1.1_TRINITY_DN125_c0_g1_i12.p1	K04392	RAC1; Ras-related C3 botulinum toxin substrate 1	K09130 Environmental Information Processing	K09132 Signal transduction	K04010 MAPK signaling pathway [PATH:ko04010]			Rac1_like	577450000	0	0
B1.1_TRINITY_DN125_c0_g1_i13.p1	K04513	RHOA; Ras homolog gene family, member A	K09130 Environmental Information Processing	K09132 Signal transduction	K04011 MAPK signaling pathway - yeast [PATH:ko04011]			RhoA_like	884800000	16874000	0.019071
B1.1_TRINITY_DN125_c0_g1_i6.p1	K04513	RHOA; Ras homolog gene family, member A	K09130 Environmental Information Processing	K09132 Signal transduction	K04011 MAPK signaling pathway - yeast [PATH:ko04011]			RhoA_like	404450000	12079600	0.0298667
B1.1_TRINITY_DN12512_c0_g1_i5.p1	K03250	EIF3E, INT6; translation initiation factor 3 subunit E	K09160 Human Diseases	K09172 Infectious disease: viral				eIF3E	443570000	5818600	0.0131177
B1.1_TRINITY_DN12515_c0_g1_i3.p1	K00555	TRMT1, trm1; tRNA (guanine26-N2/guanine27-N2)-dimethyltransferase [EC:2.1.1.215 2.1.1.216]	K09180 Brite Hierarchies	K09182 Protein families: genetic information processing	K03016 Transfer RNA biogenesis [BR:ko03016]			TRM	5712600	0	0
B1.1_TRINITY_DN12520_c0_g1_i1.p1	K12879	THOC2; THO complex subunit 2	K09120 Genetic Information Processing	K09121 Transcription	K03040 Spliceosome [PATH:ko03040]			THOC2_N	1004400	0	0
B1.1_TRINITY_DN12520_c1_g1_i2.p1									0	13825000
B1.1_TRINITY_DN1253_c0_g1_i3.p1	K22197	BAF45A, PHF10; BRG1-associated factor 45A	K09160 Human Diseases	K09162 Cancer: specific types				PHD_BAZ1A	2972800	0	0
B1.1_TRINITY_DN12532_c6_g1_i1.p1									5510900	0	0
B1.1_TRINITY_DN12552_c1_g3_i1.p1									213984000	3270900	0.0152857
B1.1_TRINITY_DN12555_c0_g1_i1.p1	K00850	pfkA, PFK; 6-phosphofructokinase 1 [EC:2.7.1.11]	K09100 Metabolism	K09101 Carbohydrate metabolism	K00010 Glycolysis / Gluconeogenesis [PATH:ko00010]				64877000	0	0
B1.1_TRINITY_DN12557_c0_g1_i5.p1									1568300	0	0
B1.1_TRINITY_DN12565_c0_g1_i4.p1	K20069	NECAP1_2; adaptin ear-binding coat-associated protein 1/2	K09180 Brite Hierarchies	K09182 Protein families: genetic information processing	K04131 Membrane trafficking [BR:ko04131]			DUF1681	1980400	0	0
B1.1_TRINITY_DN1257_c0_g1_i1.p1	K11096	SNRPD2, SMD2; small nuclear ribonucleoprotein D2	K09120 Genetic Information Processing	K09121 Transcription	K03040 Spliceosome [PATH:ko03040]			Sm_D2	25101100	0	0
B1.1_TRINITY_DN12574_c0_g1_i5.p1									3515200	0	0
B1.1_TRINITY_DN12579_c1_g1_i2.p1								HINT_subgroup	25919800	88916000	3.43043
B1.1_TRINITY_DN12585_c0_g1_i4.p1	K03065	PSMC3, RPT5; 26S proteasome regulatory subunit T5	K09120 Genetic Information Processing	K09123 Folding, sorting and degradation	K03050 Proteasome [PATH:ko03050]			RPT1	379090000	33361400	0.0880039
B1.1_TRINITY_DN12590_c1_g1_i2.p1									60599000	917276400	15.1368
B1.1_TRINITY_DN126_c0_g1_i1.p1									977820	1518500	1.55294
B1.1_TRINITY_DN126_c0_g6_i2.p1	K09580	PDIA1, P4HB; protein disulfide-isomerase A1 [EC:5.3.4.1]	K09120 Genetic Information Processing	K09123 Folding, sorting and degradation	K04141 Protein processing in endoplasmic reticulum [PATH:ko04141]			ER_PDI_fam	8.4472e+09	1.59526e+10	1.88851
B1.1_TRINITY_DN126_c0_g7_i2.p1									1331020000	64406300	0.0483887
B1.1_TRINITY_DN1260_c0_g3_i1.p1									47316000	0	0
B1.1_TRINITY_DN1260_c1_g1_i2.p1	K01181	E3.2.1.8, xynA; endo-1,4-beta-xylanase [EC:3.2.1.8]	K09180 Brite Hierarchies	K09191 Unclassified: metabolism	K99980 Enzymes with EC numbers			Glyco_hydro_10	101936000	1486950000	14.5871
B1.1_TRINITY_DN12602_c0_g1_i3.p1								Ubl_ubiquitin_like	16952300	922710	0.0544298
B1.1_TRINITY_DN12606_c1_g1_i2.p1	K10357	MYO5; myosin V	K09160 Human Diseases	K09171 Infectious disease: bacterial	K05130 Pathogenic Escherichia coli infection [PATH:ko05130]			MYSc_Myo5	20807000	0	0
B1.1_TRINITY_DN12624_c0_g1_i1.p1									0	6871400
B1.1_TRINITY_DN1263_c0_g1_i4.p1									0	953040
B1.1_TRINITY_DN1263_c2_g1_i3.p1	K12471	EPN; epsin	K09140 Cellular Processes	K09141 Transport and catabolism	K04144 Endocytosis [PATH:ko04144]			ENTH_EpsinR	196240	765900	3.90287
B1.1_TRINITY_DN1263_c3_g1_i1.p1	K01393	NLN; neurolysin [EC:3.4.24.16]	K09150 Organismal Systems	K09152 Endocrine system				M3A_TOP	20841500	0	0
B1.1_TRINITY_DN12632_c0_g1_i1.p1								HSF_DNA-bind	832710	0	0
B1.1_TRINITY_DN12632_c1_g1_i2.p1	K01652	E2.2.1.6L, ilvB, ilvG, ilvI; acetolactate synthase I/II/III large subunit [EC:2.2.1.6]	K09100 Metabolism	K09101 Carbohydrate metabolism	K00650 Butanoate metabolism [PATH:ko00650]			acolac_lg	1334840000	113935000	0.0853548
B1.1_TRINITY_DN12655_c0_g1_i1.p1									2409800	584710	0.242638
B1.1_TRINITY_DN12656_c0_g1_i1.p1									791240	3720230	4.70177
B1.1_TRINITY_DN12667_c1_g1_i2.p1								Era_like	8252200	0	0
B1.1_TRINITY_DN12674_c0_g1_i1.p1	K03260	EIF4G; translation initiation factor 4G	K09160 Human Diseases	K09166 Cardiovascular disease				MIF4G	120380000	46400000	0.385446
B1.1_TRINITY_DN12680_c0_g1_i2.p1						CBM_10			0	164741100
B1.1_TRINITY_DN12684_c0_g1_i8.p1	K13091	RBM23_39; RNA-binding protein 23/39	K09180 Brite Hierarchies	K09182 Protein families: genetic information processing	K03041 Spliceosome [BR:ko03041]			SF-CC1	4349900	0	0
B1.1_TRINITY_DN12684_c1_g2_i1.p1									31840000	0	0
B1.1_TRINITY_DN1269_c0_g1_i8.p1	K11253	H3; histone H3	K09150 Organismal Systems	K09151 Immune system	K04613 Neutrophil extracellular trap formation [PATH:ko04613]			PTZ00018	433920000	0	0
B1.1_TRINITY_DN12699_c0_g1_i5.p1	K23038	ZC3H14; zinc finger CCCH domain-containing protein 14	K09180 Brite Hierarchies	K09182 Protein families: genetic information processing	K03019 Messenger RNA biogenesis [BR:ko03019]				293720000	209943000	0.714773
B1.1_TRINITY_DN127_c3_g1_i1.p1									0	6384700
B1.1_TRINITY_DN12722_c0_g1_i1.p1								SMC_prok_B	42190000	25857500	0.612882
B1.1_TRINITY_DN12734_c1_g2_i1.p1							CE4	CE4_ClCDA_like	462920000	75779000	0.163698
B1.1_TRINITY_DN1274_c0_g1_i2.p1									6065700	1006600	0.16595
B1.1_TRINITY_DN1276_c0_g1_i2.p1	K01069	gloB, gloC, HAGH; hydroxyacylglutathione hydrolase [EC:3.1.2.6]	K09100 Metabolism	K09101 Carbohydrate metabolism	K00620 Pyruvate metabolism [PATH:ko00620]			metallo-hydrolase-like_MBL-fold	88628000	55359000	0.624622
B1.1_TRINITY_DN12761_c0_g1_i1.p1	K12589	RRP42, EXOSC7; exosome complex component RRP42	K09120 Genetic Information Processing	K09123 Folding, sorting and degradation	K03018 RNA degradation [PATH:ko03018]			RNase_PH_RRP42	2159600	0	0
B1.1_TRINITY_DN12785_c0_g1_i2.p1									80909000	61678000	0.762313
B1.1_TRINITY_DN12799_c0_g1_i1.p1									1141200	0	0
B1.1_TRINITY_DN12799_c1_g1_i5.p1									653410	0	0
B1.1_TRINITY_DN12829_c0_g1_i3.p1									0	1524400
B1.1_TRINITY_DN12834_c1_g1_i1.p1									60951000	0	0
B1.1_TRINITY_DN12851_c0_g2_i1.p1									10328800	0	0
B1.1_TRINITY_DN1286_c0_g1_i2.p1									5191800	8869100	1.70829
B1.1_TRINITY_DN1286_c1_g1_i3.p1	K11996	MOCS3, UBA4; adenylyltransferase and sulfurtransferase [EC:2.7.7.80 2.8.1.11]	K09120 Genetic Information Processing	K09123 Folding, sorting and degradation	K04122 Sulfur relay system [PATH:ko04122]			ThiF_MoeB_HesA_family	25304500	0	0
B1.1_TRINITY_DN12865_c0_g1_i3.p1								LUC7	2742900	0	0
B1.1_TRINITY_DN1288_c1_g1_i2.p1	K01417	MEP; extracellular elastinolytic metalloproteinase [EC:3.4.24.-]	K09180 Brite Hierarchies	K09181 Protein families: metabolism	K01002 Peptidases and inhibitors [BR:ko01002]			Peptidase_M36	30884600	174340000	5.64488
B1.1_TRINITY_DN1290_c0_g1_i10.p1	K00384	trxB, TRR; thioredoxin reductase (NADPH) [EC:1.8.1.9]	K09100 Metabolism	K09106 Metabolism of other amino acids	K00450 Selenocompound metabolism [PATH:ko00450]			TRX_reduct	598790000	240139000	0.40104
B1.1_TRINITY_DN1290_c0_g1_i11.p1	K00384	trxB, TRR; thioredoxin reductase (NADPH) [EC:1.8.1.9]	K09100 Metabolism	K09106 Metabolism of other amino acids	K00450 Selenocompound metabolism [PATH:ko00450]			TRX_reduct	24557000	11745000	0.478275
B1.1_TRINITY_DN12902_c0_g1_i2.p1	K02977	RP-S27Ae, RPS27A, UBA80; ubiquitin-small subunit ribosomal protein S27Ae	K09120 Genetic Information Processing	K09122 Translation	K03010 Ribosome [PATH:ko03010]			Ubl_ubiquitin	16162200	17187000	1.06341
B1.1_TRINITY_DN12902_c0_g1_i4.p1	K02977	RP-S27Ae, RPS27A, UBA80; ubiquitin-small subunit ribosomal protein S27Ae	K09120 Genetic Information Processing	K09122 Translation	K03010 Ribosome [PATH:ko03010]			Ubl_ubiquitin	94711000	6945700	0.0733357
B1.1_TRINITY_DN12908_c1_g1_i2.p1									32614000	0	0
B1.1_TRINITY_DN1292_c0_g2_i1.p1									59233000	111317000	1.87931
B1.1_TRINITY_DN1293_c1_g1_i5.p1	K01939	purA, ADSS; adenylosuccinate synthase [EC:6.3.4.4]	K09100 Metabolism	K09104 Nucleotide metabolism	K00230 Purine metabolism [PATH:ko00230]			Adenylsucc_synt	1319930000	1500760000	1.137
B1.1_TRINITY_DN12947_c1_g2_i1.p1								CYK3	0	8686800
B1.1_TRINITY_DN1297_c1_g1_i2.p1	K15174	PAF1; RNA polymerase II-associated factor 1	K09130 Environmental Information Processing	K09132 Signal transduction	K04011 MAPK signaling pathway - yeast [PATH:ko04011]			Paf1	23252400	0	0
B1.1_TRINITY_DN1297_c2_g1_i5.p1	K13337	PEX19; peroxin-19	K09140 Cellular Processes	K09141 Transport and catabolism	K04146 Peroxisome [PATH:ko04146]			Pex19	605370	795100	1.31341
B1.1_TRINITY_DN1298_c1_g3_i1.p1									69809000	2776000	0.0397656
B1.1_TRINITY_DN12982_c0_g1_i1.p1	K13100	CWC22; pre-mRNA-splicing factor CWC22	K09180 Brite Hierarchies	K09182 Protein families: genetic information processing	K03041 Spliceosome [BR:ko03041]			MA3	786110	0	0
B1.1_TRINITY_DN12996_c7_g1_i1.p1	K24081	ZMYND15; zinc finger MYND domain-containing protein 15	K09180 Brite Hierarchies	K09182 Protein families: genetic information processing	K03036 Chromosome and associated proteins [BR:ko03036]			zf-MYND	9734500	0	0
B1.1_TRINITY_DN13_c0_g1_i19.p1								Sugar_tr	2389200	0	0
B1.1_TRINITY_DN13_c0_g1_i6.p1								Sugar_tr	1.18271e+10	264713000	0.0223819
B1.1_TRINITY_DN1301_c0_g1_i3.p1									5695840	0	0
B1.1_TRINITY_DN13028_c1_g1_i1.p1								Mplasa_alph_rch	10685000	2890100	0.270482
B1.1_TRINITY_DN1305_c0_g1_i2.p1	K00700	GBE1, glgB; 1,4-alpha-glucan branching enzyme [EC:2.4.1.18]	K09100 Metabolism	K09101 Carbohydrate metabolism	K00500 Starch and sucrose metabolism [PATH:ko00500]			PLN02447	70934000	8095700	0.11413
B1.1_TRINITY_DN1305_c11_g1_i1.p1									923130	0	0
B1.1_TRINITY_DN1305_c7_g1_i1.p1	K00698	CHS1; chitin synthase [EC:2.4.1.16]	K09100 Metabolism	K09101 Carbohydrate metabolism	K00520 Amino sugar and nucleotide sugar metabolism [PATH:ko00520]			Chitin_synth_2	768140	0	0
B1.1_TRINITY_DN13050_c0_g1_i3.p1								EFh	14518900	0	0
B1.1_TRINITY_DN13052_c1_g1_i2.p1								CDC_Septin	76769000	5371700	0.0699723
B1.1_TRINITY_DN13082_c0_g1_i1.p1									0	54598000
B1.1_TRINITY_DN13083_c0_g1_i10.p1	K14454	GOT1; aspartate aminotransferase, cytoplasmic [EC:2.6.1.1]	K09100 Metabolism	K09102 Energy metabolism	K00710 Carbon fixation in photosynthetic organisms [PATH:ko00710]			PLN02397	112342000	87278000	0.776896
B1.1_TRINITY_DN13084_c1_g1_i1.p1	K14802	DRS2, ATP8A; phospholipid-transporting ATPase [EC:7.6.2.1]	K09180 Brite Hierarchies	K09182 Protein families: genetic information processing	K03009 Ribosome biogenesis [BR:ko03009]				6102400	0	0
B1.1_TRINITY_DN13086_c7_g1_i1.p1									0	2792700
B1.1_TRINITY_DN13091_c0_g1_i3.p1									3166200	0	0
B1.1_TRINITY_DN1310_c0_g1_i2.p1	K17275	PLS1; plastin-1	K09180 Brite Hierarchies	K09183 Protein families: signaling and cellular processes	K04812 Cytoskeleton proteins [BR:ko04812]			SAC6	22784100	88526000	3.88543
B1.1_TRINITY_DN1311_c0_g2_i3.p1	K12823	DDX5, DBP2; ATP-dependent RNA helicase DDX5/DBP2 [EC:3.6.4.13]	K09120 Genetic Information Processing	K09121 Transcription	K03040 Spliceosome [PATH:ko03040]			PTZ00110	12335800	0	0
B1.1_TRINITY_DN1312_c0_g1_i1.p1	K08486	STX1B_2_3; syntaxin 1B/2/3	K09120 Genetic Information Processing	K09123 Folding, sorting and degradation	K04130 SNARE interactions in vesicular transport [PATH:ko04130]			COG5074	55503000	0	0
B1.1_TRINITY_DN13206_c1_g1_i1.p1	K14699	irtB, ybtQ; ATP-binding cassette, subfamily B, bacterial IrtB/YbtQ [EC:7.-.-.-]	K09130 Environmental Information Processing	K09131 Membrane transport	K02010 ABC transporters [PATH:ko02010]			ABCC_ATM1_transporter	64649000	0	0
B1.1_TRINITY_DN1321_c0_g1_i1.p1	K06269	PPP1C; serine/threonine-protein phosphatase PP1 catalytic subunit [EC:3.1.3.16]	K09120 Genetic Information Processing	K09122 Translation	K03015 mRNA surveillance pathway [PATH:ko03015]			MPP_PP1_PPKL	424890000	30050400	0.0707251
B1.1_TRINITY_DN13226_c0_g2_i1.p1									236940	12498000	52.7475
B1.1_TRINITY_DN1323_c0_g1_i13.p1	K17301	COPB1, SEC26; coatomer subunit beta	K09180 Brite Hierarchies	K09182 Protein families: genetic information processing	K04131 Membrane trafficking [BR:ko04131]			Coatomer_b_Cpla	13529700	0	0
B1.1_TRINITY_DN1323_c0_g1_i17.p2	K17301	COPB1, SEC26; coatomer subunit beta	K09180 Brite Hierarchies	K09182 Protein families: genetic information processing	K04131 Membrane trafficking [BR:ko04131]				4886220	0	0
B1.1_TRINITY_DN1323_c0_g2_i1.p1	K17301	COPB1, SEC26; coatomer subunit beta	K09180 Brite Hierarchies	K09182 Protein families: genetic information processing	K04131 Membrane trafficking [BR:ko04131]				75460000	0	0
B1.1_TRINITY_DN1323_c1_g1_i1.p1	K26731							PLN03159	24250000	0	0
B1.1_TRINITY_DN13241_c0_g1_i1.p1	K05658	ABCB1, CD243; ATP-binding cassette, subfamily B (MDR/TAP), member 1 [EC:7.6.2.2]	K09130 Environmental Information Processing	K09131 Membrane transport	K02010 ABC transporters [PATH:ko02010]			ABC_MTABC3_MDL1_MDL2	29443000	0	0
B1.1_TRINITY_DN13241_c0_g1_i3.p1	K05658	ABCB1, CD243; ATP-binding cassette, subfamily B (MDR/TAP), member 1 [EC:7.6.2.2]	K09130 Environmental Information Processing	K09131 Membrane transport	K02010 ABC transporters [PATH:ko02010]			ABC_MTABC3_MDL1_MDL2	9111300	0	0
B1.1_TRINITY_DN1326_c0_g2_i3.p1									1757910	3154540	1.79448
B1.1_TRINITY_DN1326_c5_g1_i1.p1	K04512	DAAM; dishevelled associated activator of morphogenesis	K09130 Environmental Information Processing	K09132 Signal transduction	K04310 Wnt signaling pathway [PATH:ko04310]			Drf_GBD	0	631530
B1.1_TRINITY_DN13267_c0_g2_i2.p1	K10352	MYH9s; myosin heavy chain 9/10/11/14	K09140 Cellular Processes	K09144 Cellular community - eukaryotes	K04530 Tight junction [PATH:ko04530]			MYSc_class_II	809240000	87696100	0.108368
B1.1_TRINITY_DN1327_c1_g1_i2.p1								EEP-1	4561700	0	0
B1.1_TRINITY_DN1329_c1_g1_i1.p1	K03105	SRP19; signal recognition particle subunit SRP19	K09120 Genetic Information Processing	K09123 Folding, sorting and degradation	K03060 Protein export [PATH:ko03060]			SRP19	1473700	0	0
B1.1_TRINITY_DN1330_c0_g1_i3.p1	K20046	SLA1; actin cytoskeleton-regulatory complex protein SLA1	K09180 Brite Hierarchies	K09182 Protein families: genetic information processing	K04131 Membrane trafficking [BR:ko04131]				13357500	0	0
B1.1_TRINITY_DN1330_c0_g2_i1.p1								DUF3844	563570000	1278910000	2.2693
B1.1_TRINITY_DN1330_c2_g1_i1.p1									4644800	3293300	0.709029
B1.1_TRINITY_DN13302_c0_g1_i1.p1	K19668	CBH2, cbhA; cellulose 1,4-beta-cellobiosidase [EC:3.2.1.91]	K09100 Metabolism	K09101 Carbohydrate metabolism	K00500 Starch and sucrose metabolism [PATH:ko00500]		GH6	Glyco_hydro_6	0	6218000
B1.1_TRINITY_DN1332_c2_g1_i1.p1									799840	433970	0.542571
B1.1_TRINITY_DN13325_c6_g1_i1.p1	K00264	GLT1; glutamate synthase (NADH) [EC:1.4.1.14]	K09100 Metabolism	K09102 Energy metabolism	K00910 Nitrogen metabolism [PATH:ko00910]			gltB_C	33634800	3232500	0.0961058
B1.1_TRINITY_DN1333_c0_g1_i3.p1	K17278	PGRMC1_2; membrane-associated progesterone receptor component	K09180 Brite Hierarchies	K09183 Protein families: signaling and cellular processes	K04147 Exosome [BR:ko04147]				206956000	698950000	3.37729
B1.1_TRINITY_DN1333_c1_g1_i2.p1	K12198	CHMP5, VPS60; charged multivesicular body protein 5	K09140 Cellular Processes	K09141 Transport and catabolism	K04144 Endocytosis [PATH:ko04144]			PTZ00464	20020100	0	0
B1.1_TRINITY_DN1334_c0_g1_i1.p1	K10356	MYO1; myosin I	K09160 Human Diseases	K09171 Infectious disease: bacterial	K05130 Pathogenic Escherichia coli infection [PATH:ko05130]			MYSc_Myo1	16241100	0	0
B1.1_TRINITY_DN1336_c2_g1_i1.p1	K14793	RRP9; ribosomal RNA-processing protein 9	K09180 Brite Hierarchies	K09182 Protein families: genetic information processing	K03009 Ribosome biogenesis [BR:ko03009]				5535900	0	0
B1.1_TRINITY_DN13365_c0_g1_i2.p1	K20307	TRAPPC10, TRS130; trafficking protein particle complex subunit 10	K09180 Brite Hierarchies	K09182 Protein families: genetic information processing	K04131 Membrane trafficking [BR:ko04131]				4392800	0	0
B1.1_TRINITY_DN13368_c0_g2_i5.p1	K05349	bglX; beta-glucosidase [EC:3.2.1.21]	K09100 Metabolism	K09101 Carbohydrate metabolism	K00500 Starch and sucrose metabolism [PATH:ko00500]		GH3	BglX	31890000	35808000	1.12286
B1.1_TRINITY_DN13396_c0_g1_i1.p1								HMG-box_SOX	257100000	14395500	0.0559918
B1.1_TRINITY_DN134_c0_g1_i1.p2									2265020	0	0
B1.1_TRINITY_DN134_c0_g3_i1.p1									0	12491000
B1.1_TRINITY_DN134_c2_g1_i3.p1	K24983	G3BP2; Ras GTPase-activating protein-binding protein 2	K09180 Brite Hierarchies	K09182 Protein families: genetic information processing	K03019 Messenger RNA biogenesis [BR:ko03019]			NTF2	79904000	10809300	0.135279
B1.1_TRINITY_DN134_c3_g1_i1.p2									8615900	0	0
B1.1_TRINITY_DN1340_c0_g1_i6.p1	K04348	PPP3C, CNA; serine/threonine-protein phosphatase 2B catalytic subunit [EC:3.1.3.16]	K09130 Environmental Information Processing	K09132 Signal transduction	K04010 MAPK signaling pathway [PATH:ko04010]			MPP_PP2B	259990000	19391700	0.0745863
B1.1_TRINITY_DN1340_c1_g1_i3.p1	K04523	UBQLN, DSK2; ubiquilin	K09120 Genetic Information Processing	K09123 Folding, sorting and degradation	K04141 Protein processing in endoplasmic reticulum [PATH:ko04141]			Ubl_Dsk2p_like	15472900	24698700	1.59626
B1.1_TRINITY_DN1340_c2_g1_i2.p1								COG5038	409610000	152018000	0.371129
B1.1_TRINITY_DN13408_c1_g2_i3.p1									226777000	63440000	0.279746
B1.1_TRINITY_DN13417_c4_g1_i1.p1									2639700	0	0
B1.1_TRINITY_DN1342_c1_g2_i2.p1	K04072	adhE; acetaldehyde dehydrogenase / alcohol dehydrogenase [EC:1.2.1.10 1.1.1.1]	K09100 Metabolism	K09101 Carbohydrate metabolism	K00010 Glycolysis / Gluconeogenesis [PATH:ko00010]			PRK13805	25735000000	6.326e+09	0.245813
B1.1_TRINITY_DN13427_c2_g1_i2.p1									0	15210100
B1.1_TRINITY_DN1346_c4_g1_i2.p1									8578500	0	0
B1.1_TRINITY_DN13460_c1_g1_i1.p1	K10592	HUWE1, MULE, ARF-BP1; E3 ubiquitin-protein ligase HUWE1 [EC:2.3.2.26]	K09120 Genetic Information Processing	K09123 Folding, sorting and degradation	K04120 Ubiquitin mediated proteolysis [PATH:ko04120]			DUF913	2181200	0	0
B1.1_TRINITY_DN13462_c0_g2_i2.p1	K10413	DYNC1H; dynein cytoplasmic 1 heavy chain	K09140 Cellular Processes	K09141 Transport and catabolism	K04145 Phagosome [PATH:ko04145]			AAA_lid_11	11927700	0	0
B1.1_TRINITY_DN1348_c2_g1_i1.p1	K12856	PRPF8, PRP8; pre-mRNA-processing factor 8	K09120 Genetic Information Processing	K09121 Transcription	K03040 Spliceosome [PATH:ko03040]			PRO8NT	10115800	0	0
B1.1_TRINITY_DN13494_c0_g1_i3.p1									101894000	1014410000	9.95554
B1.1_TRINITY_DN1350_c6_g1_i1.p1	K18195	RGL4, rhiE; rhamnogalacturonan endolyase [EC:4.2.2.23]	K09180 Brite Hierarchies	K09191 Unclassified: metabolism	K99980 Enzymes with EC numbers	CBM_10	PL4+fungi_doc	RGL4_C	86660000	860130000	9.92534
B1.1_TRINITY_DN13507_c0_g1_i1.p1									50757000	0	0
B1.1_TRINITY_DN13518_c0_g1_i1.p1	K19668	CBH2, cbhA; cellulose 1,4-beta-cellobiosidase [EC:3.2.1.91]	K09100 Metabolism	K09101 Carbohydrate metabolism	K00500 Starch and sucrose metabolism [PATH:ko00500]	CBM_10	fungi_doc+GH6	Glyco_hydro_6	0	8116900
B1.1_TRINITY_DN13524_c0_g1_i2.p1									0	8553080
B1.1_TRINITY_DN1353_c0_g1_i2.p1	K12812	DDX39B, UAP56, SUB2; ATP-dependent RNA helicase UAP56/SUB2 [EC:3.6.4.13]	K09120 Genetic Information Processing	K09121 Transcription	K03040 Spliceosome [PATH:ko03040]			DEADc_DDX39	798660000	25996400	0.03255
B1.1_TRINITY_DN13530_c0_g1_i1.p1									86277000	427195000	4.95144
B1.1_TRINITY_DN13537_c0_g1_i6.p1						CBM_10		CBM_10	0	157630000
B1.1_TRINITY_DN13545_c2_g1_i1.p1									60163000	1940170000	32.2486
B1.1_TRINITY_DN1355_c0_g1_i2.p1	K07126	K07126; uncharacterized protein	K09180 Brite Hierarchies	K09194 Poorly characterized	K99997 Function unknown			TPR	42538000	0	0
B1.1_TRINITY_DN1355_c1_g2_i2.p1								UBX	12627700	997270	0.0789748
B1.1_TRINITY_DN1355_c5_g1_i1.p1									43047000	6441300	0.149634
B1.1_TRINITY_DN13557_c0_g1_i1.p1									3412100	0	0
B1.1_TRINITY_DN13557_c4_g1_i1.p1	K12855	PRPF6, PRP6; pre-mRNA-processing factor 6	K09120 Genetic Information Processing	K09121 Transcription	K03040 Spliceosome [PATH:ko03040]			PRP1_N	4386500	0	0
B1.1_TRINITY_DN13570_c0_g1_i1.p1	K04514	ROCK1; Rho-associated protein kinase 1 [EC:2.7.11.1]	K09130 Environmental Information Processing	K09132 Signal transduction	K04350 TGF-beta signaling pathway [PATH:ko04350]			STKc_DMPK_like	2483460	0	0
B1.1_TRINITY_DN1358_c0_g1_i7.p1	K12897	TRA2; transformer-2 protein	K09120 Genetic Information Processing	K09121 Transcription	K03040 Spliceosome [PATH:ko03040]			RRM	109800000	2908400	0.0264882
B1.1_TRINITY_DN13580_c0_g1_i3.p1	K25058	CACTIN; cactin	K09180 Brite Hierarchies	K09182 Protein families: genetic information processing	K03041 Spliceosome [BR:ko03041]			CactinC_cactus	7522300	0	0
B1.1_TRINITY_DN1359_c1_g1_i1.p2								S_TKc	72447000	0	0
B1.1_TRINITY_DN1359_c4_g2_i1.p1	K26544							SEC14	176007000	85335000	0.484839
B1.1_TRINITY_DN1359_c6_g1_i1.p1	K20221	IPO4, RANBP4; importin-4	K09120 Genetic Information Processing	K09122 Translation	K03013 Nucleocytoplasmic transport [PATH:ko03013]				206970000	3143900	0.0151901
B1.1_TRINITY_DN13591_c1_g1_i2.p1							CBM87		0	7023400
B1.1_TRINITY_DN13595_c2_g1_i1.p1	K01179	E3.2.1.4; endoglucanase [EC:3.2.1.4]	K09100 Metabolism	K09101 Carbohydrate metabolism	K00500 Starch and sucrose metabolism [PATH:ko00500]		GH5_4	Cellulase	0	33365000
B1.1_TRINITY_DN13615_c0_g2_i1.p1									17472000	0	0
B1.1_TRINITY_DN13618_c3_g1_i1.p1	K24730	CIAO1, CIA1; cytosolic iron-sulfur protein assembly protein CIAO1	K09180 Brite Hierarchies	K09183 Protein families: signaling and cellular processes	K04990 Domain-containing proteins not elsewhere classified [BR:ko04990]			WD40	10493600	4773500	0.454896
B1.1_TRINITY_DN13619_c0_g1_i4.p1	K01823	idi, IDI; isopentenyl-diphosphate Delta-isomerase [EC:5.3.3.2]	K09100 Metabolism	K09109 Metabolism of terpenoids and polyketides	K00900 Terpenoid backbone biosynthesis [PATH:ko00900]			PLN02552	43043000	1974700	0.0458774
B1.1_TRINITY_DN13619_c6_g1_i1.p1							CE4	CE4_ClCDA_like	34097000	590020000	17.3042
B1.1_TRINITY_DN13623_c0_g1_i1.p1								metallo-hydrolase-like_MBL-fold	502930000	36870800	0.073312
B1.1_TRINITY_DN13623_c7_g1_i1.p1	K03321	TC.SULP; sulfate permease, SulP family	K09180 Brite Hierarchies	K09183 Protein families: signaling and cellular processes	K02000 Transporters [BR:ko02000]				525010	0	0
B1.1_TRINITY_DN1363_c3_g1_i1.p1									0	585910
B1.1_TRINITY_DN1364_c0_g1_i5.p1	K20366	ERGIC2, ERV41; endoplasmic reticulum-Golgi intermediate compartment protein 2	K09180 Brite Hierarchies	K09182 Protein families: genetic information processing	K04131 Membrane trafficking [BR:ko04131]			COPIIcoated_ERV	21689500	0	0
B1.1_TRINITY_DN13659_c0_g1_i2.p1	K03237	EIF2S1; translation initiation factor 2 subunit 1	K09120 Genetic Information Processing	K09123 Folding, sorting and degradation	K04141 Protein processing in endoplasmic reticulum [PATH:ko04141]			PTZ00248	627730000	39514000	0.0629474
B1.1_TRINITY_DN1366_c0_g3_i2.p1	K10356	MYO1; myosin I	K09160 Human Diseases	K09171 Infectious disease: bacterial	K05130 Pathogenic Escherichia coli infection [PATH:ko05130]			MYSc	14354600	0	0
B1.1_TRINITY_DN13662_c0_g1_i6.p1	K01897	ACSL, fadD; long-chain acyl-CoA synthetase [EC:6.2.1.3]	K09100 Metabolism	K09103 Lipid metabolism	K00061 Fatty acid biosynthesis [PATH:ko00061]			LC-FACS_euk	227890000	158236000	0.694353
B1.1_TRINITY_DN13666_c0_g1_i2.p1	K17608	STRN1_3_4; striatin 1/3/4	K09130 Environmental Information Processing	K09132 Signal transduction	K04013 MAPK signaling pathway - fly [PATH:ko04013]			WD40	2964800	0	0
B1.1_TRINITY_DN13668_c0_g1_i3.p1	K14792	RRP5, PDCD11; rRNA biogenesis protein RRP5	K09180 Brite Hierarchies	K09182 Protein families: genetic information processing	K03009 Ribosome biogenesis [BR:ko03009]			S1_Rrp5_repeat_hs1_sc1	18303100	0	0
B1.1_TRINITY_DN13676_c0_g1_i4.p1									1150200	0	0
B1.1_TRINITY_DN13690_c1_g1_i1.p1	K08832	SRPK3, STK23; serine/threonine-protein kinase SRPK3 [EC:2.7.11.1]	K09180 Brite Hierarchies	K09181 Protein families: metabolism	K01001 Protein kinases [BR:ko01001]			STKc_SRPK	2413700	0	0
B1.1_TRINITY_DN1371_c0_g2_i4.p1								RanBD	27256600	597160	0.0219088
B1.1_TRINITY_DN13711_c0_g1_i5.p1									1935540	7205200	3.72258
B1.1_TRINITY_DN13713_c0_g1_i2.p1									1733300	0	0
B1.1_TRINITY_DN13717_c0_g1_i1.p1									43086000	1282500	0.029766
B1.1_TRINITY_DN13717_c0_g2_i1.p1									20308200	494710	0.0243601
B1.1_TRINITY_DN13719_c0_g1_i1.p1	K01694	TRP; tryptophan synthase [EC:4.2.1.20]	K09100 Metabolism	K09105 Amino acid metabolism	K00260 Glycine, serine and threonine metabolism [PATH:ko00260]			PRK04346	1347080000	280724000	0.208394
B1.1_TRINITY_DN13719_c1_g1_i2.p1								CAP_bacterial	19909800	0	0
B1.1_TRINITY_DN13723_c0_g1_i2.p1	K01408	IDE, ide; insulysin [EC:3.4.24.56]	K09160 Human Diseases	K09164 Neurodegenerative disease				Ptr	1632900	3483800	2.1335
B1.1_TRINITY_DN13733_c0_g1_i1.p1	K09142	SPOUT1; methyltransferase [EC:2.1.1.-]	K09180 Brite Hierarchies	K09182 Protein families: genetic information processing	K03036 Chromosome and associated proteins [BR:ko03036]			Methyltrn_RNA_3	2586000	0	0
B1.1_TRINITY_DN1374_c0_g2_i1.p1								Polysacc_synt_4	109592000	0	0
B1.1_TRINITY_DN13767_c0_g2_i1.p1	K00698	CHS1; chitin synthase [EC:2.4.1.16]	K09100 Metabolism	K09101 Carbohydrate metabolism	K00520 Amino sugar and nucleotide sugar metabolism [PATH:ko00520]			Chitin_synth_C	1648000	0	0
B1.1_TRINITY_DN13774_c0_g1_i3.p1	K14709	SLC39A1_2_3, ZIP1_2_3; solute carrier family 39 (zinc transporter), member 1/2/3	K09160 Human Diseases	K09164 Neurodegenerative disease				zip	3749700	0	0
B1.1_TRINITY_DN1379_c3_g1_i1.p1									21609000	0	0
B1.1_TRINITY_DN1380_c0_g1_i12.p1	K09129	K09129; uncharacterized protein	K09180 Brite Hierarchies	K09194 Poorly characterized	K99997 Function unknown			Adenosine_kin	144292000	208890000	1.44769
B1.1_TRINITY_DN1380_c0_g1_i6.p1	K11517	HAO; (S)-2-hydroxy-acid oxidase [EC:1.1.3.15]	K09100 Metabolism	K09101 Carbohydrate metabolism	K00630 Glyoxylate and dicarboxylate metabolism [PATH:ko00630]			FMN_dh	208542000	19853600	0.0952019
B1.1_TRINITY_DN13800_c4_g1_i1.p1	K00143	LYS2; L-2-aminoadipate reductase [EC:1.2.1.95]	K09100 Metabolism	K09105 Amino acid metabolism	K00300 Lysine biosynthesis [PATH:ko00300]			alpha_am_amid	435880000	35307700	0.0810033
B1.1_TRINITY_DN13814_c0_g2_i1.p1									32068000	373888000	11.6592
B1.1_TRINITY_DN13814_c0_g3_i1.p1									0	46931700
B1.1_TRINITY_DN13814_c1_g1_i6.p1	K18752	TNPO1, IPO2, KPNB2; transportin-1	K09120 Genetic Information Processing	K09122 Translation	K03013 Nucleocytoplasmic transport [PATH:ko03013]				7663000	0	0
B1.1_TRINITY_DN1383_c0_g1_i1.p1	K12626	LSM7; U6 snRNA-associated Sm-like protein LSm7	K09120 Genetic Information Processing	K09121 Transcription	K03040 Spliceosome [PATH:ko03040]			LSm7	8427300	13111800	1.55587
B1.1_TRINITY_DN1385_c0_g4_i1.p1	K21636	nrdD; ribonucleoside-triphosphate reductase (formate) [EC:1.1.98.6]	K09100 Metabolism	K09104 Nucleotide metabolism	K00230 Purine metabolism [PATH:ko00230]			PRK08271	77855000	2514100	0.0322921
B1.1_TRINITY_DN13856_c0_g1_i3.p1								CotH	86934000	553440000	6.36621
B1.1_TRINITY_DN1387_c0_g1_i2.p1									0	262740000
B1.1_TRINITY_DN13871_c0_g6_i1.p1	K10968	MNT2; alpha 1,3-mannosyltransferase [EC:2.4.1.-]	K09100 Metabolism	K09107 Glycan biosynthesis and metabolism	K00514 Other types of O-glycan biosynthesis [PATH:ko00514]			Mannosyl_trans3	6998200	0	0
B1.1_TRINITY_DN1388_c0_g1_i1.p1	K20353	SEC16; COPII coat assembly protein SEC16	K09180 Brite Hierarchies	K09182 Protein families: genetic information processing	K04131 Membrane trafficking [BR:ko04131]			Sec16_C	1518400	540640	0.356059
B1.1_TRINITY_DN1388_c0_g1_i2.p1									13301000	369390	0.0277716
B1.1_TRINITY_DN13891_c0_g1_i1.p1									7583200	44008000	5.80335
B1.1_TRINITY_DN13902_c0_g1_i1.p1	K14942	KHDRBS3, SLM2; KH domain-containing, RNA-binding, signal transduction-associated protein 3	K09180 Brite Hierarchies	K09182 Protein families: genetic information processing	K03041 Spliceosome [BR:ko03041]				12244300	0	0
B1.1_TRINITY_DN13915_c0_g1_i3.p1	K20790	NME5; nucleoside diphosphate kinase homolog 5	K09180 Brite Hierarchies	K09182 Protein families: genetic information processing	K03036 Chromosome and associated proteins [BR:ko03036]			NDPk5	754030	0	0
B1.1_TRINITY_DN1392_c0_g1_i2.p1							CBM87		0	7562800
B1.1_TRINITY_DN1393_c0_g1_i2.p1									2633360	0	0
B1.1_TRINITY_DN13937_c0_g1_i2.p1	K22337	TSL1, TPS3; trehalose 6-phosphate synthase complex regulatory subunit	K09100 Metabolism	K09101 Carbohydrate metabolism	K00500 Starch and sucrose metabolism [PATH:ko00500]			GT20_TPS	9668900	0	0
B1.1_TRINITY_DN13950_c2_g1_i1.p1								C2D_Tricalbin-like	119906000	36498700	0.304394
B1.1_TRINITY_DN13960_c0_g1_i2.p1	K14826	FPR3_4; FK506-binding nuclear protein [EC:5.2.1.8]	K09180 Brite Hierarchies	K09182 Protein families: genetic information processing	K03009 Ribosome biogenesis [BR:ko03009]			FkpA	107175000	3532500	0.0329601
B1.1_TRINITY_DN13960_c3_g1_i1.p1								DnaJ-X	7766000	0	0
B1.1_TRINITY_DN13970_c0_g1_i5.p1	K10251	HSD17B12, KAR, IFA38; 17beta-estradiol 17-dehydrogenase / very-long-chain 3-oxoacyl-CoA reductase [EC:1.1.1.62 1.1.1.330]	K09100 Metabolism	K09103 Lipid metabolism	K00062 Fatty acid elongation [PATH:ko00062]			17beta-HSD1_like_SDR_c	158861000	0	0
B1.1_TRINITY_DN1398_c0_g1_i4.p1									6291100	0	0
B1.1_TRINITY_DN13980_c1_g1_i1.p1	K12659	ARG56; N-acetyl-gamma-glutamyl-phosphate reductase / acetylglutamate kinase [EC:1.2.1.38 2.7.2.8]	K09100 Metabolism	K09105 Amino acid metabolism	K00220 Arginine biosynthesis [PATH:ko00220]			AAK_NAGK-fArgBP	1.85629e+09	473010000	0.254815
B1.1_TRINITY_DN13988_c6_g1_i1.p1	K02925	RP-L3e, RPL3; large subunit ribosomal protein L3e	K09120 Genetic Information Processing	K09122 Translation	K03010 Ribosome [PATH:ko03010]			PTZ00103	4.5872e+09	143959000	0.0313828
B1.1_TRINITY_DN1399_c1_g1_i2.p1	K10751	CHAF1B; chromatin assembly factor 1 subunit B	K09180 Brite Hierarchies	K09182 Protein families: genetic information processing	K03036 Chromosome and associated proteins [BR:ko03036]			WD40	3908400	745510	0.190746
B1.1_TRINITY_DN140_c0_g1_i1.p1	K17804	TIM44; mitochondrial import inner membrane translocase subunit TIM44	K09180 Brite Hierarchies	K09182 Protein families: genetic information processing	K03029 Mitochondrial biogenesis [BR:ko03029]			3a0801s03tim44	65708000	0	0
B1.1_TRINITY_DN140_c1_g1_i7.p1	K00290	LYS1; saccharopine dehydrogenase (NAD+, L-lysine forming) [EC:1.5.1.7]	K09100 Metabolism	K09105 Amino acid metabolism	K00300 Lysine biosynthesis [PATH:ko00300]			SDH	1072880000	733790000	0.683944
B1.1_TRINITY_DN14000_c0_g3_i1.p1									0	1674100
B1.1_TRINITY_DN14009_c2_g1_i1.p1	K00134	GAPDH, gapA; glyceraldehyde 3-phosphate dehydrogenase (phosphorylating) [EC:1.2.1.12]	K09100 Metabolism	K09101 Carbohydrate metabolism	K00010 Glycolysis / Gluconeogenesis [PATH:ko00010]			PLN02272	1188160000	55786000	0.0469516
B1.1_TRINITY_DN14014_c0_g1_i4.p1	K10420	DYNLT1_3; dynein light chain Tctex-type 1/3	K09160 Human Diseases	K09171 Infectious disease: bacterial	K05132 Salmonella infection [PATH:ko05132]			DLC-like_DYNLT1	17446400	0	0
B1.1_TRINITY_DN14035_c0_g2_i1.p1									39845000	22259000	0.55864
B1.1_TRINITY_DN14036_c0_g1_i3.p1									35485000	0	0
B1.1_TRINITY_DN1405_c0_g1_i3.p1	K01596	E4.1.1.32, pckA, PCK; phosphoenolpyruvate carboxykinase (GTP) [EC:4.1.1.32]	K09100 Metabolism	K09101 Carbohydrate metabolism	K00010 Glycolysis / Gluconeogenesis [PATH:ko00010]			PRK04210	10203100000	2900890000	0.284315
B1.1_TRINITY_DN1405_c0_g2_i4.p1	K01596	E4.1.1.32, pckA, PCK; phosphoenolpyruvate carboxykinase (GTP) [EC:4.1.1.32]	K09100 Metabolism	K09101 Carbohydrate metabolism	K00010 Glycolysis / Gluconeogenesis [PATH:ko00010]			PRK04210	1744260000	404351000	0.231818
B1.1_TRINITY_DN1405_c0_g2_i9.p1	K01596	E4.1.1.32, pckA, PCK; phosphoenolpyruvate carboxykinase (GTP) [EC:4.1.1.32]	K09100 Metabolism	K09101 Carbohydrate metabolism	K00010 Glycolysis / Gluconeogenesis [PATH:ko00010]			PRK04210	75367000000	84160000000	1.11667
B1.1_TRINITY_DN1406_c0_g1_i4.p1									26018000	1761400	0.0676993
B1.1_TRINITY_DN1406_c2_g1_i1.p1								cyclophilin_ABH_like	0	7295300
B1.1_TRINITY_DN14060_c0_g1_i1.p1								iPGM_like	58749000	0	0
B1.1_TRINITY_DN1407_c0_g1_i2.p1	K17261	CAP1_2, SRV2; adenylyl cyclase-associated protein	K09180 Brite Hierarchies	K09182 Protein families: genetic information processing	K04131 Membrane trafficking [BR:ko04131]			CAP_C	964350000	115006000	0.119258
B1.1_TRINITY_DN14083_c1_g1_i1.p1								PH-GRAM_WBP2	9240300	2009200	0.217439
B1.1_TRINITY_DN1409_c0_g2_i1.p1	K16944	SEPT7, CDC3; septin 7	K09160 Human Diseases	K09171 Infectious disease: bacterial	K05131 Shigellosis [PATH:ko05131]			CDC_Septin	206109000	6104700	0.0296188
B1.1_TRINITY_DN1409_c4_g1_i1.p1	K05284	PIGM; GPI mannosyltransferase 1 subunit M [EC:2.4.1.-]	K09100 Metabolism	K09107 Glycan biosynthesis and metabolism	K00563 Glycosylphosphatidylinositol (GPI)-anchor biosynthesis [PATH:ko00563]			PLN02841	4572100	0	0
B1.1_TRINITY_DN14095_c3_g1_i1.p1	K02989	RP-S5e, RPS5; small subunit ribosomal protein S5e	K09120 Genetic Information Processing	K09122 Translation	K03010 Ribosome [PATH:ko03010]			uS7_Eukaryote	3.8424e+09	129190000	0.0336222
B1.1_TRINITY_DN1410_c1_g2_i2.p1									0	20645700
B1.1_TRINITY_DN14136_c0_g1_i1.p1	K01537	ATP2C; P-type Ca2+ transporter type 2C [EC:7.2.2.10]	K09180 Brite Hierarchies	K09191 Unclassified: metabolism	K99980 Enzymes with EC numbers			MgtA	7213330	0	0
B1.1_TRINITY_DN14139_c5_g1_i1.p1	K14793	RRP9; ribosomal RNA-processing protein 9	K09180 Brite Hierarchies	K09182 Protein families: genetic information processing	K03009 Ribosome biogenesis [BR:ko03009]			WD40	10971100	0	0
B1.1_TRINITY_DN1415_c0_g1_i2.p1	K26216							Aha1_N	46320000	2286900	0.0493718
B1.1_TRINITY_DN14163_c0_g1_i1.p1								MADS_MEF2_like	7117900	0	0
B1.1_TRINITY_DN14166_c0_g2_i1.p1									5486700	0	0
B1.1_TRINITY_DN14166_c2_g1_i1.p1								EH	19644400	899720	0.0458003
B1.1_TRINITY_DN1422_c0_g1_i3.p1	K17757	CARKD; ATP-dependent NAD(P)H-hydrate dehydratase [EC:4.2.1.93]	K09180 Brite Hierarchies	K09191 Unclassified: metabolism	K99980 Enzymes with EC numbers			YXKO-related	26047000	0	0
B1.1_TRINITY_DN1424_c1_g1_i1.p1	K01181	E3.2.1.8, xynA; endo-1,4-beta-xylanase [EC:3.2.1.8]	K09180 Brite Hierarchies	K09191 Unclassified: metabolism	K99980 Enzymes with EC numbers			Glyco_10	0	212210000
B1.1_TRINITY_DN14252_c0_g1_i1.p1									1018500	4310200	4.23191
B1.1_TRINITY_DN14253_c0_g1_i2.p1	K08818	CDC2L; cell division cycle 2-like [EC:2.7.11.22]	K09180 Brite Hierarchies	K09181 Protein families: metabolism	K01001 Protein kinases [BR:ko01001]			STKc_CDC2L1	4754700	0	0
B1.1_TRINITY_DN14260_c0_g1_i1.p1	K09522	DNAJC2; DnaJ homolog subfamily C member 2	K09180 Brite Hierarchies	K09182 Protein families: genetic information processing	K03110 Chaperones and folding catalysts [BR:ko03110]				5764700	3278800	0.568772
B1.1_TRINITY_DN14273_c0_g2_i1.p1	K12826	SF3A2, SAP62; splicing factor 3A subunit 2	K09120 Genetic Information Processing	K09121 Transcription	K03040 Spliceosome [PATH:ko03040]			PRP11	19997900	0	0
B1.1_TRINITY_DN14285_c0_g1_i1.p1	K10798	PARP2_3_4; poly [ADP-ribose] polymerase 2/3/4 [EC:2.4.2.30]	K09120 Genetic Information Processing	K09124 Replication and repair	K03410 Base excision repair [PATH:ko03410]			VIT	1212100	0	0
B1.1_TRINITY_DN143_c0_g1_i6.p1	K03010	RPB2, POLR2B; DNA-directed RNA polymerase II subunit RPB2 [EC:2.7.7.6]	K09120 Genetic Information Processing	K09121 Transcription	K03020 RNA polymerase [PATH:ko03020]			RNA_pol_Rpb2_1	14765500	0	0
B1.1_TRINITY_DN143_c0_g1_i9.p1	K03010	RPB2, POLR2B; DNA-directed RNA polymerase II subunit RPB2 [EC:2.7.7.6]	K09120 Genetic Information Processing	K09121 Transcription	K03020 RNA polymerase [PATH:ko03020]			RNA_pol_Rpb2_1	7585000	0	0
B1.1_TRINITY_DN143_c7_g1_i1.p1	K21631	GTI1, PAC2, WOR1; Gti1/Pac2 family transcription factor	K09180 Brite Hierarchies	K09182 Protein families: genetic information processing	K03000 Transcription factors [BR:ko03000]				5914600	0	0
B1.1_TRINITY_DN1431_c0_g1_i8.p1	K01754	E4.3.1.19, ilvA, tdcB; threonine dehydratase [EC:4.3.1.19]	K09100 Metabolism	K09105 Amino acid metabolism	K00260 Glycine, serine and threonine metabolism [PATH:ko00260]			PRK09224	2.0728e+09	450670000	0.217421
B1.1_TRINITY_DN14317_c1_g1_i5.p1	K21751	DR1, NC2-beta; down-regulator of transcription 1	K09180 Brite Hierarchies	K09182 Protein families: genetic information processing	K03021 Transcription machinery [BR:ko03021]			COG5150	0	7589300
B1.1_TRINITY_DN14322_c0_g1_i1.p1									4657400	0	0
B1.1_TRINITY_DN14336_c0_g1_i2.p1	K10356	MYO1; myosin I	K09160 Human Diseases	K09171 Infectious disease: bacterial	K05130 Pathogenic Escherichia coli infection [PATH:ko05130]			MYSc_Myo1	8278900	4285500	0.517641
B1.1_TRINITY_DN14338_c1_g1_i1.p1	K14863	WDR12, YTM1; ribosome biogenesis protein	K09180 Brite Hierarchies	K09182 Protein families: genetic information processing	K03009 Ribosome biogenesis [BR:ko03009]			WD40	8914900	0	0
B1.1_TRINITY_DN1434_c1_g1_i1.p1									283620	0	0
B1.1_TRINITY_DN1434_c3_g1_i1.p1						CBM_10		Glyco_hydro_48	9295900	76100300	8.18644
B1.1_TRINITY_DN14344_c1_g1_i2.p1	K01728	pel; pectate lyase [EC:4.2.2.2]	K09100 Metabolism	K09101 Carbohydrate metabolism	K00040 Pentose and glucuronate interconversions [PATH:ko00040]		PL1_9	Amb_all	0	449454000
B1.1_TRINITY_DN14350_c1_g2_i1.p1	K17429	MRPL48; large subunit ribosomal protein L48	K09180 Brite Hierarchies	K09182 Protein families: genetic information processing	K03011 Ribosome [BR:ko03011]				0	4881900
B1.1_TRINITY_DN14357_c0_g2_i1.p1									7536900	0	0
B1.1_TRINITY_DN14370_c0_g1_i1.p1	K01179	E3.2.1.4; endoglucanase [EC:3.2.1.4]	K09100 Metabolism	K09101 Carbohydrate metabolism	K00500 Starch and sucrose metabolism [PATH:ko00500]	CBM_10		Glyco_hydro_9	0	56316000
B1.1_TRINITY_DN14372_c0_g4_i1.p1	K05665	ABCC1; ATP-binding cassette, subfamily C (CFTR/MRP), member 1 [EC:7.6.2.3]	K09130 Environmental Information Processing	K09131 Membrane transport	K02010 ABC transporters [PATH:ko02010]			PLN03130	3042100	0	0
B1.1_TRINITY_DN14373_c0_g1_i3.p1								Mmp37	10265700	0	0
B1.1_TRINITY_DN14383_c2_g1_i1.p1								DUF3533	1039590000	9126300	0.00877875
B1.1_TRINITY_DN14390_c0_g2_i1.p1									134282000	115380000	0.859237
B1.1_TRINITY_DN1440_c0_g1_i1.p1	K05765	CFL; cofilin	K09140 Cellular Processes	K09142 Cell motility	K04810 Regulation of actin cytoskeleton [PATH:ko04810]			ADF_cofilin_like	170819000	252282000	1.4769
B1.1_TRINITY_DN14405_c1_g1_i2.p1	K21437	ANKRD13; ankyrin repeat domain-containing protein 13	K09180 Brite Hierarchies	K09182 Protein families: genetic information processing	K04131 Membrane trafficking [BR:ko04131]				1574200	0	0
B1.1_TRINITY_DN14405_c5_g1_i1.p1									2309600	0	0
B1.1_TRINITY_DN14415_c1_g1_i2.p1	K00697	otsA; trehalose 6-phosphate synthase [EC:2.4.1.15 2.4.1.347]	K09100 Metabolism	K09101 Carbohydrate metabolism	K00500 Starch and sucrose metabolism [PATH:ko00500]			Glyco_transf_20	4766600	0	0
B1.1_TRINITY_DN1443_c0_g1_i2.p1									2388900	0	0
B1.1_TRINITY_DN14430_c0_g1_i1.p1									5313100	0	0
B1.1_TRINITY_DN14440_c0_g1_i3.p1								RRM_SF	43452000	0	0
B1.1_TRINITY_DN14466_c0_g1_i2.p1	K04497	GRO, TLE; groucho	K09130 Environmental Information Processing	K09132 Signal transduction	K04013 MAPK signaling pathway - fly [PATH:ko04013]			WD40	16253900	0	0
B1.1_TRINITY_DN14480_c0_g1_i1.p1	K00981	E2.7.7.41, CDS1, CDS2, cdsA; phosphatidate cytidylyltransferase [EC:2.7.7.41]	K09100 Metabolism	K09103 Lipid metabolism	K00564 Glycerophospholipid metabolism [PATH:ko00564]			PLN02594	27918000	0	0
B1.1_TRINITY_DN14481_c0_g2_i1.p1									547200000	7782600	0.0142226
B1.1_TRINITY_DN14488_c1_g1_i1.p1									0	5143100
B1.1_TRINITY_DN14490_c0_g1_i1.p1	K14797	ENP1, BYSL; essential nuclear protein 1	K09180 Brite Hierarchies	K09182 Protein families: genetic information processing	K03009 Ribosome biogenesis [BR:ko03009]			Bystin	5074100	0	0
B1.1_TRINITY_DN14496_c5_g1_i1.p1									61454000	19511000	0.31749
B1.1_TRINITY_DN14506_c1_g1_i1.p1							CBM35	CBM35_mannanase-like	0	83138000
B1.1_TRINITY_DN14506_c1_g1_i2.p1							CBM35	CBM35_mannanase-like	0	4271100
B1.1_TRINITY_DN14506_c1_g1_i3.p1							CBM35	CBM35_mannanase-like	0	245134300
B1.1_TRINITY_DN14518_c0_g1_i2.p1									8769500	0	0
B1.1_TRINITY_DN1452_c0_g1_i1.p1									77442000	508270000	6.56323
B1.1_TRINITY_DN14543_c5_g1_i1.p1									3726900	9348800	2.50847
B1.1_TRINITY_DN1458_c0_g2_i1.p1									4118500	0	0
B1.1_TRINITY_DN1459_c0_g1_i1.p1	K01489	cdd, CDA; cytidine deaminase [EC:3.5.4.5]	K09100 Metabolism	K09104 Nucleotide metabolism	K00240 Pyrimidine metabolism [PATH:ko00240]			Cdd	2464300	148921000	60.4314
B1.1_TRINITY_DN1459_c2_g1_i2.p1	K19825	DBR; 2-alkenal reductase (NADP+) [EC:1.3.1.102]	K09180 Brite Hierarchies	K09191 Unclassified: metabolism	K99980 Enzymes with EC numbers			PGDH	6.309e+09	2.7809e+09	0.440783
B1.1_TRINITY_DN14591_c1_g1_i2.p1									2635300	0	0
B1.1_TRINITY_DN1460_c0_g1_i1.p1									698220	0	0
B1.1_TRINITY_DN14616_c0_g1_i3.p1								SH3_OSTF1	60381000	79971000	1.32444
B1.1_TRINITY_DN14618_c2_g1_i1.p1	K00131	gapN; glyceraldehyde-3-phosphate dehydrogenase (NADP+) [EC:1.2.1.9]	K09100 Metabolism	K09101 Carbohydrate metabolism	K00010 Glycolysis / Gluconeogenesis [PATH:ko00010]			ALDH_F11_NP-GAPDH	11504300	1768200	0.153699
B1.1_TRINITY_DN14632_c0_g1_i2.p1	K01915	glnA, GLUL; glutamine synthetase [EC:6.3.1.2]	K09100 Metabolism	K09101 Carbohydrate metabolism	K00630 Glyoxylate and dicarboxylate metabolism [PATH:ko00630]			GlnA3	976850000	83748000	0.0857327
B1.1_TRINITY_DN14632_c0_g2_i1.p1	K01915	glnA, GLUL; glutamine synthetase [EC:6.3.1.2]	K09100 Metabolism	K09101 Carbohydrate metabolism	K00630 Glyoxylate and dicarboxylate metabolism [PATH:ko00630]			GlnA3	2.7398e+09	206242000	0.0752763
B1.1_TRINITY_DN14634_c2_g1_i1.p1									2911500	0	0
B1.1_TRINITY_DN14645_c0_g1_i2.p1								CotH	14064500	26406700	1.87754
B1.1_TRINITY_DN14645_c0_g2_i1.p1								CotH	9066000	35721000	3.94011
B1.1_TRINITY_DN14649_c0_g1_i1.p1	K07374	TUBA; tubulin alpha	K09140 Cellular Processes	K09141 Transport and catabolism	K04145 Phagosome [PATH:ko04145]			PTZ00335	6.4574e+09	724240000	0.112157
B1.1_TRINITY_DN14653_c2_g1_i1.p1								RanBD_NUP50	91053000	0	0
B1.1_TRINITY_DN14664_c1_g1_i1.p1	K22539	PLY; pectate lyase [EC:4.2.2.2]	K09100 Metabolism	K09101 Carbohydrate metabolism	K00040 Pentose and glucuronate interconversions [PATH:ko00040]		PL3_2	Pectate_lyase	0	51166000
B1.1_TRINITY_DN14679_c0_g3_i1.p1	K13181	DDX27, DRS1; ATP-dependent RNA helicase DDX27 [EC:3.6.4.13]	K09180 Brite Hierarchies	K09182 Protein families: genetic information processing	K03041 Spliceosome [BR:ko03041]			SF2_C_DEAD	2963500	0	0
B1.1_TRINITY_DN1469_c0_g1_i1.p1									0	1665200
B1.1_TRINITY_DN14692_c0_g1_i6.p1	K10421	CLIP1, RSN; CAP-Gly domain-containing linker protein 1	K09130 Environmental Information Processing	K09132 Signal transduction	K04150 mTOR signaling pathway [PATH:ko04150]				302620000	29573600	0.0977252
B1.1_TRINITY_DN14693_c0_g1_i4.p1	K02957	RP-S15Ae, RPS15A; small subunit ribosomal protein S15Ae	K09120 Genetic Information Processing	K09122 Translation	K03010 Ribosome [PATH:ko03010]			PTZ00158	1488600000	27896000	0.0187398
B1.1_TRINITY_DN147_c0_g1_i2.p1	K07827	KRAS, KRAS2; GTPase KRas	K09130 Environmental Information Processing	K09132 Signal transduction	K04010 MAPK signaling pathway [PATH:ko04010]			Ras2	144576000	0	0
B1.1_TRINITY_DN1470_c4_g1_i2.p1									27131000	0	0
B1.1_TRINITY_DN14703_c2_g1_i1.p1									3108800	0	0
B1.1_TRINITY_DN14738_c0_g1_i6.p1	K01179	E3.2.1.4; endoglucanase [EC:3.2.1.4]	K09100 Metabolism	K09101 Carbohydrate metabolism	K00500 Starch and sucrose metabolism [PATH:ko00500]		GH9	Glyco_hydro_9	0	872853000
B1.1_TRINITY_DN14748_c0_g1_i2.p1									5580300	14799100	2.65203
B1.1_TRINITY_DN1478_c7_g1_i1.p1	K16794	PAFAH1B1, LIS1; platelet-activating factor acetylhydrolase IB subunit alpha	K09100 Metabolism	K09103 Lipid metabolism	K00565 Ether lipid metabolism [PATH:ko00565]			WD40	6623600	0	0
B1.1_TRINITY_DN14783_c0_g1_i3.p1									4983900	0	0
B1.1_TRINITY_DN14794_c2_g1_i1.p1									3024400	0	0
B1.1_TRINITY_DN14795_c0_g1_i3.p1	K08176	PHO84; MFS transporter, PHS family, inorganic phosphate transporter	K09180 Brite Hierarchies	K09183 Protein families: signaling and cellular processes	K02000 Transporters [BR:ko02000]			2A0109	142076000	1584100	0.0111497
B1.1_TRINITY_DN14798_c0_g1_i2.p1	K14006	SEC23; protein transport protein SEC23	K09120 Genetic Information Processing	K09123 Folding, sorting and degradation	K04141 Protein processing in endoplasmic reticulum [PATH:ko04141]			PLN00162	14461900	0	0
B1.1_TRINITY_DN14802_c8_g1_i1.p1									0	6964100
B1.1_TRINITY_DN14816_c1_g1_i1.p1								CE4_ClCDA_like	0	109855000
B1.1_TRINITY_DN14857_c0_g2_i2.p1	K10080	LMAN1, ERGIC53; lectin, mannose-binding 1	K09120 Genetic Information Processing	K09123 Folding, sorting and degradation	K04141 Protein processing in endoplasmic reticulum [PATH:ko04141]			lectin_ERGIC-53_ERGL	35251000	0	0
B1.1_TRINITY_DN1488_c1_g1_i1.p1									101014000	0	0
B1.1_TRINITY_DN1488_c1_g2_i1.p1									242740000	152082000	0.626522
B1.1_TRINITY_DN14880_c0_g1_i2.p1	K13886	CORO1B_1C_6; coronin-1B/1C/6	K09180 Brite Hierarchies	K09183 Protein families: signaling and cellular processes	K04812 Cytoskeleton proteins [BR:ko04812]			WD40_4	8114500	32310000	3.98176
B1.1_TRINITY_DN14884_c0_g1_i2.p1	K15040	VDAC2; voltage-dependent anion channel protein 2	K09130 Environmental Information Processing	K09132 Signal transduction	K04020 Calcium signaling pathway [PATH:ko04020]			Porin3_VDAC	1.97677e+09	29296600	0.0148204
B1.1_TRINITY_DN14886_c0_g1_i4.p1	K03439	trmB, METTL1, TRM8; tRNA (guanine-N7-)-methyltransferase [EC:2.1.1.33]	K09180 Brite Hierarchies	K09182 Protein families: genetic information processing	K03016 Transfer RNA biogenesis [BR:ko03016]			Methyltransf_4	16103000	6234200	0.387145
B1.1_TRINITY_DN1489_c0_g1_i1.p1	K12755	MYL9; myosin regulatory light chain 9	K09130 Environmental Information Processing	K09132 Signal transduction	K04024 cAMP signaling pathway [PATH:ko04024]			FRQ1	49172000	6190700	0.125899
B1.1_TRINITY_DN14899_c0_g1_i2.p1									0	1586800
B1.1_TRINITY_DN1490_c1_g2_i1.p1								UPF0121	9710100	0	0
B1.1_TRINITY_DN1490_c2_g1_i1.p1	K01336	E3.4.21.48; cerevisin [EC:3.4.21.48]	K09140 Cellular Processes	K09141 Transport and catabolism	K04138 Autophagy - yeast [PATH:ko04138]			Peptidases_S8_PCSK9_ProteinaseK_like	11898400	138237000	11.6181
B1.1_TRINITY_DN1490_c4_g1_i2.p1						CBM_10			0	25001000
B1.1_TRINITY_DN14902_c1_g1_i2.p1									4005000	0	0
B1.1_TRINITY_DN14914_c0_g1_i12.p1	K17883	mtr; mycothione reductase [EC:1.8.1.15]	K09180 Brite Hierarchies	K09191 Unclassified: metabolism	K99980 Enzymes with EC numbers			PRK06292	491420000	45374000	0.0923324
B1.1_TRINITY_DN14916_c0_g1_i2.p1									346730	0	0
B1.1_TRINITY_DN1495_c0_g1_i1.p1	K03517	nadA; quinolinate synthase [EC:2.5.1.72]	K09100 Metabolism	K09108 Metabolism of cofactors and vitamins	K00760 Nicotinate and nicotinamide metabolism [PATH:ko00760]			PLN02673	683800000	335599000	0.490785
B1.1_TRINITY_DN14955_c0_g1_i1.p1									11630400	0	0
B1.1_TRINITY_DN14955_c0_g3_i1.p1									57138500	2279300	0.0398908
B1.1_TRINITY_DN14965_c0_g1_i1.p1	K01641	HMGCS; hydroxymethylglutaryl-CoA synthase [EC:2.3.3.10]	K09100 Metabolism	K09101 Carbohydrate metabolism	K00650 Butanoate metabolism [PATH:ko00650]			PLN02577	149405000	0	0
B1.1_TRINITY_DN1497_c0_g1_i3.p1	K00728	POMT, pmt; dolichyl-phosphate-mannose-protein mannosyltransferase [EC:2.4.1.109]	K09100 Metabolism	K09107 Glycan biosynthesis and metabolism	K00515 Mannose type O-glycan biosynthesis [PATH:ko00515]			PMT1	118412000	0	0
B1.1_TRINITY_DN1499_c0_g1_i2.p1									0	127730000
B1.1_TRINITY_DN15_c0_g1_i1.p1							CE4	CE4_ClCDA_like	516610000	29403600	0.0569164
B1.1_TRINITY_DN15_c0_g2_i11.p1							CE4	CE4_ClCDA_like	683000000	2419500	0.00354246
B1.1_TRINITY_DN15_c0_g2_i16.p1									1402500	21764000	15.518
B1.1_TRINITY_DN15_c0_g2_i2.p1									301590000	1093656000	3.6263
B1.1_TRINITY_DN15_c0_g2_i8.p1									107272000	87016000	0.811172
B1.1_TRINITY_DN15_c2_g1_i1.p1								Chitin_bind_1	29200200	41331000	1.41544
B1.1_TRINITY_DN150_c0_g1_i1.p1									0	14481200
B1.1_TRINITY_DN1500_c1_g2_i1.p1	K11262	ACACA; acetyl-CoA carboxylase / biotin carboxylase 1 [EC:6.4.1.2 6.3.4.14 2.1.3.15]	K09100 Metabolism	K09101 Carbohydrate metabolism	K00620 Pyruvate metabolism [PATH:ko00620]			Carboxyl_trans	178392000	3736600	0.020946
B1.1_TRINITY_DN15022_c0_g1_i1.p1									11361800	0	0
B1.1_TRINITY_DN15023_c0_g1_i3.p1	K00211	TYR1; prephenate dehydrogenase (NADP+) [EC:1.3.1.13]	K09100 Metabolism	K09105 Amino acid metabolism	K00400 Phenylalanine, tyrosine and tryptophan biosynthesis [PATH:ko00400]				11274100	0	0
B1.1_TRINITY_DN15024_c0_g1_i10.p1	K19668	CBH2, cbhA; cellulose 1,4-beta-cellobiosidase [EC:3.2.1.91]	K09100 Metabolism	K09101 Carbohydrate metabolism	K00500 Starch and sucrose metabolism [PATH:ko00500]		GH6	Glyco_hydro_6	0	22567000
B1.1_TRINITY_DN15024_c0_g1_i12.p1	K19668	CBH2, cbhA; cellulose 1,4-beta-cellobiosidase [EC:3.2.1.91]	K09100 Metabolism	K09101 Carbohydrate metabolism	K00500 Starch and sucrose metabolism [PATH:ko00500]		GH6	Glyco_hydro_6	121509000	21539600000	177.268
B1.1_TRINITY_DN15024_c0_g1_i17.p1	K19668	CBH2, cbhA; cellulose 1,4-beta-cellobiosidase [EC:3.2.1.91]	K09100 Metabolism	K09101 Carbohydrate metabolism	K00500 Starch and sucrose metabolism [PATH:ko00500]		GH6	Glyco_hydro_6	0	718444000
B1.1_TRINITY_DN15024_c0_g1_i19.p1	K19668	CBH2, cbhA; cellulose 1,4-beta-cellobiosidase [EC:3.2.1.91]	K09100 Metabolism	K09101 Carbohydrate metabolism	K00500 Starch and sucrose metabolism [PATH:ko00500]		GH6	Glyco_hydro_6	0	304765900
B1.1_TRINITY_DN15024_c0_g1_i5.p1	K19668	CBH2, cbhA; cellulose 1,4-beta-cellobiosidase [EC:3.2.1.91]	K09100 Metabolism	K09101 Carbohydrate metabolism	K00500 Starch and sucrose metabolism [PATH:ko00500]		GH6	Glyco_hydro_6	0	1191570000
B1.1_TRINITY_DN15028_c0_g1_i2.p1									0	8351200
B1.1_TRINITY_DN1506_c0_g1_i3.p1	K10258	TER, TSC13, CER10; very-long-chain enoyl-CoA reductase [EC:1.3.1.93]	K09100 Metabolism	K09103 Lipid metabolism	K00062 Fatty acid elongation [PATH:ko00062]			PLN02560	67249000	0	0
B1.1_TRINITY_DN15063_c0_g1_i1.p1								RNA_pol_Rpc34	9246000	0	0
B1.1_TRINITY_DN1508_c0_g1_i1.p1	K00606	panB; 3-methyl-2-oxobutanoate hydroxymethyltransferase [EC:2.1.2.11]	K09100 Metabolism	K09108 Metabolism of cofactors and vitamins	K00770 Pantothenate and CoA biosynthesis [PATH:ko00770]			Pantoate_transf	361400000	3950400	0.0109308
B1.1_TRINITY_DN15081_c1_g1_i1.p1									0	1161500
B1.1_TRINITY_DN1509_c0_g2_i2.p1	K01183	E3.2.1.14; chitinase [EC:3.2.1.14]	K09100 Metabolism	K09101 Carbohydrate metabolism	K00520 Amino sugar and nucleotide sugar metabolism [PATH:ko00520]		GH18	GH18_chitinase	719910000	629680000	0.874665
B1.1_TRINITY_DN15092_c0_g3_i1.p1	K01181	E3.2.1.8, xynA; endo-1,4-beta-xylanase [EC:3.2.1.8]	K09180 Brite Hierarchies	K09191 Unclassified: metabolism	K99980 Enzymes with EC numbers			Glyco_hydro_10	0	66631000
B1.1_TRINITY_DN15107_c0_g5_i4.p1	K04532	NAE1, APPBP1; NEDD8-activating enzyme E1 regulatory subunit	K09160 Human Diseases	K09164 Neurodegenerative disease				APPBP1_RUB	2014600	0	0
B1.1_TRINITY_DN15107_c0_g7_i1.p1								CotH	68061000	379020000	5.56883
B1.1_TRINITY_DN15112_c3_g1_i1.p1									0	46685000
B1.1_TRINITY_DN15123_c0_g1_i1.p1	K03115	CSNK2B; casein kinase II subunit beta	K09120 Genetic Information Processing	K09122 Translation	K03008 Ribosome biogenesis in eukaryotes [PATH:ko03008]			CK_II_beta	25115600	0	0
B1.1_TRINITY_DN15129_c0_g1_i5.p1								PTZ00421	94994000	885190000	9.31838
B1.1_TRINITY_DN15131_c1_g1_i1.p1	K00698	CHS1; chitin synthase [EC:2.4.1.16]	K09100 Metabolism	K09101 Carbohydrate metabolism	K00520 Amino sugar and nucleotide sugar metabolism [PATH:ko00520]				44819000	0	0
B1.1_TRINITY_DN15139_c0_g1_i3.p1	K06944	K06944; uncharacterized protein	K09180 Brite Hierarchies	K09194 Poorly characterized	K99997 Function unknown			Rbg1	33145000	0	0
B1.1_TRINITY_DN15139_c2_g1_i1.p1									0	7085400
B1.1_TRINITY_DN1514_c0_g1_i13.p1	K01867	WARS, trpS; tryptophanyl-tRNA synthetase [EC:6.1.1.2]	K09120 Genetic Information Processing	K09122 Translation	K00970 Aminoacyl-tRNA biosynthesis [PATH:ko00970]			PLN02486	980010000	212543600	0.216879
B1.1_TRINITY_DN1514_c0_g2_i1.p1	K15296	NAPA, SNAPA, SEC17; alpha-soluble NSF attachment protein	K09140 Cellular Processes	K09141 Transport and catabolism	K04138 Autophagy - yeast [PATH:ko04138]			SNAP	160982000	5353000	0.0332522
B1.1_TRINITY_DN15162_c0_g1_i10.p1	K14290	XPO1, CRM1; exportin-1	K09120 Genetic Information Processing	K09122 Translation	K03013 Nucleocytoplasmic transport [PATH:ko03013]			CRM1	122637000	0	0
B1.1_TRINITY_DN1518_c4_g2_i1.p1									4900700	0	0
B1.1_TRINITY_DN15182_c0_g1_i1.p1	K15175	CDC73; parafibromin	K09180 Brite Hierarchies	K09182 Protein families: genetic information processing	K03021 Transcription machinery [BR:ko03021]			CDC73_C	6756300	0	0
B1.1_TRINITY_DN15185_c0_g1_i1.p1								HMG-box_NHP6-like	5793500	27342100	4.71944
B1.1_TRINITY_DN1519_c0_g1_i6.p1								STKc_PKC	10685700	0	0
B1.1_TRINITY_DN152_c1_g2_i2.p1	K10976	ERO1LB; ERO1-like protein beta [EC:1.8.4.-]	K09120 Genetic Information Processing	K09123 Folding, sorting and degradation	K04141 Protein processing in endoplasmic reticulum [PATH:ko04141]			ERO1	365850000	0	0
B1.1_TRINITY_DN1520_c3_g1_i1.p1	K22539	PLY; pectate lyase [EC:4.2.2.2]	K09100 Metabolism	K09101 Carbohydrate metabolism	K00040 Pentose and glucuronate interconversions [PATH:ko00040]		PL3_2	Pectate_lyase	141265000	403320000	2.85506
B1.1_TRINITY_DN1521_c0_g1_i3.p1	K07575	MCTS, TMA20; malignant T-cell-amplified sequence	K09180 Brite Hierarchies	K09182 Protein families: genetic information processing	K03019 Messenger RNA biogenesis [BR:ko03019]			PUA_MCTS-1-like	150294000	39192700	0.260774
B1.1_TRINITY_DN15225_c0_g1_i1.p1	K22140	MGM1; dynamin-like GTPase MGM1, mitochondrial	K09180 Brite Hierarchies	K09182 Protein families: genetic information processing	K03029 Mitochondrial biogenesis [BR:ko03029]				54939000	0	0
B1.1_TRINITY_DN1526_c0_g1_i5.p1	K01179	E3.2.1.4; endoglucanase [EC:3.2.1.4]	K09100 Metabolism	K09101 Carbohydrate metabolism	K00500 Starch and sucrose metabolism [PATH:ko00500]	CBM_10			0	116192000
B1.1_TRINITY_DN1527_c0_g3_i2.p1	K08867	WNK, PRKWNK; WNK lysine deficient protein kinase [EC:2.7.11.1]	K09180 Brite Hierarchies	K09181 Protein families: metabolism	K01001 Protein kinases [BR:ko01001]			STKc_WNK	4713800	0	0
B1.1_TRINITY_DN1531_c0_g1_i1.p1								Alpha_adaptinC2	0	2025900
B1.1_TRINITY_DN1535_c3_g1_i1.p1									4059300	7298200	1.7979
B1.1_TRINITY_DN1541_c0_g1_i1.p1	K20520	DBNL, ABP1; drebrin-like protein	K09180 Brite Hierarchies	K09182 Protein families: genetic information processing	K04131 Membrane trafficking [BR:ko04131]			SH3_Cortactin_like	2709400	0	0
B1.1_TRINITY_DN1541_c1_g1_i4.p1									1680100	0	0
B1.1_TRINITY_DN15426_c1_g1_i2.p1	K12854	SNRNP200, BRR2; pre-mRNA-splicing helicase BRR2 [EC:3.6.4.13]	K09120 Genetic Information Processing	K09121 Transcription	K03040 Spliceosome [PATH:ko03040]			Helicase_PWI	23304000	0	0
B1.1_TRINITY_DN1543_c0_g1_i1.p1									0	20972700
B1.1_TRINITY_DN15439_c1_g1_i1.p1	K17255	GDI1_2; Rab GDP dissociation inhibitor	K09180 Brite Hierarchies	K09183 Protein families: signaling and cellular processes	K04147 Exosome [BR:ko04147]			PTZ00363	10292000	10902300	1.0593
B1.1_TRINITY_DN15462_c0_g1_i3.p1								Ank_2	13655300	0	0
B1.1_TRINITY_DN15477_c0_g1_i2.p1	K14296	NUP153; nuclear pore complex protein Nup153	K09120 Genetic Information Processing	K09122 Translation	K03013 Nucleocytoplasmic transport [PATH:ko03013]				4826700	1398900	0.289825
B1.1_TRINITY_DN15533_c0_g2_i1.p1	K17290	HTATIP2; oxidoreductase [EC:1.1.1.-]	K09180 Brite Hierarchies	K09183 Protein families: signaling and cellular processes	K04147 Exosome [BR:ko04147]			CC3_like_SDR_a	317070000	35812000	0.112947
B1.1_TRINITY_DN15533_c2_g1_i1.p1								SMC_prok_B	13049500	3800400	0.29123
B1.1_TRINITY_DN1555_c4_g1_i3.p1	K00817	hisC; histidinol-phosphate aminotransferase [EC:2.6.1.9]	K09100 Metabolism	K09105 Amino acid metabolism	K00340 Histidine metabolism [PATH:ko00340]			PLN03026	343250000	244739000	0.713005
B1.1_TRINITY_DN15577_c0_g1_i1.p1	K00750	GYG1, GYG2; glycogenin [EC:2.4.1.186]	K09100 Metabolism	K09101 Carbohydrate metabolism	K00500 Starch and sucrose metabolism [PATH:ko00500]			GT8_Glycogenin	374570000	0	0
B1.1_TRINITY_DN15583_c0_g1_i1.p1	K01322	PREP; prolyl oligopeptidase [EC:3.4.21.26]	K09150 Organismal Systems	K09152 Endocrine system				Peptidase_S9_N	0	24967000
B1.1_TRINITY_DN1563_c1_g1_i6.p1	K14416	HBS1; elongation factor 1 alpha-like protein	K09120 Genetic Information Processing	K09122 Translation	K03015 mRNA surveillance pathway [PATH:ko03015]			EF1_alpha	1658160	0	0
B1.1_TRINITY_DN15650_c0_g1_i3.p1	K07466	RFA1, RPA1, rpa; replication factor A1	K09120 Genetic Information Processing	K09124 Replication and repair	K03030 DNA replication [PATH:ko03030]			Rep_fac-A_C	30055100	1240400	0.0412709
B1.1_TRINITY_DN15651_c1_g1_i4.p1	K00948	PRPS, prsA; ribose-phosphate pyrophosphokinase [EC:2.7.6.1]	K09100 Metabolism	K09101 Carbohydrate metabolism	K00030 Pentose phosphate pathway [PATH:ko00030]			PrsA	6888900	0	0
B1.1_TRINITY_DN15656_c0_g2_i2.p1	K13093	HTATSF1; HIV Tat-specific factor 1	K09180 Brite Hierarchies	K09182 Protein families: genetic information processing	K03041 Spliceosome [BR:ko03041]			RRM2_TatSF1_like	2264100	0	0
B1.1_TRINITY_DN1566_c0_g3_i1.p1	K14521	NAT10, KRE33; N-acetyltransferase 10 [EC:2.3.1.-]	K09120 Genetic Information Processing	K09122 Translation	K03008 Ribosome biogenesis in eukaryotes [PATH:ko03008]			tRNA_bind_2	6551800	0	0
B1.1_TRINITY_DN1567_c0_g1_i5.p1	K00826	E2.6.1.42, ilvE; branched-chain amino acid aminotransferase [EC:2.6.1.42]	K09100 Metabolism	K09105 Amino acid metabolism	K00270 Cysteine and methionine metabolism [PATH:ko00270]			PRK13357	706740000	474870000	0.671916
B1.1_TRINITY_DN1567_c1_g2_i1.p1									22155000	0	0
B1.1_TRINITY_DN15677_c0_g3_i5.p1								iPGM_like	67687000	0	0
B1.1_TRINITY_DN15697_c0_g1_i1.p1	K12392	AP1B1; AP-1 complex subunit beta-1	K09140 Cellular Processes	K09141 Transport and catabolism	K04142 Lysosome [PATH:ko04142]			Alpha_adaptinC2	4368800	0	0
B1.1_TRINITY_DN157_c0_g1_i2.p1									2059960	8795000	4.2695
B1.1_TRINITY_DN15709_c0_g1_i3.p1	K12869	CRN, CRNKL1, CLF1, SYF3; crooked neck	K09120 Genetic Information Processing	K09121 Transcription	K03040 Spliceosome [PATH:ko03040]				14344400	0	0
B1.1_TRINITY_DN15721_c0_g1_i1.p1									0	1457100
B1.1_TRINITY_DN15726_c0_g1_i1.p1	K11824	AP2A; AP-2 complex subunit alpha	K09140 Cellular Processes	K09141 Transport and catabolism	K04144 Endocytosis [PATH:ko04144]			Alpha_adaptin_C	10348400	0	0
B1.1_TRINITY_DN1574_c0_g1_i1.p1	K01893	NARS, asnS; asparaginyl-tRNA synthetase [EC:6.1.1.22]	K09120 Genetic Information Processing	K09122 Translation	K00970 Aminoacyl-tRNA biosynthesis [PATH:ko00970]			AsnS	1277280000	4116700	0.00322302
B1.1_TRINITY_DN15766_c0_g1_i2.p1									10374400	0	0
B1.1_TRINITY_DN15769_c0_g1_i1.p1	K05767	IQGAP2_3; Ras GTPase-activating-like protein IQGAP2/3	K09140 Cellular Processes	K09142 Cell motility	K04810 Regulation of actin cytoskeleton [PATH:ko04810]			CH_IQGAP	54176000	0	0
B1.1_TRINITY_DN1579_c1_g3_i2.p1	K00364	guaC, GMPR; GMP reductase [EC:1.7.1.7]	K09100 Metabolism	K09104 Nucleotide metabolism	K00230 Purine metabolism [PATH:ko00230]			PRK05096	0	2207000
B1.1_TRINITY_DN15791_c0_g1_i1.p1									2205400	0	0
B1.1_TRINITY_DN15793_c0_g1_i2.p1	K05350	bglB; beta-glucosidase [EC:3.2.1.21]	K09100 Metabolism	K09101 Carbohydrate metabolism	K00500 Starch and sucrose metabolism [PATH:ko00500]			BGL	0	9469800
B1.1_TRINITY_DN15793_c1_g1_i2.p1	K01188	E3.2.1.21; beta-glucosidase [EC:3.2.1.21]	K09100 Metabolism	K09101 Carbohydrate metabolism	K00500 Starch and sucrose metabolism [PATH:ko00500]			Glyco_hydro_1	225439000	1163720000	5.16202
B1.1_TRINITY_DN158_c0_g1_i13.p1	K17498	SPN1, IWS1; transcription factor SPN1	K09180 Brite Hierarchies	K09182 Protein families: genetic information processing	K03021 Transcription machinery [BR:ko03021]			COG5139	17930700	0	0
B1.1_TRINITY_DN1580_c0_g2_i9.p1	K12893	SRSF4_5_6, SFRS4_5_6; serine/arginine-rich splicing factor 4/5/6	K09120 Genetic Information Processing	K09121 Transcription	K03040 Spliceosome [PATH:ko03040]			RRM2_SRSF1_4_like	430520000	10395500	0.0241464
B1.1_TRINITY_DN15840_c0_g1_i1.p1									0	4797700
B1.1_TRINITY_DN15849_c1_g1_i2.p1									0	10833000
B1.1_TRINITY_DN15867_c0_g1_i1.p1									1611400	1470500	0.912561
B1.1_TRINITY_DN1588_c0_g1_i3.p1	K06666	TUP1; general transcriptional corepressor TUP1	K09130 Environmental Information Processing	K09132 Signal transduction	K04011 MAPK signaling pathway - yeast [PATH:ko04011]			WD40	17997000	4336600	0.240962
B1.1_TRINITY_DN1588_c2_g1_i1.p1								Ank_2	0	18845000
B1.1_TRINITY_DN15897_c0_g1_i2.p1	K00700	GBE1, glgB; 1,4-alpha-glucan branching enzyme [EC:2.4.1.18]	K09100 Metabolism	K09101 Carbohydrate metabolism	K00500 Starch and sucrose metabolism [PATH:ko00500]			PLN02447	1378750000	21850800	0.0158483
B1.1_TRINITY_DN159_c0_g1_i1.p1	K11259	ILVBL; acetolactate synthase-like protein [EC:2.2.1.-]	K09180 Brite Hierarchies	K09191 Unclassified: metabolism	K99980 Enzymes with EC numbers			IlvB	212080000	0	0
B1.1_TRINITY_DN159_c0_g1_i9.p1	K11259	ILVBL; acetolactate synthase-like protein [EC:2.2.1.-]	K09180 Brite Hierarchies	K09191 Unclassified: metabolism	K99980 Enzymes with EC numbers			TPP_PYR_POX_like	18114300	0	0
B1.1_TRINITY_DN1591_c0_g1_i1.p1	K20463	OSBPL3_6_7, ORP3_6_7; oxysterol-binding protein-related protein 3/6/7	K09180 Brite Hierarchies	K09182 Protein families: genetic information processing	K04131 Membrane trafficking [BR:ko04131]			Oxysterol_BP	8226100	0	0
B1.1_TRINITY_DN1592_c1_g1_i3.p1									0	4394800
B1.1_TRINITY_DN1593_c0_g2_i5.p1									19213000	34969000	1.82007
B1.1_TRINITY_DN15930_c2_g1_i1.p1									458790000	1317530000	2.87175
B1.1_TRINITY_DN15939_c0_g1_i1.p1									45804000	0	0
B1.1_TRINITY_DN15939_c0_g1_i3.p1	K20040	HIP1R, SLA2; huntingtin-interacting protein 1-related protein	K09180 Brite Hierarchies	K09182 Protein families: genetic information processing	K04131 Membrane trafficking [BR:ko04131]			ANTH	10737800	0	0
B1.1_TRINITY_DN1594_c1_g1_i2.p1	K18443	GBF1; golgi-specific brefeldin A-resistance guanine nucleotide exchange factor 1	K09140 Cellular Processes	K09141 Transport and catabolism	K04144 Endocytosis [PATH:ko04144]			Sec7	4694200	0	0
B1.1_TRINITY_DN1595_c0_g1_i6.p1	K12462	ARHGDI, RHOGDI; Rho GDP-dissociation inhibitor	K09150 Organismal Systems	K09155 Excretory system				Rho_GDI	215880000	882210000	4.08658
B1.1_TRINITY_DN1596_c0_g2_i2.p1	K16575	ACTR1, ARP1; centractin	K09160 Human Diseases	K09171 Infectious disease: bacterial	K05132 Salmonella infection [PATH:ko05132]			ACTIN	35603000	0	0
B1.1_TRINITY_DN1599_c0_g1_i2.p2								HSF_DNA-bind	242847000	0	0
B1.1_TRINITY_DN16_c0_g1_i2.p1								STKc_CAMK	2505000	0	0
B1.1_TRINITY_DN160_c0_g1_i1.p1									0	1505000
B1.1_TRINITY_DN1600_c0_g2_i1.p1	K04499	RUVBL1, RVB1, INO80H; RuvB-like protein 1 [EC:3.6.4.12]	K09130 Environmental Information Processing	K09132 Signal transduction	K04310 Wnt signaling pathway [PATH:ko04310]			TIP49	193772000	6668700	0.0344152
B1.1_TRINITY_DN1600_c1_g1_i1.p1									270790000	0	0
B1.1_TRINITY_DN16003_c0_g2_i6.p1	K22073	IBA57; transferase CAF17, mitochondrial [EC:2.1.-.-]	K09180 Brite Hierarchies	K09182 Protein families: genetic information processing	K03029 Mitochondrial biogenesis [BR:ko03029]				22130700	0	0
B1.1_TRINITY_DN16008_c0_g1_i1.p1									0	9928000
B1.1_TRINITY_DN16024_c0_g1_i1.p1									7448800	0	0
B1.1_TRINITY_DN1604_c0_g1_i4.p1	K12838	PUF60; poly(U)-binding-splicing factor PUF60	K09120 Genetic Information Processing	K09121 Transcription	K03040 Spliceosome [PATH:ko03040]			RRM1_PUF60	11733500	2844700	0.242443
B1.1_TRINITY_DN1605_c0_g1_i2.p1	K03249	EIF3F; translation initiation factor 3 subunit F	K09180 Brite Hierarchies	K09182 Protein families: genetic information processing	K03012 Translation factors [BR:ko03012]			MPN_eIF3f	285580000	0	0
B1.1_TRINITY_DN16051_c0_g1_i1.p1									26411000	11304000	0.428003
B1.1_TRINITY_DN16067_c1_g1_i1.p1									27116000	0	0
B1.1_TRINITY_DN1607_c0_g1_i4.p1								RRM1_U1A_like	31226000	0	0
B1.1_TRINITY_DN16082_c1_g1_i1.p1	K02150	ATPeV1E, ATP6E; V-type H+-transporting ATPase subunit E	K09100 Metabolism	K09102 Energy metabolism	K00190 Oxidative phosphorylation [PATH:ko00190]			vATP-synt_E	3.5133e+09	1256120000	0.357533
B1.1_TRINITY_DN1610_c0_g1_i5.p1	K00661	maa; maltose O-acetyltransferase [EC:2.3.1.79]	K09180 Brite Hierarchies	K09191 Unclassified: metabolism	K99980 Enzymes with EC numbers			LbH_MAT_GAT	2416400	52650000	21.7886
B1.1_TRINITY_DN1610_c1_g1_i1.p1	K00940	ndk, NME; nucleoside-diphosphate kinase [EC:2.7.4.6]	K09100 Metabolism	K09104 Nucleotide metabolism	K00230 Purine metabolism [PATH:ko00230]			PTZ00093	1211590000	998180000	0.82386
B1.1_TRINITY_DN16109_c1_g1_i1.p1	K10419	DYNLRB, DNCL2; dynein light chain roadblock-type	K09160 Human Diseases	K09171 Infectious disease: bacterial	K05132 Salmonella infection [PATH:ko05132]			Robl_LC7	4921400	1012800	0.205795
B1.1_TRINITY_DN16117_c0_g1_i1.p1								E_set_AMPKbeta_like_N	9957800	17461000	1.7535
B1.1_TRINITY_DN16125_c5_g1_i1.p1	K01181	E3.2.1.8, xynA; endo-1,4-beta-xylanase [EC:3.2.1.8]	K09180 Brite Hierarchies	K09191 Unclassified: metabolism	K99980 Enzymes with EC numbers		GH10	Glyco_hydro_10	0	4302600
B1.1_TRINITY_DN16131_c0_g1_i1.p1									1896700	0	0
B1.1_TRINITY_DN1616_c0_g1_i2.p1	K02155	ATPeV0C, ATP6L; V-type H+-transporting ATPase 16kDa proteolipid subunit	K09100 Metabolism	K09102 Energy metabolism	K00190 Oxidative phosphorylation [PATH:ko00190]			V_ATP_synt_C	146830000	0	0
B1.1_TRINITY_DN1616_c1_g1_i2.p1	K07897	RAB7A; Ras-related protein Rab-7A	K09140 Cellular Processes	K09141 Transport and catabolism	K04144 Endocytosis [PATH:ko04144]			Rab7	132103000	0	0
B1.1_TRINITY_DN1616_c2_g1_i2.p1	K03267	ERF3, GSPT; peptide chain release factor subunit 3	K09120 Genetic Information Processing	K09122 Translation	K03015 mRNA surveillance pathway [PATH:ko03015]			TEF1	268670000	1515700	0.00564149
B1.1_TRINITY_DN1616_c5_g1_i2.p1	K20523	SH3YL1; SH3 domain-containing YSC84-like protein 1	K09180 Brite Hierarchies	K09182 Protein families: genetic information processing	K04131 Membrane trafficking [BR:ko04131]			SYLF_SH3YL1_like	203621000	29578500	0.145263
B1.1_TRINITY_DN16163_c0_g1_i1.p1	K11232	YPD1; osomolarity two-component system, phosphorelay intermediate protein YPD1	K09130 Environmental Information Processing	K09132 Signal transduction	K02020 Two-component system [PATH:ko02020]				11015700	0	0
B1.1_TRINITY_DN16175_c0_g1_i1.p1	K12397	AP3B; AP-3 complex subunit beta	K09140 Cellular Processes	K09141 Transport and catabolism	K04142 Lysosome [PATH:ko04142]				1201880	0	0
B1.1_TRINITY_DN1618_c1_g1_i5.p1	K00147	proA; glutamate-5-semialdehyde dehydrogenase [EC:1.2.1.41]	K09100 Metabolism	K09105 Amino acid metabolism	K00330 Arginine and proline metabolism [PATH:ko00330]			ALDH_F18-19_ProA-GPR	760980000	1772150000	2.32877
B1.1_TRINITY_DN16180_c0_g2_i3.p1	K04069	pflA, pflC, pflE; pyruvate formate lyase activating enzyme [EC:1.97.1.4]	K09180 Brite Hierarchies	K09191 Unclassified: metabolism	K99980 Enzymes with EC numbers			PFLA	782260000	771320000	0.986015
B1.1_TRINITY_DN1619_c1_g1_i1.p1							PL4	RGL4_N	25520000	343400000	13.4561
B1.1_TRINITY_DN162_c1_g4_i1.p1	K06691	RPN13; 26S proteasome regulatory subunit N13	K09120 Genetic Information Processing	K09123 Folding, sorting and degradation	K03050 Proteasome [PATH:ko03050]			PH_Rpn13	167996000	107967000	0.642676
B1.1_TRINITY_DN1620_c0_g1_i3.p1	K05758	ARPC2; actin related protein 2/3 complex, subunit 2	K09140 Cellular Processes	K09141 Transport and catabolism	K04144 Endocytosis [PATH:ko04144]			P34-Arc	212430000	47270000	0.22252
B1.1_TRINITY_DN16205_c0_g2_i1.p1									0	62734200
B1.1_TRINITY_DN1623_c0_g1_i3.p1								SET_LegAS4-like	251552000	0	0
B1.1_TRINITY_DN16240_c0_g1_i2.p1	K12881	THOC4, ALY; THO complex subunit 4	K09120 Genetic Information Processing	K09121 Transcription	K03040 Spliceosome [PATH:ko03040]			RRM_Aly_REF_like	69375200	1661300	0.0239466
B1.1_TRINITY_DN16261_c0_g1_i1.p1								RsmB	0	799130
B1.1_TRINITY_DN1627_c0_g1_i4.p1						CBM_10	fungi_doc+fungi_doc	Glyco_hydro_45	2086100	4885180000	2341.78
B1.1_TRINITY_DN1627_c0_g1_i6.p1							GH45_1	Glyco_hydro_45	0	5680600
B1.1_TRINITY_DN1627_c0_g2_i14.p1						CBM_10	GH45_1	Glyco_hydro_45	0	175620000
B1.1_TRINITY_DN1627_c0_g2_i6.p1						CBM_10	GH45_1	Glyco_hydro_45	3511800	6.05952e+09	1725.47
B1.1_TRINITY_DN1627_c0_g3_i1.p1							GH45	Glyco_hydro_45	0	302142400
B1.1_TRINITY_DN1627_c0_g4_i2.p1							GH45	Glyco_hydro_45	0	1.49735e+09
B1.1_TRINITY_DN1628_c0_g1_i2.p1								M1_APN-Q_like	74187000	29825600	0.402033
B1.1_TRINITY_DN163_c0_g3_i2.p1	K17302	COPB2, SEC27; coatomer subunit beta'	K09180 Brite Hierarchies	K09182 Protein families: genetic information processing	K04131 Membrane trafficking [BR:ko04131]				10185200	0	0
B1.1_TRINITY_DN16327_c0_g1_i1.p1									0	3536800
B1.1_TRINITY_DN16329_c0_g1_i1.p1									2929900	0	0
B1.1_TRINITY_DN16338_c0_g1_i1.p1	K03255	TIF31, CLU1; protein TIF31	K09180 Brite Hierarchies	K09182 Protein families: genetic information processing	K03012 Translation factors [BR:ko03012]			CLU-central	17221200	0	0
B1.1_TRINITY_DN16342_c0_g1_i1.p1	K03240	EIF2B5; translation initiation factor eIF-2B subunit epsilon	K09160 Human Diseases	K09172 Infectious disease: viral				eIF-2B_epsilon_N	69331000	0	0
B1.1_TRINITY_DN16346_c0_g1_i2.p1	K03424	tatD; TatD DNase family protein [EC:3.1.21.-]	K09180 Brite Hierarchies	K09191 Unclassified: metabolism	K99980 Enzymes with EC numbers			TatD_DNase	8119600	0	0
B1.1_TRINITY_DN16380_c2_g1_i1.p1									64048000	79851000	1.24674
B1.1_TRINITY_DN164_c0_g1_i8.p1	K23481	VPS1; vacuolar protein sorting-associated protein 1	K09180 Brite Hierarchies	K09182 Protein families: genetic information processing	K04131 Membrane trafficking [BR:ko04131]			DLP_1	395390000	0	0
B1.1_TRINITY_DN1643_c1_g1_i1.p1									1360770	0	0
B1.1_TRINITY_DN1643_c2_g1_i1.p1									13177200	0	0
B1.1_TRINITY_DN1643_c2_g1_i4.p1									593720000	430532000	0.725143
B1.1_TRINITY_DN1645_c0_g1_i5.p1								CDC50	51446000	0	0
B1.1_TRINITY_DN1646_c0_g1_i1.p2									36750000	79989000	2.17657
B1.1_TRINITY_DN1646_c2_g1_i2.p1	K14454	GOT1; aspartate aminotransferase, cytoplasmic [EC:2.6.1.1]	K09100 Metabolism	K09102 Energy metabolism	K00710 Carbon fixation in photosynthetic organisms [PATH:ko00710]			PLN02397	9881000	53871200	5.452
B1.1_TRINITY_DN1646_c2_g1_i3.p1	K14454	GOT1; aspartate aminotransferase, cytoplasmic [EC:2.6.1.1]	K09100 Metabolism	K09102 Energy metabolism	K00710 Carbon fixation in photosynthetic organisms [PATH:ko00710]			PRK09257	15314500	115109000	7.51634
B1.1_TRINITY_DN165_c0_g1_i6.p2									2777400	684820000	246.569
B1.1_TRINITY_DN16507_c0_g1_i2.p1	K06943	NOG1; nucleolar GTP-binding protein	K09120 Genetic Information Processing	K09122 Translation	K03008 Ribosome biogenesis in eukaryotes [PATH:ko03008]			NOGCT	27780000	0	0
B1.1_TRINITY_DN16532_c1_g1_i1.p1								RhoGAP_fLRG1	2296170	0	0
B1.1_TRINITY_DN16533_c0_g1_i1.p1	K02872	RP-L13Ae, RPL13A; large subunit ribosomal protein L13Ae	K09120 Genetic Information Processing	K09122 Translation	K03010 Ribosome [PATH:ko03010]			PTZ00068	281650000	0	0
B1.1_TRINITY_DN16550_c0_g1_i6.p1	K04797	pfdA, PFDN5; prefoldin alpha subunit	K09180 Brite Hierarchies	K09182 Protein families: genetic information processing	K03110 Chaperones and folding catalysts [BR:ko03110]			Prefoldin_alpha	34231000	14550800	0.425077
B1.1_TRINITY_DN1656_c0_g1_i2.p1	K24962	CCDC47; PAT complex subunit CCDC47	K09180 Brite Hierarchies	K09182 Protein families: genetic information processing	K03110 Chaperones and folding catalysts [BR:ko03110]			DUF1682	35674000	0	0
B1.1_TRINITY_DN1656_c2_g1_i1.p1								DUF4203	10295000	0	0
B1.1_TRINITY_DN1657_c0_g1_i3.p1	K08794	CAMK1; calcium/calmodulin-dependent protein kinase I [EC:2.7.11.17]	K09130 Environmental Information Processing	K09132 Signal transduction	K04020 Calcium signaling pathway [PATH:ko04020]			STKc_CAMK	213880000	1781600	0.0083299
B1.1_TRINITY_DN16595_c0_g1_i1.p1								PKS	11336800	0	0
B1.1_TRINITY_DN16605_c0_g1_i1.p1								DPBB_EXLX1-like	0	34557900
B1.1_TRINITY_DN1665_c0_g1_i2.p1	K24136	pgdX; glutathione-dependent peroxiredoxin [EC:1.11.1.27]	K09100 Metabolism	K09106 Metabolism of other amino acids	K00480 Glutathione metabolism [PATH:ko00480]			AHP1	1768950000	2.62126e+09	1.48182
B1.1_TRINITY_DN1669_c0_g2_i5.p1	K00966	GMPP; mannose-1-phosphate guanylyltransferase [EC:2.7.7.13]	K09100 Metabolism	K09101 Carbohydrate metabolism	K00051 Fructose and mannose metabolism [PATH:ko00051]			M1P_guanylylT_B_like_N	300470000	27867600	0.0927467
B1.1_TRINITY_DN1669_c2_g1_i2.p1	K01897	ACSL, fadD; long-chain acyl-CoA synthetase [EC:6.2.1.3]	K09100 Metabolism	K09103 Lipid metabolism	K00061 Fatty acid biosynthesis [PATH:ko00061]				18548200	0	0
B1.1_TRINITY_DN16695_c0_g1_i1.p1									3318800	0	0
B1.1_TRINITY_DN167_c5_g1_i1.p1	K15425	PPP4R2; serine/threonine-protein phosphatase 4 regulatory subunit 2	K09180 Brite Hierarchies	K09181 Protein families: metabolism	K01009 Protein phosphatases and associated proteins [BR:ko01009]				6160600	0	0
B1.1_TRINITY_DN1670_c0_g1_i1.p1								SMC_prok_B	25848000	22999100	0.889783
B1.1_TRINITY_DN1671_c0_g1_i1.p1	K01937	pyrG, CTPS; CTP synthase [EC:6.3.4.2]	K09100 Metabolism	K09104 Nucleotide metabolism	K00240 Pyrimidine metabolism [PATH:ko00240]			PLN02327	541230000	12720000	0.023502
B1.1_TRINITY_DN1671_c0_g1_i7.p1	K01937	pyrG, CTPS; CTP synthase [EC:6.3.4.2]	K09100 Metabolism	K09104 Nucleotide metabolism	K00240 Pyrimidine metabolism [PATH:ko00240]			PLN02327	23680000	0	0
B1.1_TRINITY_DN16740_c0_g1_i4.p1	K01641	HMGCS; hydroxymethylglutaryl-CoA synthase [EC:2.3.3.10]	K09100 Metabolism	K09101 Carbohydrate metabolism	K00650 Butanoate metabolism [PATH:ko00650]			HMG-CoA-S_euk	403810000	0	0
B1.1_TRINITY_DN16754_c0_g1_i3.p1	K02152	ATPeV1G, ATP6G; V-type H+-transporting ATPase subunit G	K09100 Metabolism	K09102 Energy metabolism	K00190 Oxidative phosphorylation [PATH:ko00190]			V-ATPase_G	851600000	215690000	0.253276
B1.1_TRINITY_DN1679_c0_g2_i4.p1	K19833	CLA4; serine/threonine-protein kinase CLA4 [EC:2.7.11.1]	K09130 Environmental Information Processing	K09132 Signal transduction	K04011 MAPK signaling pathway - yeast [PATH:ko04011]			STKc_PAK	10499400	0	0
B1.1_TRINITY_DN16795_c0_g1_i1.p1	K05544	DUS3; tRNA-dihydrouridine synthase 3 [EC:1.3.1.89]	K09180 Brite Hierarchies	K09182 Protein families: genetic information processing	K03016 Transfer RNA biogenesis [BR:ko03016]			DUS_like_FMN	7318500	0	0
B1.1_TRINITY_DN168_c1_g2_i1.p1	K01183	E3.2.1.14; chitinase [EC:3.2.1.14]	K09100 Metabolism	K09101 Carbohydrate metabolism	K00520 Amino sugar and nucleotide sugar metabolism [PATH:ko00520]		GH18	Glyco_18	479600000	200132000	0.417289
B1.1_TRINITY_DN1683_c0_g1_i2.p1	K24706	SCUBE2; signal peptide, CUB and EGF-like domain-containing protein 2	K09130 Environmental Information Processing	K09132 Signal transduction	K04340 Hedgehog signaling pathway [PATH:ko04340]				25420000	0	0
B1.1_TRINITY_DN1684_c0_g1_i3.p1	K03426	E3.6.1.22, NUDT12, nudC; NAD+ diphosphatase [EC:3.6.1.22]	K09100 Metabolism	K09108 Metabolism of cofactors and vitamins	K00760 Nicotinate and nicotinamide metabolism [PATH:ko00760]			NADH_pyrophosphatase	49988000	149976000	3.00024
B1.1_TRINITY_DN16848_c0_g2_i2.p1	K09522	DNAJC2; DnaJ homolog subfamily C member 2	K09180 Brite Hierarchies	K09182 Protein families: genetic information processing	K03110 Chaperones and folding catalysts [BR:ko03110]			ZUO1	5441700	0	0
B1.1_TRINITY_DN16868_c0_g1_i3.p1								PMT1	24439000	35063000	1.43472
B1.1_TRINITY_DN1688_c0_g3_i1.p1	K04460	PPP5C; serine/threonine-protein phosphatase 5 [EC:3.1.3.16]	K09130 Environmental Information Processing	K09132 Signal transduction	K04010 MAPK signaling pathway [PATH:ko04010]			MPP_PP5_C	67420400	1263500	0.0187406
B1.1_TRINITY_DN1689_c0_g2_i3.p1									0	11862100
B1.1_TRINITY_DN16890_c0_g1_i3.p1	K00656	E2.3.1.54, pflD; formate C-acetyltransferase [EC:2.3.1.54]	K09100 Metabolism	K09101 Carbohydrate metabolism	K00620 Pyruvate metabolism [PATH:ko00620]			PFL1	1.12526e+10	1846720000	0.164115
B1.1_TRINITY_DN169_c0_g1_i11.p1	K01188	E3.2.1.21; beta-glucosidase [EC:3.2.1.21]	K09100 Metabolism	K09101 Carbohydrate metabolism	K00500 Starch and sucrose metabolism [PATH:ko00500]		GH1	Glyco_hydro_1	2530000000	1.09254e+10	4.31834
B1.1_TRINITY_DN169_c0_g1_i13.p1	K01188	E3.2.1.21; beta-glucosidase [EC:3.2.1.21]	K09100 Metabolism	K09101 Carbohydrate metabolism	K00500 Starch and sucrose metabolism [PATH:ko00500]		GH1	Glyco_hydro_1	29230000	184694000	6.31865
B1.1_TRINITY_DN169_c0_g1_i21.p1	K01188	E3.2.1.21; beta-glucosidase [EC:3.2.1.21]	K09100 Metabolism	K09101 Carbohydrate metabolism	K00500 Starch and sucrose metabolism [PATH:ko00500]		GH1	Glyco_hydro_1	36453000	98719000	2.70812
B1.1_TRINITY_DN169_c0_g1_i24.p1								Glyco_hydro_1	13122800	1472500	0.112209
B1.1_TRINITY_DN169_c0_g1_i30.p1	K01188	E3.2.1.21; beta-glucosidase [EC:3.2.1.21]	K09100 Metabolism	K09101 Carbohydrate metabolism	K00500 Starch and sucrose metabolism [PATH:ko00500]		GH1	Glyco_hydro_1	375710000	2.10195e+09	5.59461
B1.1_TRINITY_DN169_c0_g1_i33.p1	K01188	E3.2.1.21; beta-glucosidase [EC:3.2.1.21]	K09100 Metabolism	K09101 Carbohydrate metabolism	K00500 Starch and sucrose metabolism [PATH:ko00500]		GH1	Glyco_hydro_1	46390400	643880000	13.8796
B1.1_TRINITY_DN16913_c0_g1_i1.p1	K03424	tatD; TatD DNase family protein [EC:3.1.21.-]	K09180 Brite Hierarchies	K09191 Unclassified: metabolism	K99980 Enzymes with EC numbers			TatD_DNAse	0	7689600
B1.1_TRINITY_DN1694_c0_g1_i1.p1									0	12835700
B1.1_TRINITY_DN16965_c2_g1_i1.p1	K14676	NTE, NRE; lysophospholipid hydrolase [EC:3.1.1.5]	K09100 Metabolism	K09103 Lipid metabolism	K00564 Glycerophospholipid metabolism [PATH:ko00564]				913380	0	0
B1.1_TRINITY_DN1697_c0_g1_i1.p1	K01803	TPI, tpiA; triosephosphate isomerase (TIM) [EC:5.3.1.1]	K09100 Metabolism	K09101 Carbohydrate metabolism	K00010 Glycolysis / Gluconeogenesis [PATH:ko00010]			PTZ00333	4.1939e+09	34199800000	8.15465
B1.1_TRINITY_DN1697_c6_g1_i1.p1									16461800	98934000	6.00991
B1.1_TRINITY_DN16972_c0_g1_i1.p1	K11541	URA2; carbamoyl-phosphate synthase / aspartate carbamoyltransferase [EC:6.3.5.5 2.1.3.2]	K09100 Metabolism	K09104 Nucleotide metabolism	K00240 Pyrimidine metabolism [PATH:ko00240]			CPSaseII_lrg	638740000	7145700	0.0111872
B1.1_TRINITY_DN16984_c0_g1_i1.p1	K03247	EIF3H; translation initiation factor 3 subunit H	K09160 Human Diseases	K09172 Infectious disease: viral				MPN_eIF3h	486340000	2142300	0.00440494
B1.1_TRINITY_DN1699_c0_g1_i5.p1									5563700	0	0
B1.1_TRINITY_DN17_c0_g1_i1.p1								VTC1	48659000	16653000	0.342239
B1.1_TRINITY_DN1700_c1_g1_i11.p1	K12819	SLU7; pre-mRNA-processing factor SLU7	K09120 Genetic Information Processing	K09121 Transcription	K03040 Spliceosome [PATH:ko03040]			Slu7	9597500	0	0
B1.1_TRINITY_DN17013_c0_g1_i1.p1								choice_anch_A	0	2621900
B1.1_TRINITY_DN1702_c2_g1_i1.p1									159855000	612400000	3.83097
B1.1_TRINITY_DN17025_c1_g1_i1.p1									1986550	0	0
B1.1_TRINITY_DN17047_c0_g1_i3.p1	K19757	RSPH9; radial spoke head protein 9	K09180 Brite Hierarchies	K09183 Protein families: signaling and cellular processes	K04812 Cytoskeleton proteins [BR:ko04812]			Radial_spoke	11925000	0	0
B1.1_TRINITY_DN17050_c0_g1_i1.p1	K11087	SNRPD1, SMD1; small nuclear ribonucleoprotein D1	K09120 Genetic Information Processing	K09121 Transcription	K03040 Spliceosome [PATH:ko03040]			Sm_D1	26009600	0	0
B1.1_TRINITY_DN17071_c0_g1_i10.p1								Flavodoxin_1	21044700	739690	0.0351485
B1.1_TRINITY_DN17071_c0_g1_i12.p1								Flavodoxin_1	33363000	0	0
B1.1_TRINITY_DN17077_c0_g1_i2.p1	K12670	WBP1; oligosaccharyltransferase complex subunit beta	K09100 Metabolism	K09107 Glycan biosynthesis and metabolism	K00510 N-Glycan biosynthesis [PATH:ko00510]			DDOST_48kD	77689000	0	0
B1.1_TRINITY_DN17077_c1_g1_i1.p1									13734000	0	0
B1.1_TRINITY_DN17081_c7_g1_i1.p1									0	49361000
B1.1_TRINITY_DN1709_c1_g1_i6.p1									9395100	1312800	0.139732
B1.1_TRINITY_DN17106_c0_g1_i6.p1									9666900	0	0
B1.1_TRINITY_DN17106_c2_g1_i1.p1	K04043	dnaK, HSPA9; molecular chaperone DnaK	K09120 Genetic Information Processing	K09123 Folding, sorting and degradation	K03018 RNA degradation [PATH:ko03018]			HSP70	14037800	0	0
B1.1_TRINITY_DN1711_c0_g1_i3.p1	K00611	OTC, argF, argI; ornithine carbamoyltransferase [EC:2.1.3.3]	K09100 Metabolism	K09105 Amino acid metabolism	K00220 Arginine biosynthesis [PATH:ko00220]			PRK00779	864860000	47258600	0.0546431
B1.1_TRINITY_DN1711_c1_g1_i2.p1	K13201	TIA1, TIAL1; nucleolysin TIA-1/TIAR	K09180 Brite Hierarchies	K09182 Protein families: genetic information processing	K03019 Messenger RNA biogenesis [BR:ko03019]			RRM2_PUB1	5780000	0	0
B1.1_TRINITY_DN1715_c0_g1_i1.p1									2804160	327490	0.116787
B1.1_TRINITY_DN1717_c0_g1_i2.p1	K22285	OSBPL8, ORP8; oxysterol-binding protein-related protein 8	K09180 Brite Hierarchies	K09182 Protein families: genetic information processing	K04131 Membrane trafficking [BR:ko04131]			Oxysterol_BP	377810000	63636000	0.168434
B1.1_TRINITY_DN1718_c0_g1_i1.p1	K00826	E2.6.1.42, ilvE; branched-chain amino acid aminotransferase [EC:2.6.1.42]	K09100 Metabolism	K09105 Amino acid metabolism	K00270 Cysteine and methionine metabolism [PATH:ko00270]			PRK13357	1067840000	6.008e+09	5.62631
B1.1_TRINITY_DN17193_c0_g1_i4.p1	K00972	UAP1; UDP-N-acetylglucosamine/UDP-N-acetylgalactosamine diphosphorylase [EC:2.7.7.23 2.7.7.83]	K09100 Metabolism	K09101 Carbohydrate metabolism	K00520 Amino sugar and nucleotide sugar metabolism [PATH:ko00520]			UDPGlcNAc_PPase	1613180000	780450000	0.483796
B1.1_TRINITY_DN17193_c0_g2_i1.p1	K00972	UAP1; UDP-N-acetylglucosamine/UDP-N-acetylgalactosamine diphosphorylase [EC:2.7.7.23 2.7.7.83]	K09100 Metabolism	K09101 Carbohydrate metabolism	K00520 Amino sugar and nucleotide sugar metabolism [PATH:ko00520]			PLN02435	184891000	56950000	0.308019
B1.1_TRINITY_DN172_c0_g1_i1.p1	K00293	LYS9; saccharopine dehydrogenase (NADP+, L-glutamate forming) [EC:1.5.1.10]	K09100 Metabolism	K09105 Amino acid metabolism	K00300 Lysine biosynthesis [PATH:ko00300]			PLN02819	6.5884e+09	1087170000	0.165013
B1.1_TRINITY_DN1721_c1_g1_i2.p1	K02727	PSMA3; 20S proteasome subunit alpha 7 [EC:3.4.25.1]	K09120 Genetic Information Processing	K09123 Folding, sorting and degradation	K03050 Proteasome [PATH:ko03050]			proteasome_alpha_type_3	88016000	165241000	1.8774
B1.1_TRINITY_DN17223_c0_g1_i2.p1	K14018	PLAA, DOA1, UFD3; phospholipase A-2-activating protein	K09120 Genetic Information Processing	K09123 Folding, sorting and degradation	K04141 Protein processing in endoplasmic reticulum [PATH:ko04141]			PUL	3782600	0	0
B1.1_TRINITY_DN17223_c1_g1_i1.p1								vWA_interalpha_trypsin_inhibitor	3380500	0	0
B1.1_TRINITY_DN17239_c0_g1_i1.p1								Nudix_hydrolase_3	19184900	17428000	0.908423
B1.1_TRINITY_DN1726_c1_g1_i2.p1									2886800	0	0
B1.1_TRINITY_DN1726_c8_g1_i1.p1									0	3494500
B1.1_TRINITY_DN17266_c0_g1_i1.p1									3795100	0	0
B1.1_TRINITY_DN1727_c0_g1_i1.p1	K03257	EIF4A; translation initiation factor 4A	K09180 Brite Hierarchies	K09182 Protein families: genetic information processing	K03019 Messenger RNA biogenesis [BR:ko03019]			PTZ00424	3.5337e+09	332341000	0.094049
B1.1_TRINITY_DN17282_c0_g1_i1.p1							CE4	CE4_ClCDA_like	2559300	56921000	22.2408
B1.1_TRINITY_DN1732_c1_g1_i1.p1									2587000	0	0
B1.1_TRINITY_DN17320_c0_g1_i2.p1	K20792	NAA15_16; N-alpha-acetyltransferase 15/16, NatA auxiliary subunit	K09180 Brite Hierarchies	K09182 Protein families: genetic information processing	K03036 Chromosome and associated proteins [BR:ko03036]			NARP1	58805000	0	0
B1.1_TRINITY_DN17320_c0_g1_i3.p1	K20792	NAA15_16; N-alpha-acetyltransferase 15/16, NatA auxiliary subunit	K09180 Brite Hierarchies	K09182 Protein families: genetic information processing	K03036 Chromosome and associated proteins [BR:ko03036]			NARP1	17588300	0	0
B1.1_TRINITY_DN1733_c4_g1_i1.p1									0	1651200
B1.1_TRINITY_DN17370_c0_g2_i1.p1	K00327	POR; NADPH-ferrihemoprotein reductase [EC:1.6.2.4]	K09180 Brite Hierarchies	K09191 Unclassified: metabolism	K99980 Enzymes with EC numbers			CYPOR	20918000	0	0
B1.1_TRINITY_DN17381_c0_g1_i1.p1								Phd_like_VIAF	10350600	0	0
B1.1_TRINITY_DN17394_c1_g1_i1.p1	K23038	ZC3H14; zinc finger CCCH domain-containing protein 14	K09180 Brite Hierarchies	K09182 Protein families: genetic information processing	K03019 Messenger RNA biogenesis [BR:ko03019]				115405000	16939000	0.146779
B1.1_TRINITY_DN1741_c0_g1_i2.p1									21053200	0	0
B1.1_TRINITY_DN1741_c1_g2_i2.p1									0	3466100
B1.1_TRINITY_DN1741_c3_g1_i2.p1	K01537	ATP2C; P-type Ca2+ transporter type 2C [EC:7.2.2.10]	K09180 Brite Hierarchies	K09191 Unclassified: metabolism	K99980 Enzymes with EC numbers			P-type_ATPase_Ca_prok	13351700	0	0
B1.1_TRINITY_DN1742_c0_g1_i6.p2	K15042	KPNA5_6; importin subunit alpha-6/7	K09120 Genetic Information Processing	K09122 Translation	K03013 Nucleocytoplasmic transport [PATH:ko03013]			SRP1	19282900	0	0
B1.1_TRINITY_DN1742_c0_g1_i8.p1	K15042	KPNA5_6; importin subunit alpha-6/7	K09120 Genetic Information Processing	K09122 Translation	K03013 Nucleocytoplasmic transport [PATH:ko03013]			SRP1	107191000	0	0
B1.1_TRINITY_DN1742_c6_g1_i1.p1	K02327	POLD1; DNA polymerase delta subunit 1 [EC:2.7.7.7]	K09120 Genetic Information Processing	K09124 Replication and repair	K03030 DNA replication [PATH:ko03030]			PTZ00166	7794800	0	0
B1.1_TRINITY_DN1744_c0_g1_i1.p1	K08773	RALBP1; RalA-binding protein 1	K09130 Environmental Information Processing	K09132 Signal transduction	K04014 Ras signaling pathway [PATH:ko04014]				1183900	0	0
B1.1_TRINITY_DN17444_c1_g1_i5.p1	K10885	XRCC5, KU80, G22P2; ATP-dependent DNA helicase 2 subunit 2	K09120 Genetic Information Processing	K09124 Replication and repair	K03450 Non-homologous end-joining [PATH:ko03450]				9675800	0	0
B1.1_TRINITY_DN17447_c0_g4_i1.p1									0	9150500
B1.1_TRINITY_DN1746_c0_g1_i8.p1	K14648	ENDOU, PP11; poly(U)-specific endoribonuclease [EC:3.1.-.-]	K09180 Brite Hierarchies	K09191 Unclassified: metabolism	K99980 Enzymes with EC numbers			XendoU	73044000	3038700	0.041601
B1.1_TRINITY_DN17468_c0_g1_i2.p1	K18578	CEL74A; xyloglucan-specific exo-beta-1,4-glucanase [EC:3.2.1.155]	K09180 Brite Hierarchies	K09191 Unclassified: metabolism	K99980 Enzymes with EC numbers	CBM_10	GH74+fungi_doc	CBM_10	0	877460000
B1.1_TRINITY_DN1747_c0_g1_i1.p1	K03063	PSMC4, RPT3; 26S proteasome regulatory subunit T3	K09120 Genetic Information Processing	K09123 Folding, sorting and degradation	K03050 Proteasome [PATH:ko03050]			PTZ00454	484340000	34123000	0.0704526
B1.1_TRINITY_DN1747_c1_g1_i1.p1	K10755	RFC2_4; replication factor C subunit 2/4	K09120 Genetic Information Processing	K09124 Replication and repair	K03030 DNA replication [PATH:ko03030]			PLN03025	15857000	0	0
B1.1_TRINITY_DN1747_c2_g1_i2.p1	K01836	PGM3; phosphoacetylglucosamine mutase [EC:5.4.2.3]	K09100 Metabolism	K09101 Carbohydrate metabolism	K00520 Amino sugar and nucleotide sugar metabolism [PATH:ko00520]			PGM3	627980000	520300000	0.82853
B1.1_TRINITY_DN17487_c0_g1_i1.p1	K12472	EPS15; epidermal growth factor receptor substrate 15	K09140 Cellular Processes	K09141 Transport and catabolism	K04144 Endocytosis [PATH:ko04144]			EH	20644300	0	0
B1.1_TRINITY_DN175_c0_g1_i5.p1	K03231	EEF1A; elongation factor 1-alpha	K09120 Genetic Information Processing	K09122 Translation	K03013 Nucleocytoplasmic transport [PATH:ko03013]			PTZ00141	62443000000	3.52822e+09	0.0565031
B1.1_TRINITY_DN17518_c0_g1_i1.p1	K00667	FAS2; fatty acid synthase subunit alpha, fungi type [EC:2.3.1.86]	K09100 Metabolism	K09103 Lipid metabolism	K00061 Fatty acid biosynthesis [PATH:ko00061]			FabG2	120820000	0	0
B1.1_TRINITY_DN1753_c0_g2_i5.p1	K10707	VAPB, ALS8; vesicle-associated membrane protein-associated protein B	K09150 Organismal Systems	K09154 Digestive system				Motile_Sperm	144411000	141302000	0.978471
B1.1_TRINITY_DN17546_c1_g1_i1.p1	K02999	RPA1, POLR1A; DNA-directed RNA polymerase I subunit RPA1 [EC:2.7.7.6]	K09120 Genetic Information Processing	K09121 Transcription	K03020 RNA polymerase [PATH:ko03020]				28257000	0	0
B1.1_TRINITY_DN17558_c0_g1_i1.p1	K03242	EIF2S3; translation initiation factor 2 subunit 3	K09180 Brite Hierarchies	K09182 Protein families: genetic information processing	K03012 Translation factors [BR:ko03012]			PTZ00327	1135920000	24951200	0.0219656
B1.1_TRINITY_DN17586_c0_g1_i1.p1									1590800	0	0
B1.1_TRINITY_DN1760_c0_g2_i9.p1	K09497	CCT5; T-complex protein 1 subunit epsilon	K09180 Brite Hierarchies	K09182 Protein families: genetic information processing	K03110 Chaperones and folding catalysts [BR:ko03110]			TCP1_epsilon	533390000	32991000	0.0618516
B1.1_TRINITY_DN1762_c0_g1_i3.p1	K04630	GNAI; guanine nucleotide-binding protein G(i) subunit alpha	K09130 Environmental Information Processing	K09132 Signal transduction	K04015 Rap1 signaling pathway [PATH:ko04015]			G-alpha	520210000	40827900	0.0784835
B1.1_TRINITY_DN1762_c0_g2_i9.p1	K05857	PLCD; phosphatidylinositol phospholipase C, delta [EC:3.1.4.11]	K09100 Metabolism	K09101 Carbohydrate metabolism	K00562 Inositol phosphate metabolism [PATH:ko00562]			PI-PLCc_eukaryota	647930000	0	0
B1.1_TRINITY_DN1765_c0_g4_i1.p1	K03243	EIF5B; translation initiation factor 5B	K09180 Brite Hierarchies	K09182 Protein families: genetic information processing	K03012 Translation factors [BR:ko03012]			PRK04004	214406000	0	0
B1.1_TRINITY_DN17650_c2_g2_i1.p1	K00693	GYS; glycogen synthase [EC:2.4.1.11]	K09100 Metabolism	K09101 Carbohydrate metabolism	K00500 Starch and sucrose metabolism [PATH:ko00500]			Glycogen_syn	43380400	9319700	0.214837
B1.1_TRINITY_DN17658_c0_g1_i1.p1	K19881	BUD7, BCH1; Chs5-Arf1p-binding protein BUD7/BCH1	K09180 Brite Hierarchies	K09182 Protein families: genetic information processing	K04131 Membrane trafficking [BR:ko04131]			ChAPs	9834600	0	0
B1.1_TRINITY_DN17669_c0_g2_i1.p1									36664000	3663000	0.0999073
B1.1_TRINITY_DN17670_c0_g1_i2.p1									6232800	0	0
B1.1_TRINITY_DN177_c0_g1_i3.p1	K01868	TARS, thrS; threonyl-tRNA synthetase [EC:6.1.1.3]	K09120 Genetic Information Processing	K09122 Translation	K00970 Aminoacyl-tRNA biosynthesis [PATH:ko00970]			PLN02908	3.4013e+09	200687000	0.059003
B1.1_TRINITY_DN1771_c0_g1_i4.p1	K02737	PSMB5; 20S proteasome subunit beta 5 [EC:3.4.25.1]	K09120 Genetic Information Processing	K09123 Folding, sorting and degradation	K03050 Proteasome [PATH:ko03050]			proteasome_beta_type_5	242720000	334064000	1.37633
B1.1_TRINITY_DN17751_c1_g1_i5.p1	K04532	NAE1, APPBP1; NEDD8-activating enzyme E1 regulatory subunit	K09160 Human Diseases	K09164 Neurodegenerative disease				APPBP1_RUB	6450000	0	0
B1.1_TRINITY_DN17770_c0_g4_i1.p1	K03012	RPB4, POLR2D; DNA-directed RNA polymerase II subunit RPB4	K09120 Genetic Information Processing	K09121 Transcription	K03020 RNA polymerase [PATH:ko03020]			RPB4	1749000	4055100	2.31852
B1.1_TRINITY_DN17776_c3_g1_i1.p1	K01597	MVD, mvaD; diphosphomevalonate decarboxylase [EC:4.1.1.33]	K09100 Metabolism	K09109 Metabolism of terpenoids and polyketides	K00900 Terpenoid backbone biosynthesis [PATH:ko00900]			PLN02407	63564000	237666000	3.739
B1.1_TRINITY_DN1778_c2_g1_i1.p1	K11094	SNRPB2; U2 small nuclear ribonucleoprotein B''	K09120 Genetic Information Processing	K09121 Transcription	K03040 Spliceosome [PATH:ko03040]			RRM2_SNF	28761000	4613600	0.160412
B1.1_TRINITY_DN17793_c0_g1_i2.p1									0	16513000
B1.1_TRINITY_DN17797_c1_g2_i1.p1								AKR_YeaE	47198000	22162200	0.469558
B1.1_TRINITY_DN178_c0_g1_i8.p1	K08054	CANX; calnexin	K09120 Genetic Information Processing	K09123 Folding, sorting and degradation	K04141 Protein processing in endoplasmic reticulum [PATH:ko04141]			Calreticulin	886560000	22372800	0.0252355
B1.1_TRINITY_DN178_c0_g2_i1.p1								PABP-1234	1218180000	318701000	0.261621
B1.1_TRINITY_DN1780_c0_g1_i4.p1	K05546	GANAB; mannosyl-oligosaccharide alpha-1,3-glucosidase [EC:3.2.1.207]	K09100 Metabolism	K09107 Glycan biosynthesis and metabolism	K00510 N-Glycan biosynthesis [PATH:ko00510]			GH31_GANC_GANAB_alpha	28240000	3955400	0.140064
B1.1_TRINITY_DN1785_c1_g1_i3.p1	K00031	IDH1, IDH2, icd; isocitrate dehydrogenase [EC:1.1.1.42]	K09100 Metabolism	K09101 Carbohydrate metabolism	K00020 Citrate cycle (TCA cycle) [PATH:ko00020]			PTZ00435	3.9977e+09	5.0285e+09	1.25785
B1.1_TRINITY_DN17857_c2_g1_i1.p1	K05288	PIGO; GPI ethanolamine phosphate transferase 3 subunit O [EC:2.7.-.-]	K09100 Metabolism	K09107 Glycan biosynthesis and metabolism	K00563 Glycosylphosphatidylinositol (GPI)-anchor biosynthesis [PATH:ko00563]			GPI_EPT_3	1468700	0	0
B1.1_TRINITY_DN17864_c0_g1_i4.p1								W2_eIF5	325500000	9493300	0.0291653
B1.1_TRINITY_DN17864_c0_g2_i3.p1	K01518	NUDT2; bis(5'-nucleosidyl)-tetraphosphatase [EC:3.6.1.17]	K09100 Metabolism	K09104 Nucleotide metabolism	K00230 Purine metabolism [PATH:ko00230]			Ap4A_hydrolase_human_like	202005000	16927200	0.0837959
B1.1_TRINITY_DN1788_c0_g1_i2.p1	K19355	MAN; mannan endo-1,4-beta-mannosidase [EC:3.2.1.78]	K09100 Metabolism	K09101 Carbohydrate metabolism	K00051 Fructose and mannose metabolism [PATH:ko00051]	CBM_10	GH5_7+fungi_doc	COG3934	0	3.95249e+09
B1.1_TRINITY_DN179_c0_g1_i1.p1							GH48	Glyco_hydro_48	12443500	3.9648e+09	318.624
B1.1_TRINITY_DN179_c0_g1_i3.p1							GH48	Glyco_hydro_48	82684000	584360000	7.06739
B1.1_TRINITY_DN179_c0_g1_i5.p1							GH48	Glyco_hydro_48	0	928250000
B1.1_TRINITY_DN179_c0_g1_i6.p1								Glyco_hydro_48	47358000	3945500000	83.3122
B1.1_TRINITY_DN17916_c0_g1_i3.p1	K15371	GDH2; glutamate dehydrogenase [EC:1.4.1.2]	K09100 Metabolism	K09102 Energy metabolism	K00910 Nitrogen metabolism [PATH:ko00910]			PTZ00324	22827500	0	0
B1.1_TRINITY_DN17916_c0_g1_i5.p1	K15371	GDH2; glutamate dehydrogenase [EC:1.4.1.2]	K09100 Metabolism	K09102 Energy metabolism	K00910 Nitrogen metabolism [PATH:ko00910]			PTZ00324	12466200	0	0
B1.1_TRINITY_DN1792_c0_g1_i1.p1								ER_PDI_fam	34066000	0	0
B1.1_TRINITY_DN1792_c1_g1_i2.p1	K12622	LSM3; U6 snRNA-associated Sm-like protein LSm3	K09120 Genetic Information Processing	K09121 Transcription	K03040 Spliceosome [PATH:ko03040]			LSm3	2311700	4610200	1.99429
B1.1_TRINITY_DN17921_c2_g1_i1.p1	K20310	TRAPPC13; trafficking protein particle complex subunit 13	K09180 Brite Hierarchies	K09182 Protein families: genetic information processing	K04131 Membrane trafficking [BR:ko04131]			DUF974	10365400	0	0
B1.1_TRINITY_DN17968_c1_g1_i1.p1									969640	0	0
B1.1_TRINITY_DN1798_c0_g2_i2.p1									47092000	0	0
B1.1_TRINITY_DN1798_c1_g1_i8.p1	K12829	SF3B2, SAP145, CUS1; splicing factor 3B subunit 2	K09120 Genetic Information Processing	K09121 Transcription	K03040 Spliceosome [PATH:ko03040]			CUS1	3353900	0	0
B1.1_TRINITY_DN17986_c0_g1_i4.p1									1562900	0	0
B1.1_TRINITY_DN17988_c0_g1_i1.p1									10542700	0	0
B1.1_TRINITY_DN17989_c0_g1_i3.p1	K12404	GGA; ADP-ribosylation factor-binding protein GGA	K09140 Cellular Processes	K09141 Transport and catabolism	K04142 Lysosome [PATH:ko04142]			VHS_GGA_fungi	12763200	1487400	0.116538
B1.1_TRINITY_DN17993_c0_g1_i9.p1	K03372	SLC33A1, ACATN; MFS transporter, PAT family, solute carrier family 33 (acetyl-CoA transportor), member 1 [EC:2.3.1.-]	K09100 Metabolism	K09107 Glycan biosynthesis and metabolism	K00604 Glycosphingolipid biosynthesis - ganglio series [PATH:ko00604]			Acatn	2222900	0	0
B1.1_TRINITY_DN17993_c1_g1_i2.p1	K14799	TSR1; pre-rRNA-processing protein TSR1	K09180 Brite Hierarchies	K09182 Protein families: genetic information processing	K03009 Ribosome biogenesis [BR:ko03009]			RIBIOP_C	3708700	0	0
B1.1_TRINITY_DN17997_c0_g1_i1.p1									21069100	0	0
B1.1_TRINITY_DN18_c0_g2_i1.p1							GH114	Glyco_hydro_114	33492000	52172000	1.55775
B1.1_TRINITY_DN180_c0_g1_i1.p1	K02739	PSMB7; 20S proteasome subunit beta 2 [EC:3.4.25.1]	K09120 Genetic Information Processing	K09123 Folding, sorting and degradation	K03050 Proteasome [PATH:ko03050]			proteasome_beta_type_7	104449000	130213000	1.24667
B1.1_TRINITY_DN180_c1_g1_i1.p1	K23921	EFHD1; EF-hand domain-containing family member D1	K09180 Brite Hierarchies	K09183 Protein families: signaling and cellular processes	K04990 Domain-containing proteins not elsewhere classified [BR:ko04990]			EFh	0	250392000
B1.1_TRINITY_DN180_c2_g1_i2.p1	K02865	RP-L10Ae, RPL10A; large subunit ribosomal protein L10Ae	K09120 Genetic Information Processing	K09122 Translation	K03010 Ribosome [PATH:ko03010]			PTZ00029	1429320000	230797000	0.161473
B1.1_TRINITY_DN1801_c0_g1_i1.p1									8190000	0	0
B1.1_TRINITY_DN1804_c1_g1_i2.p1									2774700	0	0
B1.1_TRINITY_DN18043_c1_g1_i2.p1	K00850	pfkA, PFK; 6-phosphofructokinase 1 [EC:2.7.1.11]	K09100 Metabolism	K09101 Carbohydrate metabolism	K00010 Glycolysis / Gluconeogenesis [PATH:ko00010]			6PF1K_euk	1109610000	52120800	0.0469722
B1.1_TRINITY_DN18054_c0_g1_i1.p1								Ank_2	4438900	0	0
B1.1_TRINITY_DN1806_c0_g1_i2.p1									242312000	24370000	0.100573
B1.1_TRINITY_DN1807_c2_g1_i1.p1	K23333	RMND5; E3 ubiquitin-protein transferase RMND5 [EC:2.3.2.27]	K09180 Brite Hierarchies	K09182 Protein families: genetic information processing	K04121 Ubiquitin system [BR:ko04121]			COG5109	2054500	0	0
B1.1_TRINITY_DN1809_c0_g1_i2.p1									1269000	0	0
B1.1_TRINITY_DN1810_c0_g1_i1.p1	K01341	KEX2; kexin [EC:3.4.21.61]	K09180 Brite Hierarchies	K09181 Protein families: metabolism	K01002 Peptidases and inhibitors [BR:ko01002]			P_proprotein	0	7783800
B1.1_TRINITY_DN1810_c1_g2_i2.p1	K01897	ACSL, fadD; long-chain acyl-CoA synthetase [EC:6.2.1.3]	K09100 Metabolism	K09103 Lipid metabolism	K00061 Fatty acid biosynthesis [PATH:ko00061]			LC-FACS_euk	10512900	0	0
B1.1_TRINITY_DN18117_c0_g2_i1.p1									1858400	0	0
B1.1_TRINITY_DN18135_c0_g1_i1.p1	K00858	ppnK, NADK; NAD+ kinase [EC:2.7.1.23]	K09100 Metabolism	K09108 Metabolism of cofactors and vitamins	K00760 Nicotinate and nicotinamide metabolism [PATH:ko00760]			PLN02727	1892800	0	0
B1.1_TRINITY_DN1816_c0_g1_i2.p1	K15192	BTAF1, MOT1; TATA-binding protein-associated factor [EC:3.6.4.-]	K09180 Brite Hierarchies	K09182 Protein families: genetic information processing	K03021 Transcription machinery [BR:ko03021]				4907700	0	0
B1.1_TRINITY_DN1816_c1_g2_i3.p1	K01591	pyrF; orotidine-5'-phosphate decarboxylase [EC:4.1.1.23]	K09100 Metabolism	K09104 Nucleotide metabolism	K00240 Pyrimidine metabolism [PATH:ko00240]			OMPdecase	191222000	69871000	0.365392
B1.1_TRINITY_DN1817_c2_g1_i6.p1	K26405							DUF814	6414400	2901300	0.45231
B1.1_TRINITY_DN18176_c0_g1_i3.p1	K18477	RMT2; type IV protein arginine methyltransferase [EC:2.1.1.322]	K09180 Brite Hierarchies	K09182 Protein families: genetic information processing	K03036 Chromosome and associated proteins [BR:ko03036]				17847700	0	0
B1.1_TRINITY_DN1818_c0_g1_i3.p1									46787000	4375900	0.0935281
B1.1_TRINITY_DN1818_c6_g1_i1.p1	K02903	RP-L28e, RPL28; large subunit ribosomal protein L28e	K09120 Genetic Information Processing	K09122 Translation	K03010 Ribosome [PATH:ko03010]			Ribosomal_L28e	930950000	190625100	0.204764
B1.1_TRINITY_DN18197_c0_g1_i2.p1	K01179	E3.2.1.4; endoglucanase [EC:3.2.1.4]	K09100 Metabolism	K09101 Carbohydrate metabolism	K00500 Starch and sucrose metabolism [PATH:ko00500]			Glyco_hydro_9	34253000	402201000	11.7421
B1.1_TRINITY_DN18203_c0_g1_i2.p1								LOR	29636000	0	0
B1.1_TRINITY_DN1823_c0_g2_i1.p1	K02910	RP-L31e, RPL31; large subunit ribosomal protein L31e	K09120 Genetic Information Processing	K09122 Translation	K03010 Ribosome [PATH:ko03010]			Ribosomal_L31e	561490000	82554000	0.147027
B1.1_TRINITY_DN1823_c1_g1_i4.p1								SCAI	65731000	39360400	0.59881
B1.1_TRINITY_DN1823_c11_g1_i1.p1	K01872	AARS, alaS; alanyl-tRNA synthetase [EC:6.1.1.7]	K09120 Genetic Information Processing	K09122 Translation	K00970 Aminoacyl-tRNA biosynthesis [PATH:ko00970]			PLN02900	94073000	4645500	0.0493819
B1.1_TRINITY_DN1824_c0_g1_i3.p1	K02731	PSMA7; 20S proteasome subunit alpha 4 [EC:3.4.25.1]	K09120 Genetic Information Processing	K09123 Folding, sorting and degradation	K03050 Proteasome [PATH:ko03050]			proteasome_alpha_type_7	380010000	518490000	1.36441
B1.1_TRINITY_DN183_c16_g1_i1.p1	K02951	RP-S12e, RPS12; small subunit ribosomal protein S12e	K09120 Genetic Information Processing	K09122 Translation	K03010 Ribosome [PATH:ko03010]			Ribosomal_L7Ae	1581470000	1407980000	0.890298
B1.1_TRINITY_DN183_c5_g1_i4.p1	K00948	PRPS, prsA; ribose-phosphate pyrophosphokinase [EC:2.7.6.1]	K09100 Metabolism	K09101 Carbohydrate metabolism	K00030 Pentose phosphate pathway [PATH:ko00030]			PrsA	969880000	221823000	0.228712
B1.1_TRINITY_DN183_c8_g1_i4.p1									4114400	0	0
B1.1_TRINITY_DN18301_c5_g1_i1.p2									54450000	0	0
B1.1_TRINITY_DN1831_c1_g1_i1.p1									43430000	149687000	3.44663
B1.1_TRINITY_DN1832_c0_g1_i1.p1	K01740	metY; O-acetylhomoserine (thiol)-lyase [EC:2.5.1.49]	K09100 Metabolism	K09105 Amino acid metabolism	K00270 Cysteine and methionine metabolism [PATH:ko00270]			OAH_OAS_sulfhy	3.6247e+09	474870000	0.131009
B1.1_TRINITY_DN18328_c1_g1_i1.p1	K00134	GAPDH, gapA; glyceraldehyde 3-phosphate dehydrogenase (phosphorylating) [EC:1.2.1.12]	K09100 Metabolism	K09101 Carbohydrate metabolism	K00010 Glycolysis / Gluconeogenesis [PATH:ko00010]			PLN02272	0	11016800
B1.1_TRINITY_DN1833_c1_g1_i2.p1	K02155	ATPeV0C, ATP6L; V-type H+-transporting ATPase 16kDa proteolipid subunit	K09100 Metabolism	K09102 Energy metabolism	K00190 Oxidative phosphorylation [PATH:ko00190]			V_ATP_synt_C	97669000	0	0
B1.1_TRINITY_DN1834_c0_g1_i1.p1	K01187	malZ; alpha-glucosidase [EC:3.2.1.20]	K09100 Metabolism	K09101 Carbohydrate metabolism	K00052 Galactose metabolism [PATH:ko00052]		CBM26	NtCtMGAM_N	3657500	3.0555e+09	835.407
B1.1_TRINITY_DN1834_c0_g2_i1.p1								NtCtMGAM_N	0	3142000
B1.1_TRINITY_DN1835_c0_g1_i2.p1								STKc_MPK1	3902600	0	0
B1.1_TRINITY_DN18433_c0_g2_i1.p1	K14844	PUF6; pumilio homology domain family member 6	K09180 Brite Hierarchies	K09182 Protein families: genetic information processing	K03019 Messenger RNA biogenesis [BR:ko03019]			CPL	17324400	0	0
B1.1_TRINITY_DN18434_c0_g1_i1.p1								UPF0172	19102500	0	0
B1.1_TRINITY_DN1845_c1_g1_i3.p1	K03754	EIF2B2; translation initiation factor eIF-2B subunit beta	K09160 Human Diseases	K09172 Infectious disease: viral					20546900	0	0
B1.1_TRINITY_DN18452_c0_g1_i4.p1									34175000	2295300	0.0671631
B1.1_TRINITY_DN18452_c0_g1_i8.p1									13234500	1390000	0.105029
B1.1_TRINITY_DN18455_c0_g1_i5.p1	K12194	CHMP4A_B, SNF7, VPS32A_B; charged multivesicular body protein 4A/B	K09140 Cellular Processes	K09141 Transport and catabolism	K04144 Endocytosis [PATH:ko04144]			Snf7	46969000	3443100	0.0733058
B1.1_TRINITY_DN1846_c0_g2_i2.p1	K10754	RFC1; replication factor C subunit 1	K09120 Genetic Information Processing	K09124 Replication and repair	K03030 DNA replication [PATH:ko03030]			PRK04195	3190500	0	0
B1.1_TRINITY_DN18468_c0_g1_i1.p1								Chs3p	23297000	0	0
B1.1_TRINITY_DN1848_c0_g1_i1.p1	K14007	SEC24; protein transport protein SEC24	K09120 Genetic Information Processing	K09123 Folding, sorting and degradation	K04141 Protein processing in endoplasmic reticulum [PATH:ko04141]			COG5028	15443000	0	0
B1.1_TRINITY_DN1848_c1_g1_i1.p1	K09494	CCT2; T-complex protein 1 subunit beta	K09180 Brite Hierarchies	K09182 Protein families: genetic information processing	K03110 Chaperones and folding catalysts [BR:ko03110]			TCP1_beta	195215000	13357700	0.0684256
B1.1_TRINITY_DN1849_c0_g1_i1.p1								HMG-box_NHP10-like	970890	0	0
B1.1_TRINITY_DN1849_c1_g1_i2.p1									536000	0	0
B1.1_TRINITY_DN18495_c0_g1_i1.p1	K02885	RP-L19e, RPL19; large subunit ribosomal protein L19e	K09120 Genetic Information Processing	K09122 Translation	K03010 Ribosome [PATH:ko03010]			Ribosomal_L19e_E	320970000	1953900	0.00608748
B1.1_TRINITY_DN18496_c1_g2_i1.p1	K05662	ABCB7, ATM; ATP-binding cassette, subfamily B (MDR/TAP), member 7	K09130 Environmental Information Processing	K09131 Membrane transport	K02010 ABC transporters [PATH:ko02010]			ATM1	25997000	0	0
B1.1_TRINITY_DN185_c0_g1_i1.p1								BAR_Gvp36	179427000	57282000	0.31925
B1.1_TRINITY_DN1851_c2_g1_i1.p1	K25450							LRR_RI	1871270	0	0
B1.1_TRINITY_DN18536_c0_g1_i2.p1	K01191	MAN2C1; alpha-mannosidase [EC:3.2.1.24]	K09100 Metabolism	K09107 Glycan biosynthesis and metabolism	K00511 Other glycan degradation [PATH:ko00511]			Alpha-mann_mid	7421600	18912400	2.54829
B1.1_TRINITY_DN18543_c0_g1_i4.p1	K08798	MARK; MAP/microtubule affinity-regulating kinase [EC:2.7.11.1]	K09180 Brite Hierarchies	K09181 Protein families: metabolism	K01001 Protein kinases [BR:ko01001]			STKc_SIK	4953800	0	0
B1.1_TRINITY_DN1857_c0_g1_i1.p1	K00656	E2.3.1.54, pflD; formate C-acetyltransferase [EC:2.3.1.54]	K09100 Metabolism	K09101 Carbohydrate metabolism	K00620 Pyruvate metabolism [PATH:ko00620]			PFL1	269765000	442963000	1.64203
B1.1_TRINITY_DN1857_c0_g1_i10.p1	K00656	E2.3.1.54, pflD; formate C-acetyltransferase [EC:2.3.1.54]	K09100 Metabolism	K09101 Carbohydrate metabolism	K00620 Pyruvate metabolism [PATH:ko00620]			PFL1	4.1005e+09	863820000	0.210662
B1.1_TRINITY_DN1857_c0_g1_i3.p1	K00656	E2.3.1.54, pflD; formate C-acetyltransferase [EC:2.3.1.54]	K09100 Metabolism	K09101 Carbohydrate metabolism	K00620 Pyruvate metabolism [PATH:ko00620]			PFL1	693430000	102977000	0.148504
B1.1_TRINITY_DN18573_c2_g1_i1.p1								CotH	0	183893000
B1.1_TRINITY_DN18579_c0_g1_i1.p1	K00698	CHS1; chitin synthase [EC:2.4.1.16]	K09100 Metabolism	K09101 Carbohydrate metabolism	K00520 Amino sugar and nucleotide sugar metabolism [PATH:ko00520]			Chitin_synth_1	41688000	0	0
B1.1_TRINITY_DN18586_c0_g2_i2.p1	K25470							DUF667	8808200	0	0
B1.1_TRINITY_DN1859_c0_g1_i3.p1	K05765	CFL; cofilin	K09140 Cellular Processes	K09142 Cell motility	K04810 Regulation of actin cytoskeleton [PATH:ko04810]			ADF_cofilin_like	964220000	192098000	0.199226
B1.1_TRINITY_DN1859_c7_g1_i1.p1									0	6084300
B1.1_TRINITY_DN186_c0_g2_i4.p1	K00844	HK; hexokinase [EC:2.7.1.1]	K09100 Metabolism	K09101 Carbohydrate metabolism	K00010 Glycolysis / Gluconeogenesis [PATH:ko00010]			COG5026	2.8736e+09	381520000	0.132767
B1.1_TRINITY_DN18625_c6_g1_i1.p1	K15532	yteR, yesR; unsaturated rhamnogalacturonyl hydrolase [EC:3.2.1.172]	K09180 Brite Hierarchies	K09191 Unclassified: metabolism	K99980 Enzymes with EC numbers		GH105	Glyco_hydro_88	75813000	62926000	0.830016
B1.1_TRINITY_DN18659_c0_g1_i3.p1								Glyco_hydro_1	0	4372600
B1.1_TRINITY_DN18659_c0_g1_i8.p1							GH1	Glyco_hydro_1	0	54098000
B1.1_TRINITY_DN1866_c0_g2_i2.p1	K12483	EHD1; EH domain-containing protein 1	K09140 Cellular Processes	K09141 Transport and catabolism	K04144 Endocytosis [PATH:ko04144]			EHD	16846700	4670800	0.277253
B1.1_TRINITY_DN1866_c0_g4_i1.p1									3510100	0	0
B1.1_TRINITY_DN18672_c0_g1_i1.p1									799700	0	0
B1.1_TRINITY_DN1868_c0_g2_i3.p1	K01259	pip; proline iminopeptidase [EC:3.4.11.5]	K09100 Metabolism	K09105 Amino acid metabolism	K00330 Arginine and proline metabolism [PATH:ko00330]			pro_imino_pep_1	61132000	193353000	3.16288
B1.1_TRINITY_DN1868_c0_g4_i1.p1	K01259	pip; proline iminopeptidase [EC:3.4.11.5]	K09100 Metabolism	K09105 Amino acid metabolism	K00330 Arginine and proline metabolism [PATH:ko00330]			pro_imino_pep_1	26314600	60088000	2.28345
B1.1_TRINITY_DN1868_c0_g4_i2.p1	K01259	pip; proline iminopeptidase [EC:3.4.11.5]	K09100 Metabolism	K09105 Amino acid metabolism	K00330 Arginine and proline metabolism [PATH:ko00330]			pro_imino_pep_1	26931000	126743000	4.70621
B1.1_TRINITY_DN1869_c0_g1_i1.p1	K17255	GDI1_2; Rab GDP dissociation inhibitor	K09180 Brite Hierarchies	K09183 Protein families: signaling and cellular processes	K04147 Exosome [BR:ko04147]			PTZ00363	1201100000	602850000	0.501915
B1.1_TRINITY_DN1871_c1_g1_i4.p1	K01951	guaA, GMPS; GMP synthase (glutamine-hydrolysing) [EC:6.3.5.2]	K09100 Metabolism	K09104 Nucleotide metabolism	K00230 Purine metabolism [PATH:ko00230]			guaA	180019000	427640000	2.37553
B1.1_TRINITY_DN1872_c1_g2_i1.p1									9935400	47940000	4.82517
B1.1_TRINITY_DN18724_c1_g2_i1.p1									0	85701000
B1.1_TRINITY_DN18724_c2_g1_i1.p1									79879000	9095900	0.113871
B1.1_TRINITY_DN1876_c0_g1_i1.p1	K24524	CPNE1_2_3; copine 1/2/3	K09180 Brite Hierarchies	K09183 Protein families: signaling and cellular processes	K04990 Domain-containing proteins not elsewhere classified [BR:ko04990]			vWA_copine_like	10465000	7934100	0.758156
B1.1_TRINITY_DN1877_c2_g1_i1.p1	K10706	SETX, ALS4; senataxin [EC:3.6.4.-]	K09160 Human Diseases	K09164 Neurodegenerative disease				DEXXQc_SETX	3000900	0	0
B1.1_TRINITY_DN18809_c0_g1_i1.p1									231460000	39683000	0.171446
B1.1_TRINITY_DN18809_c0_g1_i4.p2								Mplasa_alph_rch	160936000	29186000	0.181352
B1.1_TRINITY_DN1881_c0_g1_i3.p1									5168200	0	0
B1.1_TRINITY_DN1885_c0_g1_i10.p1									0	122860000
B1.1_TRINITY_DN1885_c0_g1_i11.p2									0	43727000
B1.1_TRINITY_DN1885_c0_g1_i6.p1									0	373686600
B1.1_TRINITY_DN18864_c1_g1_i1.p1	K03255	TIF31, CLU1; protein TIF31	K09180 Brite Hierarchies	K09182 Protein families: genetic information processing	K03012 Translation factors [BR:ko03012]				5800400	0	0
B1.1_TRINITY_DN1887_c0_g1_i2.p1	K19833	CLA4; serine/threonine-protein kinase CLA4 [EC:2.7.11.1]	K09130 Environmental Information Processing	K09132 Signal transduction	K04011 MAPK signaling pathway - yeast [PATH:ko04011]			PH_Cla4_Ste20	3137400	0	0
B1.1_TRINITY_DN1888_c0_g1_i5.p2									699510	548820	0.784578
B1.1_TRINITY_DN1888_c3_g1_i3.p1									2286300	0	0
B1.1_TRINITY_DN18887_c0_g1_i1.p1	K00667	FAS2; fatty acid synthase subunit alpha, fungi type [EC:2.3.1.86]	K09100 Metabolism	K09103 Lipid metabolism	K00061 Fatty acid biosynthesis [PATH:ko00061]			elong_cond_enzymes	21383000	0	0
B1.1_TRINITY_DN18896_c0_g1_i1.p1								PKS	83753000	0	0
B1.1_TRINITY_DN189_c0_g1_i1.p1	K01265	map; methionyl aminopeptidase [EC:3.4.11.18]	K09180 Brite Hierarchies	K09181 Protein families: metabolism	K01002 Peptidases and inhibitors [BR:ko01002]			PTZ00053	324140000	51663200	0.159385
B1.1_TRINITY_DN189_c0_g1_i4.p1	K01265	map; methionyl aminopeptidase [EC:3.4.11.18]	K09180 Brite Hierarchies	K09181 Protein families: metabolism	K01002 Peptidases and inhibitors [BR:ko01002]			PTZ00053	62809000	8051300	0.128187
B1.1_TRINITY_DN189_c0_g2_i1.p1								KH-I_Vigilin_rpt4	1354550000	27247600	0.0201156
B1.1_TRINITY_DN1890_c1_g1_i1.p1	K17795	TIM17; mitochondrial import inner membrane translocase subunit TIM17	K09180 Brite Hierarchies	K09182 Protein families: genetic information processing	K03029 Mitochondrial biogenesis [BR:ko03029]			3a0801so1tim17	22743700	0	0
B1.1_TRINITY_DN18900_c0_g2_i1.p1	K01412	PMPCA, MAS2; mitochondrial-processing peptidase subunit alpha [EC:3.4.24.64]	K09180 Brite Hierarchies	K09181 Protein families: metabolism	K01002 Peptidases and inhibitors [BR:ko01002]			PqqL	111678000	1777600	0.0159172
B1.1_TRINITY_DN18907_c0_g1_i3.p1	K01897	ACSL, fadD; long-chain acyl-CoA synthetase [EC:6.2.1.3]	K09100 Metabolism	K09103 Lipid metabolism	K00061 Fatty acid biosynthesis [PATH:ko00061]			LC-FACS_euk	69301000	0	0
B1.1_TRINITY_DN1892_c1_g1_i3.p1	K12392	AP1B1; AP-1 complex subunit beta-1	K09140 Cellular Processes	K09141 Transport and catabolism	K04142 Lysosome [PATH:ko04142]			COG5096	48127000	0	0
B1.1_TRINITY_DN1892_c1_g1_i7.p1	K12392	AP1B1; AP-1 complex subunit beta-1	K09140 Cellular Processes	K09141 Transport and catabolism	K04142 Lysosome [PATH:ko04142]			PTZ00429	20685200	0	0
B1.1_TRINITY_DN18924_c0_g1_i2.p1	K14832	MAK21, NOC1, CEBPZ; ribosome biogenesis protein MAK21	K09180 Brite Hierarchies	K09182 Protein families: genetic information processing	K03009 Ribosome biogenesis [BR:ko03009]			COG5593	8886000	0	0
B1.1_TRINITY_DN1893_c0_g2_i1.p1	K01102	PDP; pyruvate dehydrogenase phosphatase [EC:3.1.3.43]	K09180 Brite Hierarchies	K09181 Protein families: metabolism	K01009 Protein phosphatases and associated proteins [BR:ko01009]			PP2Cc	689400000	22876900	0.0331838
B1.1_TRINITY_DN1894_c1_g1_i1.p1								Glyco_hydro_48	14751000	1196190000	81.0921
B1.1_TRINITY_DN18959_c0_g1_i7.p1	K03006	RPB1, POLR2A; DNA-directed RNA polymerase II subunit RPB1 [EC:2.7.7.6]	K09120 Genetic Information Processing	K09121 Transcription	K03020 RNA polymerase [PATH:ko03020]			RNAP_II_Rpb1_C	6249400	0	0
B1.1_TRINITY_DN18959_c0_g2_i1.p1	K03006	RPB1, POLR2A; DNA-directed RNA polymerase II subunit RPB1 [EC:2.7.7.6]	K09120 Genetic Information Processing	K09121 Transcription	K03020 RNA polymerase [PATH:ko03020]			RNAP_II_Rpb1_C	9813400	0	0
B1.1_TRINITY_DN1897_c0_g3_i4.p1	K09553	STIP1; stress-induced-phosphoprotein 1	K09160 Human Diseases	K09164 Neurodegenerative disease				PLN03088	343660000	373710000	1.08744
B1.1_TRINITY_DN18980_c0_g1_i1.p1	K08516	YKT6; synaptobrevin homolog YKT6	K09120 Genetic Information Processing	K09123 Folding, sorting and degradation	K04130 SNARE interactions in vesicular transport [PATH:ko04130]			SNC1	39337000	2246270	0.0571032
B1.1_TRINITY_DN1899_c0_g1_i3.p1	K00728	POMT, pmt; dolichyl-phosphate-mannose-protein mannosyltransferase [EC:2.4.1.109]	K09100 Metabolism	K09107 Glycan biosynthesis and metabolism	K00515 Mannose type O-glycan biosynthesis [PATH:ko00515]			PMT1	1103200	0	0
B1.1_TRINITY_DN190_c2_g1_i1.p1	K01869	LARS, leuS; leucyl-tRNA synthetase [EC:6.1.1.4]	K09120 Genetic Information Processing	K09122 Translation	K00970 Aminoacyl-tRNA biosynthesis [PATH:ko00970]			PLN02959	2027130000	95138000	0.0469324
B1.1_TRINITY_DN19069_c0_g2_i4.p1	K11887	PAAF1, RPN14; proteasomal ATPase-associated factor 1	K09180 Brite Hierarchies	K09182 Protein families: genetic information processing	K03051 Proteasome [BR:ko03051]			WD40	4531100	18329300	4.04522
B1.1_TRINITY_DN19072_c0_g1_i1.p1	K05658	ABCB1, CD243; ATP-binding cassette, subfamily B (MDR/TAP), member 1 [EC:7.6.2.2]	K09130 Environmental Information Processing	K09131 Membrane transport	K02010 ABC transporters [PATH:ko02010]			MdlB	9422400	0	0
B1.1_TRINITY_DN19103_c0_g1_i1.p1	K05349	bglX; beta-glucosidase [EC:3.2.1.21]	K09100 Metabolism	K09101 Carbohydrate metabolism	K00500 Starch and sucrose metabolism [PATH:ko00500]			Glyco_hydro_3_C	3236600	34481000	10.6535
B1.1_TRINITY_DN19106_c0_g1_i3.p1	K03039	PSMD13, RPN9; 26S proteasome regulatory subunit N9	K09120 Genetic Information Processing	K09123 Folding, sorting and degradation	K03050 Proteasome [PATH:ko03050]				532570000	9763200	0.0183322
B1.1_TRINITY_DN1913_c0_g1_i8.p1	K06944	K06944; uncharacterized protein	K09180 Brite Hierarchies	K09194 Poorly characterized	K99997 Function unknown			Rbg1	23364000	0	0
B1.1_TRINITY_DN1913_c4_g1_i1.p1									10417200	8185900	0.785806
B1.1_TRINITY_DN1916_c0_g1_i2.p1	K05756	ARPC3; actin related protein 2/3 complex, subunit 3	K09140 Cellular Processes	K09141 Transport and catabolism	K04144 Endocytosis [PATH:ko04144]			P21-Arc	96088000	8557700	0.0890611
B1.1_TRINITY_DN19172_c0_g1_i2.p1	K00278	nadB; L-aspartate oxidase [EC:1.4.3.16]	K09100 Metabolism	K09105 Amino acid metabolism	K00250 Alanine, aspartate and glutamate metabolism [PATH:ko00250]			PRK09077	272870000	115790000	0.424341
B1.1_TRINITY_DN19172_c0_g2_i3.p1	K00278	nadB; L-aspartate oxidase [EC:1.4.3.16]	K09100 Metabolism	K09105 Amino acid metabolism	K00250 Alanine, aspartate and glutamate metabolism [PATH:ko00250]			PRK09077	1455090000	623360000	0.4284
B1.1_TRINITY_DN192_c0_g1_i3.p1									0	31165000
B1.1_TRINITY_DN192_c1_g1_i3.p1	K06875	PDCD5, TFAR19; programmed cell death protein 5	K09180 Brite Hierarchies	K09193 Unclassified: signaling and cellular processes	K99995 Signaling proteins			dsDNA_bind	38354000	307210000	8.00986
B1.1_TRINITY_DN1920_c0_g1_i4.p1	K20463	OSBPL3_6_7, ORP3_6_7; oxysterol-binding protein-related protein 3/6/7	K09180 Brite Hierarchies	K09182 Protein families: genetic information processing	K04131 Membrane trafficking [BR:ko04131]			Oxysterol_BP	16982700	0	0
B1.1_TRINITY_DN19200_c0_g1_i2.p1								STKc_MAP3K-like	0	11609000
B1.1_TRINITY_DN1922_c0_g1_i4.p1	K08341	GABARAP, ATG8, LC3; GABA(A) receptor-associated protein	K09130 Environmental Information Processing	K09132 Signal transduction	K04068 FoxO signaling pathway [PATH:ko04068]			Ubl_ATG8	1275900	17601000	13.795
B1.1_TRINITY_DN1922_c1_g1_i1.p1									4603900	0	0
B1.1_TRINITY_DN1923_c0_g1_i1.p1									2964700	2086900	0.703916
B1.1_TRINITY_DN1924_c1_g1_i1.p1									6212000	0	0
B1.1_TRINITY_DN19266_c0_g1_i2.p1	K01613	psd, PISD; phosphatidylserine decarboxylase [EC:4.1.1.65]	K09100 Metabolism	K09103 Lipid metabolism	K00564 Glycerophospholipid metabolism [PATH:ko00564]			PLN02938	22841000	0	0
B1.1_TRINITY_DN19278_c0_g1_i1.p1									8098900	19935000	2.46145
B1.1_TRINITY_DN1928_c1_g2_i1.p1									0	7783300
B1.1_TRINITY_DN1929_c0_g1_i2.p1	K15356	VRG4, GONST1; GDP-mannose transporter	K09180 Brite Hierarchies	K09183 Protein families: signaling and cellular processes	K02000 Transporters [BR:ko02000]			VRG4	8385500	0	0
B1.1_TRINITY_DN19301_c0_g1_i1.p1								GST_N_Sigma_like	1698340000	5.2119e+09	3.06882
B1.1_TRINITY_DN1935_c0_g1_i4.p1	K14016	UFD1; ubiquitin fusion degradation protein 1	K09120 Genetic Information Processing	K09123 Folding, sorting and degradation	K04141 Protein processing in endoplasmic reticulum [PATH:ko04141]			UFD1	14387400	1561600	0.108539
B1.1_TRINITY_DN19369_c1_g1_i1.p1	K16369	CHO2; phosphatidylethanolamine N-methyltransferase [EC:2.1.1.17]	K09100 Metabolism	K09103 Lipid metabolism	K00564 Glycerophospholipid metabolism [PATH:ko00564]			PEMT	12142400	0	0
B1.1_TRINITY_DN19398_c1_g2_i1.p1									0	3540500
B1.1_TRINITY_DN1940_c0_g2_i5.p1								HAD_Pase	67676000	659570000	9.746
B1.1_TRINITY_DN1940_c1_g4_i5.p1	K11836	USP5_13, UBP14; ubiquitin carboxyl-terminal hydrolase 5/13 [EC:3.4.19.12]	K09180 Brite Hierarchies	K09181 Protein families: metabolism	K01002 Peptidases and inhibitors [BR:ko01002]			zf-UBP_var	8683700	0	0
B1.1_TRINITY_DN19477_c1_g1_i1.p1									4904400	0	0
B1.1_TRINITY_DN19481_c0_g1_i1.p1									1658100	0	0
B1.1_TRINITY_DN195_c0_g1_i13.p1	K09500	CCT8; T-complex protein 1 subunit theta	K09180 Brite Hierarchies	K09182 Protein families: genetic information processing	K03110 Chaperones and folding catalysts [BR:ko03110]			chap_CCT_theta	890140000	34949100	0.0392625
B1.1_TRINITY_DN1950_c0_g1_i3.p1	K19868	NME8, TXNDC3; thioredoxin domain-containing protein 3	K09180 Brite Hierarchies	K09182 Protein families: genetic information processing	K03036 Chromosome and associated proteins [BR:ko03036]			NDK	244920000	73418000	0.299763
B1.1_TRINITY_DN1951_c0_g3_i1.p1	K01181	E3.2.1.8, xynA; endo-1,4-beta-xylanase [EC:3.2.1.8]	K09180 Brite Hierarchies	K09191 Unclassified: metabolism	K99980 Enzymes with EC numbers		GH10	Glyco_10	80260000	1598680000	19.9188
B1.1_TRINITY_DN19518_c0_g1_i1.p1									38663000	1714700	0.0443499
B1.1_TRINITY_DN19525_c0_g1_i2.p1									0	7166800
B1.1_TRINITY_DN19537_c0_g1_i1.p1									0	662720
B1.1_TRINITY_DN19540_c0_g1_i1.p1									0	15793000
B1.1_TRINITY_DN1957_c1_g1_i1.p1	K11886	ECM29; proteasome component ECM29	K09180 Brite Hierarchies	K09182 Protein families: genetic information processing	K03051 Proteasome [BR:ko03051]				3402100	0	0
B1.1_TRINITY_DN19577_c0_g1_i1.p1	K10357	MYO5; myosin V	K09160 Human Diseases	K09171 Infectious disease: bacterial	K05130 Pathogenic Escherichia coli infection [PATH:ko05130]			MYSc_Myo5	21872000	0	0
B1.1_TRINITY_DN1960_c0_g1_i3.p1								Vinculin	0	1634100
B1.1_TRINITY_DN19605_c0_g1_i1.p1									5124600	209694000	40.9191
B1.1_TRINITY_DN19613_c0_g1_i1.p1						CBM_10			53783000	442671000	8.23069
B1.1_TRINITY_DN19617_c0_g1_i2.p1	K03002	RPA2, POLR1B; DNA-directed RNA polymerase I subunit RPA2 [EC:2.7.7.6]	K09120 Genetic Information Processing	K09121 Transcription	K03020 RNA polymerase [PATH:ko03020]			RNA_pol_B_RPB2	43671000	496940	0.0113792
B1.1_TRINITY_DN1962_c1_g1_i5.p1	K12829	SF3B2, SAP145, CUS1; splicing factor 3B subunit 2	K09120 Genetic Information Processing	K09121 Transcription	K03040 Spliceosome [PATH:ko03040]				1756400	0	0
B1.1_TRINITY_DN1965_c0_g1_i4.p1	K13830	ARO1; pentafunctional AROM polypeptide [EC:4.2.3.4 4.2.1.10 1.1.1.25 2.7.1.71 2.5.1.19]	K09100 Metabolism	K09105 Amino acid metabolism	K00400 Phenylalanine, tyrosine and tryptophan biosynthesis [PATH:ko00400]			DHQS	93608000	46745000	0.49937
B1.1_TRINITY_DN1965_c0_g1_i5.p2	K13830	ARO1; pentafunctional AROM polypeptide [EC:4.2.3.4 4.2.1.10 1.1.1.25 2.7.1.71 2.5.1.19]	K09100 Metabolism	K09105 Amino acid metabolism	K00400 Phenylalanine, tyrosine and tryptophan biosynthesis [PATH:ko00400]			EPSP_synthase	55353000	27304000	0.49327
B1.1_TRINITY_DN1966_c0_g1_i2.p1									3483500	38584000	11.0762
B1.1_TRINITY_DN1966_c1_g2_i1.p1									1234400	0	0
B1.1_TRINITY_DN1966_c1_g3_i1.p1	K01653	E2.2.1.6S, ilvH, ilvN; acetolactate synthase I/III small subunit [EC:2.2.1.6]	K09100 Metabolism	K09101 Carbohydrate metabolism	K00650 Butanoate metabolism [PATH:ko00650]			acolac_sm	1363750000	92752000	0.0680125
B1.1_TRINITY_DN1968_c1_g1_i1.p1	K00656	E2.3.1.54, pflD; formate C-acetyltransferase [EC:2.3.1.54]	K09100 Metabolism	K09101 Carbohydrate metabolism	K00620 Pyruvate metabolism [PATH:ko00620]			PFL1	4372600000	1.73504e+09	0.396798
B1.1_TRINITY_DN1969_c1_g1_i1.p1									0	5475300
B1.1_TRINITY_DN19695_c0_g1_i1.p1	K05727	DOCK3; dedicator of cytokinesis protein 3	K09180 Brite Hierarchies	K09182 Protein families: genetic information processing	K04131 Membrane trafficking [BR:ko04131]			DHR2_DOCK	5336100	0	0
B1.1_TRINITY_DN19703_c0_g2_i2.p1	K02966	RP-S19e, RPS19; small subunit ribosomal protein S19e	K09120 Genetic Information Processing	K09122 Translation	K03010 Ribosome [PATH:ko03010]			Ribosomal_S19e	2489400000	210550000	0.0845786
B1.1_TRINITY_DN19718_c0_g1_i4.p1	K01885	EARS, gltX; glutamyl-tRNA synthetase [EC:6.1.1.17]	K09100 Metabolism	K09108 Metabolism of cofactors and vitamins	K00860 Porphyrin and chlorophyll metabolism [PATH:ko00860]			PLN02907	981810000	35140600	0.0357917
B1.1_TRINITY_DN1974_c0_g1_i2.p2									1848600	0	0
B1.1_TRINITY_DN1976_c0_g1_i6.p1	K09496	CCT4; T-complex protein 1 subunit delta	K09180 Brite Hierarchies	K09182 Protein families: genetic information processing	K03110 Chaperones and folding catalysts [BR:ko03110]			TCP1_delta	42290000	0	0
B1.1_TRINITY_DN1976_c0_g2_i6.p1	K09496	CCT4; T-complex protein 1 subunit delta	K09180 Brite Hierarchies	K09182 Protein families: genetic information processing	K03110 Chaperones and folding catalysts [BR:ko03110]			TCP1_delta	627300000	22278500	0.0355149
B1.1_TRINITY_DN198_c0_g1_i1.p1									12222800	0	0
B1.1_TRINITY_DN1980_c0_g1_i7.p1	K01897	ACSL, fadD; long-chain acyl-CoA synthetase [EC:6.2.1.3]	K09100 Metabolism	K09103 Lipid metabolism	K00061 Fatty acid biosynthesis [PATH:ko00061]			LC-FACS_euk	10258800	0	0
B1.1_TRINITY_DN1981_c1_g1_i1.p1								M13	9417100	5260600	0.558622
B1.1_TRINITY_DN1982_c0_g1_i3.p1	K23337	MKLN1; muskelin	K09180 Brite Hierarchies	K09182 Protein families: genetic information processing	K04121 Ubiquitin system [BR:ko04121]				72236000	0	0
B1.1_TRINITY_DN1982_c2_g1_i1.p1									6718700	0	0
B1.1_TRINITY_DN19856_c0_g1_i3.p1	K03768	PPIB, ppiB; peptidyl-prolyl cis-trans isomerase B (cyclophilin B) [EC:5.2.1.8]	K09180 Brite Hierarchies	K09182 Protein families: genetic information processing	K03110 Chaperones and folding catalysts [BR:ko03110]			cyclophilin_ABH_like	801020000	1227960000	1.533
B1.1_TRINITY_DN19879_c0_g1_i6.p1								fCBD	0	410390000
B1.1_TRINITY_DN1988_c0_g1_i7.p1						CBM_10		DPBB_GH45_endoglucanase	1515300	1.61051e+09	1062.83
B1.1_TRINITY_DN1991_c0_g1_i5.p1	K05754	ARPC5; actin related protein 2/3 complex, subunit 5	K09140 Cellular Processes	K09141 Transport and catabolism	K04144 Endocytosis [PATH:ko04144]			P16-Arc	104872000	12053900	0.114939
B1.1_TRINITY_DN19916_c0_g1_i1.p1	K10755	RFC2_4; replication factor C subunit 2/4	K09120 Genetic Information Processing	K09124 Replication and repair	K03030 DNA replication [PATH:ko03030]			rfc	8684300	0	0
B1.1_TRINITY_DN1992_c0_g2_i1.p1									0	6869600
B1.1_TRINITY_DN19926_c0_g1_i1.p1									118153000	2810900	0.0237903
B1.1_TRINITY_DN1993_c1_g1_i2.p1									26948000	2292300	0.0850638
B1.1_TRINITY_DN1993_c2_g1_i1.p1	K01530	E7.6.2.1; phospholipid-translocating ATPase [EC:7.6.2.1]	K09180 Brite Hierarchies	K09191 Unclassified: metabolism	K99980 Enzymes with EC numbers			P-type_ATPase_APLT_Dnf-like	7783900	0	0
B1.1_TRINITY_DN1997_c0_g1_i1.p1									0	2046300
B1.1_TRINITY_DN1997_c1_g1_i4.p1									45766000	0	0
B1.1_TRINITY_DN1997_c1_g1_i7.p1									55419000	0	0
B1.1_TRINITY_DN19977_c0_g1_i2.p1									2527800	0	0
B1.1_TRINITY_DN1998_c2_g1_i1.p1									6404000	0	0
B1.1_TRINITY_DN20_c0_g1_i3.p1								SET	211950000	0	0
B1.1_TRINITY_DN200_c0_g1_i4.p1	K00618	ARG2; amino-acid N-acetyltransferase [EC:2.3.1.1]	K09100 Metabolism	K09105 Amino acid metabolism	K00220 Arginine biosynthesis [PATH:ko00220]			NAT	5295100	0	0
B1.1_TRINITY_DN2001_c0_g1_i2.p1	K05349	bglX; beta-glucosidase [EC:3.2.1.21]	K09100 Metabolism	K09101 Carbohydrate metabolism	K00500 Starch and sucrose metabolism [PATH:ko00500]		GH3	BglX	30042000	3.4243e+09	113.984
B1.1_TRINITY_DN2001_c1_g1_i1.p1						CBM_10			11325700	648918000	57.2961
B1.1_TRINITY_DN2001_c1_g2_i7.p1						CBM_10		CotH	3029400	0	0
B1.1_TRINITY_DN2002_c0_g2_i1.p1									139261000	0	0
B1.1_TRINITY_DN2004_c0_g2_i3.p1									16981000	131090000	7.7198
B1.1_TRINITY_DN2006_c0_g1_i3.p1	K01728	pel; pectate lyase [EC:4.2.2.2]	K09100 Metabolism	K09101 Carbohydrate metabolism	K00040 Pentose and glucuronate interconversions [PATH:ko00040]		PL1_7	Amb_all	0	326960000
B1.1_TRINITY_DN2011_c0_g1_i1.p1	K00850	pfkA, PFK; 6-phosphofructokinase 1 [EC:2.7.1.11]	K09100 Metabolism	K09101 Carbohydrate metabolism	K00010 Glycolysis / Gluconeogenesis [PATH:ko00010]			PRK06830	24302100	1239800	0.0510162
B1.1_TRINITY_DN2011_c1_g1_i3.p1	K03097	CSNK2A; casein kinase II subunit alpha [EC:2.7.11.1]	K09120 Genetic Information Processing	K09122 Translation	K03008 Ribosome biogenesis in eukaryotes [PATH:ko03008]				3608900	0	0
B1.1_TRINITY_DN2016_c0_g1_i8.p1	K13617	PPME1; protein phosphatase methylesterase 1 [EC:3.1.1.89]	K09180 Brite Hierarchies	K09181 Protein families: metabolism	K01002 Peptidases and inhibitors [BR:ko01002]				69661000	23079000	0.331304
B1.1_TRINITY_DN20161_c0_g1_i1.p1								Glyco_hydro_48	0	37872000
B1.1_TRINITY_DN2018_c1_g1_i2.p1									15622600	10243800	0.655704
B1.1_TRINITY_DN202_c0_g1_i2.p1									768250	0	0
B1.1_TRINITY_DN202_c1_g1_i1.p1									22707600	3557200	0.156652
B1.1_TRINITY_DN2022_c0_g1_i2.p1	K15633	gpmI; 2,3-bisphosphoglycerate-independent phosphoglycerate mutase [EC:5.4.2.12]	K09100 Metabolism	K09101 Carbohydrate metabolism	K00010 Glycolysis / Gluconeogenesis [PATH:ko00010]			PRK05434	2351860000	79238000	0.0336916
B1.1_TRINITY_DN2022_c0_g2_i1.p1	K15633	gpmI; 2,3-bisphosphoglycerate-independent phosphoglycerate mutase [EC:5.4.2.12]	K09100 Metabolism	K09101 Carbohydrate metabolism	K00010 Glycolysis / Gluconeogenesis [PATH:ko00010]			PRK05434	1340210000	90254000	0.0673432
B1.1_TRINITY_DN2022_c0_g3_i1.p1	K15633	gpmI; 2,3-bisphosphoglycerate-independent phosphoglycerate mutase [EC:5.4.2.12]	K09100 Metabolism	K09101 Carbohydrate metabolism	K00010 Glycolysis / Gluconeogenesis [PATH:ko00010]			PRK05434	3.7599e+09	2854125000	0.759096
B1.1_TRINITY_DN2022_c2_g1_i3.p1								AAT_like	343990000	389050000	1.13099
B1.1_TRINITY_DN2024_c0_g1_i2.p1	K04646	CLTC; clathrin heavy chain	K09140 Cellular Processes	K09141 Transport and catabolism	K04144 Endocytosis [PATH:ko04144]			Clathrin_H_link	245930000	18398300	0.0748111
B1.1_TRINITY_DN2024_c0_g1_i4.p1	K04646	CLTC; clathrin heavy chain	K09140 Cellular Processes	K09141 Transport and catabolism	K04144 Endocytosis [PATH:ko04144]			Clathrin_H_link	368860000	22003000	0.0596514
B1.1_TRINITY_DN203_c0_g1_i3.p1								Synaptobrevin	31004000	3918400	0.126384
B1.1_TRINITY_DN20343_c0_g1_i3.p1								GH16_laminarinase_like	0	284680000
B1.1_TRINITY_DN2035_c0_g1_i1.p1	K00789	metK, MAT; S-adenosylmethionine synthetase [EC:2.5.1.6]	K09100 Metabolism	K09105 Amino acid metabolism	K00270 Cysteine and methionine metabolism [PATH:ko00270]			PTZ00104	3.2776e+09	959150000	0.292638
B1.1_TRINITY_DN2036_c0_g1_i2.p1	K07126	K07126; uncharacterized protein	K09180 Brite Hierarchies	K09194 Poorly characterized	K99997 Function unknown			TPR	0	2121500
B1.1_TRINITY_DN20361_c0_g1_i3.p1	K12957	ahr; alcohol/geraniol dehydrogenase (NADP+) [EC:1.1.1.2 1.1.1.183]	K09100 Metabolism	K09101 Carbohydrate metabolism	K00010 Glycolysis / Gluconeogenesis [PATH:ko00010]			CAD1	3.0678e+09	272559000	0.0888451
B1.1_TRINITY_DN2037_c0_g1_i2.p1	K25457							DD_CrRSP11-like	3374000	7233900	2.14401
B1.1_TRINITY_DN2037_c1_g1_i3.p1	K11086	SNRPB, SMB; small nuclear ribonucleoprotein B and B'	K09120 Genetic Information Processing	K09121 Transcription	K03040 Spliceosome [PATH:ko03040]			Sm_B	18900600	2797400	0.148006
B1.1_TRINITY_DN2038_c1_g6_i1.p1									12499000	0	0
B1.1_TRINITY_DN2038_c2_g1_i2.p1	K17046	DEK; protein DEK	K09180 Brite Hierarchies	K09182 Protein families: genetic information processing	K03036 Chromosome and associated proteins [BR:ko03036]				46420000	27179200	0.585506
B1.1_TRINITY_DN20380_c0_g1_i1.p1									9120100	0	0
B1.1_TRINITY_DN2039_c0_g1_i2.p1									126725000	186172300	1.4691
B1.1_TRINITY_DN2039_c1_g1_i1.p1								BaeB-like_MBL-fold	13942500	0	0
B1.1_TRINITY_DN2046_c1_g1_i4.p1	K00011	AKR1B; aldehyde reductase [EC:1.1.1.21]	K09100 Metabolism	K09101 Carbohydrate metabolism	K00040 Pentose and glucuronate interconversions [PATH:ko00040]			AKR_AKR1-5-like	0	814180
B1.1_TRINITY_DN2046_c1_g1_i6.p1	K00011	AKR1B; aldehyde reductase [EC:1.1.1.21]	K09100 Metabolism	K09101 Carbohydrate metabolism	K00040 Pentose and glucuronate interconversions [PATH:ko00040]			AKR_AKR3G1	917400000	5.832e+09	6.3571
B1.1_TRINITY_DN2047_c0_g2_i1.p1								EH	4759800	0	0
B1.1_TRINITY_DN2052_c0_g2_i2.p1	K04759	feoB; ferrous iron transport protein B	K09180 Brite Hierarchies	K09183 Protein families: signaling and cellular processes	K02000 Transporters [BR:ko02000]			FeoB	62020000	0	0
B1.1_TRINITY_DN2056_c0_g2_i5.p1	K14015	NPLOC4, NPL4; nuclear protein localization protein 4	K09120 Genetic Information Processing	K09123 Folding, sorting and degradation	K04141 Protein processing in endoplasmic reticulum [PATH:ko04141]			NPL4	43532000	0	0
B1.1_TRINITY_DN2057_c0_g1_i8.p1	K00850	pfkA, PFK; 6-phosphofructokinase 1 [EC:2.7.1.11]	K09100 Metabolism	K09101 Carbohydrate metabolism	K00010 Glycolysis / Gluconeogenesis [PATH:ko00010]			6PF1K_euk	214046000	6659400	0.031112
B1.1_TRINITY_DN20582_c0_g1_i6.p1	K05349	bglX; beta-glucosidase [EC:3.2.1.21]	K09100 Metabolism	K09101 Carbohydrate metabolism	K00500 Starch and sucrose metabolism [PATH:ko00500]			PRK15098	0	3005100
B1.1_TRINITY_DN206_c0_g1_i1.p1	K00053	ilvC; ketol-acid reductoisomerase [EC:1.1.1.86]	K09100 Metabolism	K09105 Amino acid metabolism	K00290 Valine, leucine and isoleucine biosynthesis [PATH:ko00290]			ilvC	23161000000	57115000000	2.466
B1.1_TRINITY_DN206_c0_g1_i4.p1	K00053	ilvC; ketol-acid reductoisomerase [EC:1.1.1.86]	K09100 Metabolism	K09105 Amino acid metabolism	K00290 Valine, leucine and isoleucine biosynthesis [PATH:ko00290]			ilvC	1.98694e+09	4.5063e+09	2.26796
B1.1_TRINITY_DN206_c0_g1_i5.p1	K00053	ilvC; ketol-acid reductoisomerase [EC:1.1.1.86]	K09100 Metabolism	K09105 Amino acid metabolism	K00290 Valine, leucine and isoleucine biosynthesis [PATH:ko00290]			ilvC	590690000	1784950000	3.02181
B1.1_TRINITY_DN20609_c0_g1_i1.p1									45767000	57857000	1.26416
B1.1_TRINITY_DN20618_c0_g1_i2.p1	K14018	PLAA, DOA1, UFD3; phospholipase A-2-activating protein	K09120 Genetic Information Processing	K09123 Folding, sorting and degradation	K04141 Protein processing in endoplasmic reticulum [PATH:ko04141]			WD40	0	1835900
B1.1_TRINITY_DN20621_c1_g1_i1.p1									2495300	0	0
B1.1_TRINITY_DN20621_c2_g1_i1.p1									10076200	2261800	0.22447
B1.1_TRINITY_DN2067_c0_g1_i4.p1									244860000	15747800	0.0643135
B1.1_TRINITY_DN20671_c0_g1_i1.p1	K17086	TM9SF2_4; transmembrane 9 superfamily member 2/4	K09180 Brite Hierarchies	K09183 Protein families: signaling and cellular processes	K04147 Exosome [BR:ko04147]				2033600	0	0
B1.1_TRINITY_DN20672_c0_g2_i2.p1	K15918	GLYK; D-glycerate 3-kinase [EC:2.7.1.31]	K09100 Metabolism	K09101 Carbohydrate metabolism	K00630 Glyoxylate and dicarboxylate metabolism [PATH:ko00630]			PLN02796	6007800	1013600	0.168714
B1.1_TRINITY_DN20690_c3_g1_i1.p1	K12856	PRPF8, PRP8; pre-mRNA-processing factor 8	K09120 Genetic Information Processing	K09121 Transcription	K03040 Spliceosome [PATH:ko03040]			PRP8	9344100	0	0
B1.1_TRINITY_DN2074_c0_g1_i1.p1									14206600	0	0
B1.1_TRINITY_DN2075_c0_g1_i1.p1	K11251	H2A; histone H2A	K09140 Cellular Processes	K09143 Cell growth and death	K04217 Necroptosis [PATH:ko04217]			PTZ00017	1347480000	15541700	0.0115339
B1.1_TRINITY_DN2075_c0_g1_i3.p1	K11251	H2A; histone H2A	K09140 Cellular Processes	K09143 Cell growth and death	K04217 Necroptosis [PATH:ko04217]			PTZ00017	112040000	0	0
B1.1_TRINITY_DN2075_c2_g1_i1.p1									30613000	2062700	0.0673799
B1.1_TRINITY_DN2077_c8_g1_i1.p1									0	28690900
B1.1_TRINITY_DN2078_c0_g1_i2.p1	K04802	PCNA; proliferating cell nuclear antigen	K09120 Genetic Information Processing	K09124 Replication and repair	K03030 DNA replication [PATH:ko03030]			PLN00057	260950000	75478000	0.289243
B1.1_TRINITY_DN2078_c1_g1_i1.p1									9053600	6249300	0.690256
B1.1_TRINITY_DN2078_c1_g2_i2.p1									202777000	987060	0.00486771
B1.1_TRINITY_DN20783_c0_g1_i1.p1	K05687	PARK7; protein DJ-1 [EC:3.5.1.124]	K09160 Human Diseases	K09164 Neurodegenerative disease				not_thiJ	233485000	2.69889e+09	11.5592
B1.1_TRINITY_DN20799_c0_g2_i1.p1								PLDc_PGS1_euk_1	1966900	0	0
B1.1_TRINITY_DN2082_c0_g1_i1.p1									14589700	73371000	5.02896
B1.1_TRINITY_DN20828_c0_g1_i2.p1	K22063	ISCA1; iron-sulfur cluster assembly 1	K09180 Brite Hierarchies	K09182 Protein families: genetic information processing	K03029 Mitochondrial biogenesis [BR:ko03029]			IscA	72753000	32187000	0.442415
B1.1_TRINITY_DN20897_c0_g1_i4.p1	K14843	PES1, NOP7; pescadillo	K09180 Brite Hierarchies	K09182 Protein families: genetic information processing	K03009 Ribosome biogenesis [BR:ko03009]			NOP7	10522700	0	0
B1.1_TRINITY_DN209_c0_g1_i2.p1	K01808	rpiB; ribose 5-phosphate isomerase B [EC:5.3.1.6]	K09100 Metabolism	K09101 Carbohydrate metabolism	K00030 Pentose phosphate pathway [PATH:ko00030]			LacAB_rpiB	364560000	513820000	1.40943
B1.1_TRINITY_DN20902_c0_g2_i1.p1	K09602	OTUB1; ubiquitin thioesterase protein OTUB1 [EC:3.4.19.12]	K09180 Brite Hierarchies	K09181 Protein families: metabolism	K01002 Peptidases and inhibitors [BR:ko01002]			Otubain_C65	0	9340400
B1.1_TRINITY_DN2091_c1_g1_i7.p1	K02975	RP-S25e, RPS25; small subunit ribosomal protein S25e	K09120 Genetic Information Processing	K09122 Translation	K03010 Ribosome [PATH:ko03010]			Ribosomal_S25	965330000	79759000	0.0826236
B1.1_TRINITY_DN2092_c3_g1_i1.p1	K02891	RP-L22e, RPL22; large subunit ribosomal protein L22e	K09120 Genetic Information Processing	K09122 Translation	K03010 Ribosome [PATH:ko03010]			Ribosomal_L22e	902750000	108662000	0.120368
B1.1_TRINITY_DN20936_c0_g1_i1.p1	K03018	RPC1, POLR3A; DNA-directed RNA polymerase III subunit RPC1 [EC:2.7.7.6]	K09120 Genetic Information Processing	K09121 Transcription	K03020 RNA polymerase [PATH:ko03020]			RNAP_III_Rpc1_C	1203740	0	0
B1.1_TRINITY_DN2094_c0_g1_i6.p1	K10352	MYH9s; myosin heavy chain 9/10/11/14	K09140 Cellular Processes	K09144 Cellular community - eukaryotes	K04530 Tight junction [PATH:ko04530]			MYSc_class_II	1267100	0	0
B1.1_TRINITY_DN20991_c1_g1_i1.p1								Vps35	15593500	0	0
B1.1_TRINITY_DN21_c0_g1_i1.p1	K02151	ATPeV1F, ATP6S14; V-type H+-transporting ATPase subunit F	K09100 Metabolism	K09102 Energy metabolism	K00190 Oxidative phosphorylation [PATH:ko00190]			V_ATP_synt_F	147607000	72427500	0.490678
B1.1_TRINITY_DN2100_c1_g1_i5.p1	K00804	GGPS1; geranylgeranyl diphosphate synthase, type III [EC:2.5.1.1 2.5.1.10 2.5.1.29]	K09100 Metabolism	K09109 Metabolism of terpenoids and polyketides	K00900 Terpenoid backbone biosynthesis [PATH:ko00900]			polyprenyl_synt	17396200	0	0
B1.1_TRINITY_DN2101_c1_g1_i1.p1	K04078	groES, HSPE1; chaperonin GroES	K09180 Brite Hierarchies	K09182 Protein families: genetic information processing	K03110 Chaperones and folding catalysts [BR:ko03110]			cpn10	112718000	120121700	1.06568
B1.1_TRINITY_DN2103_c0_g1_i4.p1								SRAP	0	7382500
B1.1_TRINITY_DN2105_c0_g1_i1.p1	K11275	H1_5; histone H1/5	K09180 Brite Hierarchies	K09182 Protein families: genetic information processing	K03036 Chromosome and associated proteins [BR:ko03036]			Linker_histone	85221000	0	0
B1.1_TRINITY_DN2105_c3_g2_i1.p1									9573200	38701300	4.04267
B1.1_TRINITY_DN21054_c1_g1_i1.p1	K10408	DNAH; dynein axonemal heavy chain	K09160 Human Diseases	K09164 Neurodegenerative disease				AAA_8	1651600	0	0
B1.1_TRINITY_DN2106_c0_g1_i1.p1									34554000	43348700	1.25452
B1.1_TRINITY_DN2107_c0_g1_i7.p1	K04799	FEN1, RAD2; flap endonuclease-1 [EC:3.-.-.-]	K09120 Genetic Information Processing	K09124 Replication and repair	K03030 DNA replication [PATH:ko03030]			PTZ00217	0	135900000
B1.1_TRINITY_DN21070_c0_g1_i1.p1	K09313	CUTL; homeobox protein cut-like	K09180 Brite Hierarchies	K09182 Protein families: genetic information processing	K03000 Transcription factors [BR:ko03000]			CASP_C	0	1217600
B1.1_TRINITY_DN2108_c0_g1_i2.p1	K25628								806770	0	0
B1.1_TRINITY_DN21181_c0_g1_i1.p2	K02940	RP-L9e, RPL9; large subunit ribosomal protein L9e	K09120 Genetic Information Processing	K09122 Translation	K03010 Ribosome [PATH:ko03010]			PTZ00027	2.9203e+09	112243600	0.0384356
B1.1_TRINITY_DN2120_c0_g1_i4.p1	K10739	RFA2, RPA2; replication factor A2	K09120 Genetic Information Processing	K09124 Replication and repair	K03030 DNA replication [PATH:ko03030]			RFA2	39959000	3081800	0.0771241
B1.1_TRINITY_DN21206_c0_g1_i1.p1								Pectate_lyase	0	9188800
B1.1_TRINITY_DN2122_c2_g1_i1.p1									7177700	3139900	0.437452
B1.1_TRINITY_DN21236_c0_g1_i1.p1	K10357	MYO5; myosin V	K09160 Human Diseases	K09171 Infectious disease: bacterial	K05130 Pathogenic Escherichia coli infection [PATH:ko05130]			COG5022	107482000	0	0
B1.1_TRINITY_DN2125_c1_g1_i3.p1									28929000	0	0
B1.1_TRINITY_DN2126_c3_g1_i1.p1									41283000	3373500	0.0817164
B1.1_TRINITY_DN2129_c0_g1_i1.p1									8070800	104248000	12.9167
B1.1_TRINITY_DN2129_c0_g1_i5.p1									0	3250700
B1.1_TRINITY_DN2132_c0_g1_i1.p1	K00850	pfkA, PFK; 6-phosphofructokinase 1 [EC:2.7.1.11]	K09100 Metabolism	K09101 Carbohydrate metabolism	K00010 Glycolysis / Gluconeogenesis [PATH:ko00010]			6PF1K_euk	394520000	10252000	0.025986
B1.1_TRINITY_DN2133_c0_g2_i1.p1	K19756	RSPH4_6; radial spoke head protein 4/6	K09180 Brite Hierarchies	K09183 Protein families: signaling and cellular processes	K04812 Cytoskeleton proteins [BR:ko04812]			Radial_spoke	4556200	1602100	0.351631
B1.1_TRINITY_DN2137_c0_g1_i6.p1	K01181	E3.2.1.8, xynA; endo-1,4-beta-xylanase [EC:3.2.1.8]	K09180 Brite Hierarchies	K09191 Unclassified: metabolism	K99980 Enzymes with EC numbers	CBM_10	GH10+fungi_doc	Glyco_10	99155000	11321000000	114.175
B1.1_TRINITY_DN2137_c2_g1_i1.p1									42176000	0	0
B1.1_TRINITY_DN2138_c0_g2_i1.p1	K01620	ltaE; threonine aldolase [EC:4.1.2.48]	K09100 Metabolism	K09105 Amino acid metabolism	K00260 Glycine, serine and threonine metabolism [PATH:ko00260]			TA_like	33924000	0	0
B1.1_TRINITY_DN2139_c0_g1_i5.p1	K06972	PITRM1, PreP, CYM1; presequence protease [EC:3.4.24.-]	K09180 Brite Hierarchies	K09181 Protein families: metabolism	K01002 Peptidases and inhibitors [BR:ko01002]			M16C_assoc	141411000	55455000	0.392155
B1.1_TRINITY_DN21392_c1_g1_i4.p1									14480700	0	0
B1.1_TRINITY_DN21399_c2_g1_i1.p1									0	6420100
B1.1_TRINITY_DN214_c0_g1_i4.p1								PRK04220	25724000	0	0
B1.1_TRINITY_DN2143_c1_g1_i3.p1	K02725	PSMA1; 20S proteasome subunit alpha 6 [EC:3.4.25.1]	K09120 Genetic Information Processing	K09123 Folding, sorting and degradation	K03050 Proteasome [PATH:ko03050]			proteasome_alpha_type_1	438450000	617650000	1.40871
B1.1_TRINITY_DN21442_c0_g2_i1.p1	K01181	E3.2.1.8, xynA; endo-1,4-beta-xylanase [EC:3.2.1.8]	K09180 Brite Hierarchies	K09191 Unclassified: metabolism	K99980 Enzymes with EC numbers		GH10	Glyco_10	221896000	3121030000	14.0653
B1.1_TRINITY_DN21443_c2_g1_i1.p1									0	16316900
B1.1_TRINITY_DN2145_c2_g1_i2.p1	K02987	RP-S4e, RPS4; small subunit ribosomal protein S4e	K09120 Genetic Information Processing	K09122 Translation	K03010 Ribosome [PATH:ko03010]			PLN00036	29039000	7639200	0.263067
B1.1_TRINITY_DN2149_c1_g1_i1.p1	K00058	serA, PHGDH; D-3-phosphoglycerate dehydrogenase / 2-oxoglutarate reductase [EC:1.1.1.95 1.1.1.399]	K09100 Metabolism	K09102 Energy metabolism	K00680 Methane metabolism [PATH:ko00680]			PRK11790	48006000	0	0
B1.1_TRINITY_DN215_c1_g1_i2.p1								PYR_PYL_RCAR_like	1917500	0	0
B1.1_TRINITY_DN215_c2_g1_i2.p1	K18749	LSM14, RAP55, SCD6; protein LSM14	K09180 Brite Hierarchies	K09182 Protein families: genetic information processing	K03019 Messenger RNA biogenesis [BR:ko03019]				163940000	51137000	0.311925
B1.1_TRINITY_DN2151_c1_g1_i1.p2	K04513	RHOA; Ras homolog gene family, member A	K09130 Environmental Information Processing	K09132 Signal transduction	K04011 MAPK signaling pathway - yeast [PATH:ko04011]			RHO	19369500	0	0
B1.1_TRINITY_DN2152_c4_g1_i1.p1									33058000	15609700	0.472191
B1.1_TRINITY_DN2154_c0_g1_i1.p1									6257100	4572100	0.730706
B1.1_TRINITY_DN2155_c1_g1_i1.p1									1837070	0	0
B1.1_TRINITY_DN2157_c0_g2_i1.p1								BSP	19573800	0	0
B1.1_TRINITY_DN21583_c0_g1_i2.p1								AMPK1_CBM	117562000	5978500	0.050854
B1.1_TRINITY_DN216_c0_g1_i1.p1	K12197	CHMP1, VPS46, DID2; charged multivesicular body protein 1	K09140 Cellular Processes	K09141 Transport and catabolism	K04144 Endocytosis [PATH:ko04144]			Did4	50578000	0	0
B1.1_TRINITY_DN2163_c0_g1_i9.p1	K05236	COPA, RET1; coatomer subunit alpha	K09180 Brite Hierarchies	K09182 Protein families: genetic information processing	K04131 Membrane trafficking [BR:ko04131]			Coatomer_WDAD_alpha	171233000	0	0
B1.1_TRINITY_DN21646_c0_g1_i1.p1	K14191	DIM1; 18S rRNA (adenine1779-N6/adenine1780-N6)-dimethyltransferase [EC:2.1.1.183]	K09180 Brite Hierarchies	K09182 Protein families: genetic information processing	K03009 Ribosome biogenesis [BR:ko03009]			PTZ00338	1938050	0	0
B1.1_TRINITY_DN21655_c0_g2_i1.p1	K13192	RBM26; RNA-binding protein 26	K09180 Brite Hierarchies	K09181 Protein families: metabolism	K01009 Protein phosphatases and associated proteins [BR:ko01009]				3103700	0	0
B1.1_TRINITY_DN21675_c0_g1_i1.p1								PKS	4467100	0	0
B1.1_TRINITY_DN217_c0_g1_i3.p1	K17497	PMM; phosphomannomutase [EC:5.4.2.8]	K09100 Metabolism	K09101 Carbohydrate metabolism	K00051 Fructose and mannose metabolism [PATH:ko00051]			PTZ00174	35336000	50784000	1.43717
B1.1_TRINITY_DN21733_c1_g1_i2.p1	K11093	SNRP70; U1 small nuclear ribonucleoprotein 70kDa	K09120 Genetic Information Processing	K09121 Transcription	K03040 Spliceosome [PATH:ko03040]			U1snRNP70_N	4910000	0	0
B1.1_TRINITY_DN2178_c0_g1_i2.p1									2811100	2070200	0.736438
B1.1_TRINITY_DN2178_c1_g1_i2.p1	K19998	SCFD1, SLY1; sec1 family domain-containing protein 1	K09180 Brite Hierarchies	K09182 Protein families: genetic information processing	K04131 Membrane trafficking [BR:ko04131]			Sec1	4957300	0	0
B1.1_TRINITY_DN2178_c2_g1_i1.p1									11765500	0	0
B1.1_TRINITY_DN2183_c0_g1_i3.p1	K07203	MTOR, FRAP, TOR; serine/threonine-protein kinase mTOR [EC:2.7.11.1]	K09130 Environmental Information Processing	K09132 Signal transduction	K04012 ErbB signaling pathway [PATH:ko04012]			PIKKc_TOR	6969400	0	0
B1.1_TRINITY_DN2195_c0_g1_i5.p1	K11788	ADE5; phosphoribosylamine--glycine ligase / phosphoribosylformylglycinamidine cyclo-ligase [EC:6.3.4.13 6.3.3.1]	K09100 Metabolism	K09104 Nucleotide metabolism	K00230 Purine metabolism [PATH:ko00230]			PurM	1504970000	351785000	0.233749
B1.1_TRINITY_DN2196_c0_g4_i1.p1	K22453	TFF2; trefoil factor 2	K09180 Brite Hierarchies	K09193 Unclassified: signaling and cellular processes	K99992 Structural proteins			Trefoil	0	1291100
B1.1_TRINITY_DN2197_c0_g1_i2.p1	K17302	COPB2, SEC27; coatomer subunit beta'	K09180 Brite Hierarchies	K09182 Protein families: genetic information processing	K04131 Membrane trafficking [BR:ko04131]			Coatomer_WDAD_beta-like	0	3883900
B1.1_TRINITY_DN2199_c0_g2_i3.p1								3a0801s09	358130000	8126700	0.022692
B1.1_TRINITY_DN22_c0_g1_i3.p1									44004000	813730	0.0184922
B1.1_TRINITY_DN22_c0_g4_i3.p1									85756000	667800000	7.78721
B1.1_TRINITY_DN22_c1_g2_i1.p1									24314000	2466000	0.101423
B1.1_TRINITY_DN22031_c0_g1_i3.p1								aprataxin_related	2122300	0	0
B1.1_TRINITY_DN22038_c0_g1_i2.p1									0	8691600
B1.1_TRINITY_DN2204_c1_g1_i5.p2									20508500	0	0
B1.1_TRINITY_DN2206_c11_g1_i1.p1								Glyco_hydro_10	0	240380000
B1.1_TRINITY_DN2208_c0_g1_i3.p1								DUF1394	10246100	2719600	0.265428
B1.1_TRINITY_DN2208_c1_g1_i5.p1	K03033	PSMD3, RPN3; 26S proteasome regulatory subunit N3	K09120 Genetic Information Processing	K09123 Folding, sorting and degradation	K03050 Proteasome [PATH:ko03050]			Rpn3_C	388580000	47831000	0.123092
B1.1_TRINITY_DN221_c0_g1_i1.p1	K05310	PIGG, GPI7; ethanolamine phosphate transferase 2 subunit G [EC:2.7.-.-]	K09100 Metabolism	K09107 Glycan biosynthesis and metabolism	K00563 Glycosylphosphatidylinositol (GPI)-anchor biosynthesis [PATH:ko00563]			Enpp	31385000	0	0
B1.1_TRINITY_DN221_c2_g1_i1.p1									167410000	2227700	0.0133069
B1.1_TRINITY_DN2210_c0_g1_i1.p1	K02732	PSMB1; 20S proteasome subunit beta 6 [EC:3.4.25.1]	K09120 Genetic Information Processing	K09123 Folding, sorting and degradation	K03050 Proteasome [PATH:ko03050]			proteasome_beta_type_1	169292000	241798000	1.42829
B1.1_TRINITY_DN2210_c1_g1_i3.p1	K01392	THOP1; thimet oligopeptidase [EC:3.4.24.15]	K09150 Organismal Systems	K09152 Endocrine system				M3A_TOP	9912400	0	0
B1.1_TRINITY_DN2212_c0_g1_i1.p1								USP_Like	26557000	0	0
B1.1_TRINITY_DN2215_c1_g1_i1.p1									0	2662300
B1.1_TRINITY_DN2218_c2_g1_i1.p1	K01711	gmd, GMDS; GDPmannose 4,6-dehydratase [EC:4.2.1.47]	K09100 Metabolism	K09101 Carbohydrate metabolism	K00051 Fructose and mannose metabolism [PATH:ko00051]			Gmd	2187900	0	0
B1.1_TRINITY_DN2219_c0_g1_i1.p1									22783000	0	0
B1.1_TRINITY_DN222_c0_g1_i2.p1								DSP	1624940	0	0
B1.1_TRINITY_DN222_c0_g3_i1.p1									244740	0	0
B1.1_TRINITY_DN2221_c0_g1_i1.p1	K14152	HIS4; phosphoribosyl-ATP pyrophosphohydrolase / phosphoribosyl-AMP cyclohydrolase / histidinol dehydrogenase [EC:3.6.1.31 3.5.4.19 1.1.1.23]	K09100 Metabolism	K09105 Amino acid metabolism	K00340 Histidine metabolism [PATH:ko00340]			Histidinol_dh	1215350000	243843000	0.200636
B1.1_TRINITY_DN2221_c0_g3_i2.p1									6309660	0	0
B1.1_TRINITY_DN2221_c0_g4_i1.p1	K14152	HIS4; phosphoribosyl-ATP pyrophosphohydrolase / phosphoribosyl-AMP cyclohydrolase / histidinol dehydrogenase [EC:3.6.1.31 3.5.4.19 1.1.1.23]	K09100 Metabolism	K09105 Amino acid metabolism	K00340 Histidine metabolism [PATH:ko00340]			PRA-CH	568240000	106268000	0.187013
B1.1_TRINITY_DN22213_c0_g1_i2.p1	K01179	E3.2.1.4; endoglucanase [EC:3.2.1.4]	K09100 Metabolism	K09101 Carbohydrate metabolism	K00500 Starch and sucrose metabolism [PATH:ko00500]			Glyco_hydro_9	0	56020000
B1.1_TRINITY_DN22269_c0_g1_i1.p1								YdfG	85728000	303211000	3.5369
B1.1_TRINITY_DN2227_c2_g1_i1.p1									5140000	2193000	0.426654
B1.1_TRINITY_DN223_c0_g1_i4.p1								Svf1_C	93310000	201457000	2.15901
B1.1_TRINITY_DN223_c0_g3_i1.p1	K20346	TMED4_9_11; p24 family protein alpha	K09180 Brite Hierarchies	K09182 Protein families: genetic information processing	K04131 Membrane trafficking [BR:ko04131]			EMP24_GP25L	98841000	0	0
B1.1_TRINITY_DN2239_c0_g1_i5.p1	K01755	argH, ASL; argininosuccinate lyase [EC:4.3.2.1]	K09100 Metabolism	K09105 Amino acid metabolism	K00250 Alanine, aspartate and glutamate metabolism [PATH:ko00250]			PLN02646	537590000	345760000	0.643167
B1.1_TRINITY_DN22398_c1_g1_i1.p1	K13179	DDX18, HAS1; ATP-dependent RNA helicase DDX18/HAS1 [EC:3.6.4.13]	K09180 Brite Hierarchies	K09182 Protein families: genetic information processing	K03041 Spliceosome [BR:ko03041]			SF2_C_DEAD	10073600	0	0
B1.1_TRINITY_DN2243_c0_g1_i1.p1									1031330	0	0
B1.1_TRINITY_DN225_c1_g1_i1.p1									5310400	0	0
B1.1_TRINITY_DN2250_c0_g1_i8.p1	K12666	OST1, RPN1; oligosaccharyltransferase complex subunit alpha (ribophorin I)	K09100 Metabolism	K09107 Glycan biosynthesis and metabolism	K00510 N-Glycan biosynthesis [PATH:ko00510]			Ribophorin_I	277920000	0	0
B1.1_TRINITY_DN2250_c1_g1_i6.p1	K10685	UBLE1B, SAE2, UBA2; ubiquitin-like 1-activating enzyme E1 B [EC:6.2.1.45]	K09120 Genetic Information Processing	K09123 Folding, sorting and degradation	K04120 Ubiquitin mediated proteolysis [PATH:ko04120]			Uba2_SUMO	3213300	0	0
B1.1_TRINITY_DN2253_c1_g1_i1.p1	K18757	LARP1; la-related protein 1	K09180 Brite Hierarchies	K09182 Protein families: genetic information processing	K03019 Messenger RNA biogenesis [BR:ko03019]				31917000	0	0
B1.1_TRINITY_DN22555_c0_g1_i7.p1	K01181	E3.2.1.8, xynA; endo-1,4-beta-xylanase [EC:3.2.1.8]	K09180 Brite Hierarchies	K09191 Unclassified: metabolism	K99980 Enzymes with EC numbers		GH10	Glyco_hydro_10	3101800	422195000	136.113
B1.1_TRINITY_DN22555_c0_g2_i1.p1	K01181	E3.2.1.8, xynA; endo-1,4-beta-xylanase [EC:3.2.1.8]	K09180 Brite Hierarchies	K09191 Unclassified: metabolism	K99980 Enzymes with EC numbers		GH10	Glyco_10	6496200	138152000	21.2666
B1.1_TRINITY_DN22555_c0_g3_i1.p1	K01181	E3.2.1.8, xynA; endo-1,4-beta-xylanase [EC:3.2.1.8]	K09180 Brite Hierarchies	K09191 Unclassified: metabolism	K99980 Enzymes with EC numbers		GH10	Glyco_10	0	128503300
B1.1_TRINITY_DN22555_c0_g4_i5.p1	K01181	E3.2.1.8, xynA; endo-1,4-beta-xylanase [EC:3.2.1.8]	K09180 Brite Hierarchies	K09191 Unclassified: metabolism	K99980 Enzymes with EC numbers		GH10	Glyco_10	10538100	235134000	22.3128
B1.1_TRINITY_DN2256_c0_g2_i4.p1	K20478	GOLGB1; golgin subfamily B member 1	K09180 Brite Hierarchies	K09182 Protein families: genetic information processing	K04131 Membrane trafficking [BR:ko04131]				88162000	0	0
B1.1_TRINITY_DN2256_c1_g1_i2.p1	K00850	pfkA, PFK; 6-phosphofructokinase 1 [EC:2.7.1.11]	K09100 Metabolism	K09101 Carbohydrate metabolism	K00010 Glycolysis / Gluconeogenesis [PATH:ko00010]				1146700000	6457400	0.00563129
B1.1_TRINITY_DN2258_c0_g1_i2.p1	K10082	LMAN2, VIP36; lectin, mannose-binding 2	K09120 Genetic Information Processing	K09123 Folding, sorting and degradation	K04141 Protein processing in endoplasmic reticulum [PATH:ko04141]			Lectin_leg-like	190156000	2393400	0.0125865
B1.1_TRINITY_DN2259_c0_g2_i6.p1	K02729	PSMA5; 20S proteasome subunit alpha 5 [EC:3.4.25.1]	K09120 Genetic Information Processing	K09123 Folding, sorting and degradation	K03050 Proteasome [PATH:ko03050]			proteasome_alpha_type_5	518270000	623340000	1.20273
B1.1_TRINITY_DN227_c1_g1_i4.p1								RutF	312110000	47579700	0.152445
B1.1_TRINITY_DN227_c6_g1_i1.p1									2166330	0	0
B1.1_TRINITY_DN2274_c0_g2_i1.p1	K03868	RBX1, ROC1; E3 ubiquitin-protein ligase RBX1 [EC:2.3.2.32]	K09120 Genetic Information Processing	K09123 Folding, sorting and degradation	K04141 Protein processing in endoplasmic reticulum [PATH:ko04141]			mRING-H2-C3H2C2D_RBX1	4680000	0	0
B1.1_TRINITY_DN2274_c1_g2_i1.p1								C2_Munc13_fungal	6642100	0	0
B1.1_TRINITY_DN2275_c2_g1_i1.p1	K00688	PYG, glgP; glycogen phosphorylase [EC:2.4.1.1]	K09100 Metabolism	K09101 Carbohydrate metabolism	K00500 Starch and sucrose metabolism [PATH:ko00500]			GT35_Glycogen_Phosphorylase	10245100000	2.55512e+09	0.249399
B1.1_TRINITY_DN2276_c0_g1_i3.p1	K10609	CUL4; cullin 4	K09120 Genetic Information Processing	K09123 Folding, sorting and degradation	K04120 Ubiquitin mediated proteolysis [PATH:ko04120]			COG5647	1478700	0	0
B1.1_TRINITY_DN2281_c0_g1_i1.p1								STKc_MAP3K-like	21820000	0	0
B1.1_TRINITY_DN2282_c0_g1_i2.p1								His_Phos_2	42102000	210481000	4.99931
B1.1_TRINITY_DN2285_c2_g1_i2.p1	K12470	SH3KBP1, CIN85; SH3 domain-containing kinase-binding protein 1	K09140 Cellular Processes	K09141 Transport and catabolism	K04144 Endocytosis [PATH:ko04144]			SH3	5923600	0	0
B1.1_TRINITY_DN2287_c4_g1_i1.p1	K21991	UNC45; protein unc-45	K09180 Brite Hierarchies	K09182 Protein families: genetic information processing	K03110 Chaperones and folding catalysts [BR:ko03110]				3403320	0	0
B1.1_TRINITY_DN229_c0_g1_i1.p1	K15306	RANBP1; Ran-binding protein 1	K09160 Human Diseases	K09161 Cancer: overview				RanBD_RanBP1	394050000	882300000	2.23906
B1.1_TRINITY_DN229_c2_g1_i1.p1									1940100	0	0
B1.1_TRINITY_DN22918_c0_g1_i1.p1	K02893	RP-L23Ae, RPL23A; large subunit ribosomal protein L23Ae	K09120 Genetic Information Processing	K09122 Translation	K03010 Ribosome [PATH:ko03010]			PTZ00191	0	15889000
B1.1_TRINITY_DN22959_c0_g2_i1.p1									716450	9787800	13.6615
B1.1_TRINITY_DN2301_c1_g1_i2.p1	K14536	RIA1; ribosome assembly protein 1 [EC:3.6.5.-]	K09120 Genetic Information Processing	K09122 Translation	K03008 Ribosome biogenesis in eukaryotes [PATH:ko03008]			EF2_II	11256900	0	0
B1.1_TRINITY_DN2302_c0_g1_i2.p1								CBS_pair_MUG70_2	6780600	0	0
B1.1_TRINITY_DN23039_c0_g1_i1.p1	K10357	MYO5; myosin V	K09160 Human Diseases	K09171 Infectious disease: bacterial	K05130 Pathogenic Escherichia coli infection [PATH:ko05130]			MYSc_Myo5	20193000	0	0
B1.1_TRINITY_DN23040_c0_g1_i1.p1	K02541	MCM3; DNA replication licensing factor MCM3 [EC:3.6.4.12]	K09120 Genetic Information Processing	K09124 Replication and repair	K03030 DNA replication [PATH:ko03030]			MCM3	7535300	0	0
B1.1_TRINITY_DN23097_c0_g1_i1.p1	K00134	GAPDH, gapA; glyceraldehyde 3-phosphate dehydrogenase (phosphorylating) [EC:1.2.1.12]	K09100 Metabolism	K09101 Carbohydrate metabolism	K00010 Glycolysis / Gluconeogenesis [PATH:ko00010]			PLN02272	17839600	0	0
B1.1_TRINITY_DN2310_c0_g1_i1.p1									0	1105600
B1.1_TRINITY_DN2314_c1_g1_i1.p1	K14573	NOP4, RBM28; nucleolar protein 4	K09120 Genetic Information Processing	K09122 Translation	K03008 Ribosome biogenesis in eukaryotes [PATH:ko03008]			RRM4_RBM28_like	15198300	2482300	0.163327
B1.1_TRINITY_DN232_c3_g1_i1.p1									0	345070
B1.1_TRINITY_DN2322_c0_g1_i1.p1	K01758	CTH; cystathionine gamma-lyase [EC:4.4.1.1]	K09100 Metabolism	K09105 Amino acid metabolism	K00260 Glycine, serine and threonine metabolism [PATH:ko00260]			Cys_Met_Meta_PP	694760000	865570000	1.24585
B1.1_TRINITY_DN2323_c1_g1_i1.p1								Aes	4568500	0	0
B1.1_TRINITY_DN2326_c0_g2_i1.p1	K19947	MICAL; F-actin monooxygenase [EC:1.14.13.225]	K09180 Brite Hierarchies	K09182 Protein families: genetic information processing	K04131 Membrane trafficking [BR:ko04131]				7587700	1443000	0.190176
B1.1_TRINITY_DN233_c0_g1_i7.p1								STKc_OSR1_SPAK	74475000	0	0
B1.1_TRINITY_DN2336_c0_g1_i7.p1									3499800	5759900	1.64578
B1.1_TRINITY_DN2336_c4_g1_i2.p1									3272100	16543700	5.05599
B1.1_TRINITY_DN234_c6_g1_i1.p1	K03283	HSPA1s; heat shock 70kDa protein 1/2/6/8	K09120 Genetic Information Processing	K09121 Transcription	K03040 Spliceosome [PATH:ko03040]			ScSsz1p_like_NBD	9238400	0	0
B1.1_TRINITY_DN2342_c5_g1_i1.p1									7710200	0	0
B1.1_TRINITY_DN2347_c0_g1_i1.p1									0	3884100
B1.1_TRINITY_DN23471_c0_g1_i2.p1								SCP	0	418040000
B1.1_TRINITY_DN23471_c0_g2_i1.p1	K01179	E3.2.1.4; endoglucanase [EC:3.2.1.4]	K09100 Metabolism	K09101 Carbohydrate metabolism	K00500 Starch and sucrose metabolism [PATH:ko00500]		GH5_4	Cellulase	0	32240800
B1.1_TRINITY_DN2349_c0_g1_i6.p1	K00721	DPM1; dolichol-phosphate mannosyltransferase [EC:2.4.1.83]	K09100 Metabolism	K09107 Glycan biosynthesis and metabolism	K00510 N-Glycan biosynthesis [PATH:ko00510]			PLN02726	292520000	0	0
B1.1_TRINITY_DN2349_c1_g1_i5.p1	K22857	EEF1AKMT4; EEF1A lysine methyltransferase 4 [EC:2.1.1.-]	K09180 Brite Hierarchies	K09182 Protein families: genetic information processing	K03012 Translation factors [BR:ko03012]				52324000	4959000	0.0947749
B1.1_TRINITY_DN2351_c0_g1_i1.p1	K09493	CCT1, TCP1; T-complex protein 1 subunit alpha	K09180 Brite Hierarchies	K09182 Protein families: genetic information processing	K03110 Chaperones and folding catalysts [BR:ko03110]			TCP1_alpha	169403000	23157300	0.136699
B1.1_TRINITY_DN2351_c0_g1_i5.p1	K09493	CCT1, TCP1; T-complex protein 1 subunit alpha	K09180 Brite Hierarchies	K09182 Protein families: genetic information processing	K03110 Chaperones and folding catalysts [BR:ko03110]			TCP1_alpha	500070000	45453000	0.0908933
B1.1_TRINITY_DN23520_c1_g1_i1.p1									654030000	799020000	1.22169
B1.1_TRINITY_DN23525_c0_g1_i1.p1	K02880	RP-L17e, RPL17; large subunit ribosomal protein L17e	K09120 Genetic Information Processing	K09122 Translation	K03010 Ribosome [PATH:ko03010]			PTZ00178	1615120000	107901000	0.0668068
B1.1_TRINITY_DN2353_c1_g1_i5.p1								BAR_Gvp36	17100800	0	0
B1.1_TRINITY_DN2354_c0_g1_i3.p1									3826000	359060	0.0938474
B1.1_TRINITY_DN2355_c0_g2_i3.p1	K16055	TPS; trehalose 6-phosphate synthase/phosphatase [EC:2.4.1.15 3.1.3.12]	K09100 Metabolism	K09101 Carbohydrate metabolism	K00500 Starch and sucrose metabolism [PATH:ko00500]			PRK14501	106677000	0	0
B1.1_TRINITY_DN2356_c0_g1_i2.p1	K11584	PPP2R5; serine/threonine-protein phosphatase 2A regulatory subunit B'	K09120 Genetic Information Processing	K09122 Translation	K03015 mRNA surveillance pathway [PATH:ko03015]				13503400	7363100	0.545277
B1.1_TRINITY_DN2360_c1_g2_i1.p1	K13280	SEC11, sipW; signal peptidase I [EC:3.4.21.89]	K09120 Genetic Information Processing	K09123 Folding, sorting and degradation	K03060 Protein export [PATH:ko03060]			sigpep_I_arch	72722000	0	0
B1.1_TRINITY_DN2360_c4_g1_i1.p1								Ank_2	44676000	7972000	0.17844
B1.1_TRINITY_DN2361_c0_g1_i1.p1									5628100	25822700	4.58817
B1.1_TRINITY_DN2369_c0_g2_i3.p1	K14170	pheA; chorismate mutase / prephenate dehydratase [EC:5.4.99.5 4.2.1.51]	K09100 Metabolism	K09105 Amino acid metabolism	K00400 Phenylalanine, tyrosine and tryptophan biosynthesis [PATH:ko00400]			PheA2	30776900	0	0
B1.1_TRINITY_DN2371_c0_g1_i1.p1									6890300	0	0
B1.1_TRINITY_DN23728_c0_g1_i1.p1	K00667	FAS2; fatty acid synthase subunit alpha, fungi type [EC:2.3.1.86]	K09100 Metabolism	K09103 Lipid metabolism	K00061 Fatty acid biosynthesis [PATH:ko00061]			Fas_alpha_ACP	11709600	0	0
B1.1_TRINITY_DN23733_c0_g1_i1.p1									0	11882640
B1.1_TRINITY_DN2374_c0_g2_i2.p1	K05755	ARPC4; actin related protein 2/3 complex, subunit 4	K09140 Cellular Processes	K09141 Transport and catabolism	K04144 Endocytosis [PATH:ko04144]			ARPC4	149602000	14521200	0.0970655
B1.1_TRINITY_DN23750_c0_g1_i1.p1	K10408	DNAH; dynein axonemal heavy chain	K09160 Human Diseases	K09164 Neurodegenerative disease				AAA_9	7639300	0	0
B1.1_TRINITY_DN2378_c0_g2_i4.p1						CBM_10		CBM29_CBM65	40755000	5504500000	135.063
B1.1_TRINITY_DN2380_c0_g1_i2.p1	K10704	UBE2V; ubiquitin-conjugating enzyme E2 variant	K09150 Organismal Systems	K09151 Immune system	K04624 Toll and Imd signaling pathway [PATH:ko04624]			COG5078	402410000	119907000	0.297972
B1.1_TRINITY_DN2382_c0_g1_i1.p1									12976000	0	0
B1.1_TRINITY_DN2386_c0_g1_i1.p1	K16365	SGTA; small glutamine-rich tetratricopeptide repeat-containing protein alpha	K09180 Brite Hierarchies	K09182 Protein families: genetic information processing	K03110 Chaperones and folding catalysts [BR:ko03110]			SGTA_dimer	77817000	77900000	1.00107
B1.1_TRINITY_DN2389_c0_g1_i2.p1	K14400	PCF11; pre-mRNA cleavage complex 2 protein Pcf11	K09120 Genetic Information Processing	K09122 Translation	K03015 mRNA surveillance pathway [PATH:ko03015]				416960	0	0
B1.1_TRINITY_DN239_c3_g1_i2.p1								LRR_RI	78321400	40234000	0.513704
B1.1_TRINITY_DN239_c8_g1_i1.p1									0	1864800
B1.1_TRINITY_DN23905_c0_g2_i1.p1	K09291	TPR, MLP1, MLP2; nucleoprotein TPR	K09120 Genetic Information Processing	K09122 Translation	K03013 Nucleocytoplasmic transport [PATH:ko03013]			TPR_MLP1_2	6171500	0	0
B1.1_TRINITY_DN23923_c0_g1_i1.p1									1161000	0	0
B1.1_TRINITY_DN2395_c2_g1_i1.p1	K00656	E2.3.1.54, pflD; formate C-acetyltransferase [EC:2.3.1.54]	K09100 Metabolism	K09101 Carbohydrate metabolism	K00620 Pyruvate metabolism [PATH:ko00620]			PFL1	726550000	129323000	0.177996
B1.1_TRINITY_DN2398_c0_g1_i1.p1	K24722	DNAI3, WDR63; dynein axonemal intermediate chain 3	K09180 Brite Hierarchies	K09183 Protein families: signaling and cellular processes	K04812 Cytoskeleton proteins [BR:ko04812]				598690	0	0
B1.1_TRINITY_DN24_c0_g1_i60.p1								FkpA	39986000	14867000	0.371805
B1.1_TRINITY_DN240_c0_g1_i1.p1	K09228	KRAB; KRAB domain-containing zinc finger protein	K09160 Human Diseases	K09172 Infectious disease: viral					43818000	72525000	1.65514
B1.1_TRINITY_DN2400_c1_g1_i1.p1									84512000	0	0
B1.1_TRINITY_DN2402_c0_g1_i5.p1	K03238	EIF2S2; translation initiation factor 2 subunit 2	K09180 Brite Hierarchies	K09181 Protein families: metabolism	K01009 Protein phosphatases and associated proteins [BR:ko01009]			eIF-5_eIF-2B	590820000	25190100	0.0426358
B1.1_TRINITY_DN2406_c1_g1_i2.p1	K14864	FTSJ1, TRM7; tRNA (cytidine32/guanosine34-2'-O)-methyltransferase [EC:2.1.1.205]	K09180 Brite Hierarchies	K09182 Protein families: genetic information processing	K03016 Transfer RNA biogenesis [BR:ko03016]			RlmE	1973500	2583200	1.30894
B1.1_TRINITY_DN2406_c2_g2_i1.p1									20663000	86094000	4.16658
B1.1_TRINITY_DN2413_c0_g2_i1.p1	K14801	TSR4; pre-rRNA-processing protein TSR4	K09180 Brite Hierarchies	K09182 Protein families: genetic information processing	K03009 Ribosome biogenesis [BR:ko03009]			PDCD2_C	3066200	7623400	2.48627
B1.1_TRINITY_DN2417_c0_g1_i3.p1	K10408	DNAH; dynein axonemal heavy chain	K09160 Human Diseases	K09164 Neurodegenerative disease				Dynein_C	173980000	0	0
B1.1_TRINITY_DN2418_c0_g1_i3.p1	K01874	MARS, metG; methionyl-tRNA synthetase [EC:6.1.1.10]	K09100 Metabolism	K09106 Metabolism of other amino acids	K00450 Selenocompound metabolism [PATH:ko00450]			PLN02610	811320000	1573700	0.00193968
B1.1_TRINITY_DN2425_c0_g1_i2.p1	K12733	PPIL1; peptidyl-prolyl cis-trans isomerase-like 1 [EC:5.2.1.8]	K09120 Genetic Information Processing	K09121 Transcription	K03040 Spliceosome [PATH:ko03040]			cyclophilin_SpCYP2_like	0	6013900
B1.1_TRINITY_DN2425_c0_g3_i1.p1	K01886	QARS, glnS; glutaminyl-tRNA synthetase [EC:6.1.1.18]	K09120 Genetic Information Processing	K09122 Translation	K00970 Aminoacyl-tRNA biosynthesis [PATH:ko00970]			PLN02859	652700000	35396000	0.0542301
B1.1_TRINITY_DN24255_c0_g1_i1.p1	K00698	CHS1; chitin synthase [EC:2.4.1.16]	K09100 Metabolism	K09101 Carbohydrate metabolism	K00520 Amino sugar and nucleotide sugar metabolism [PATH:ko00520]			Chitin_synth_2	7631700	0	0
B1.1_TRINITY_DN24269_c0_g1_i1.p1	K22539	PLY; pectate lyase [EC:4.2.2.2]	K09100 Metabolism	K09101 Carbohydrate metabolism	K00040 Pentose and glucuronate interconversions [PATH:ko00040]		PL3_2	Pectate_lyase	14554200	991690000	68.1377
B1.1_TRINITY_DN2427_c0_g1_i3.p1	K00698	CHS1; chitin synthase [EC:2.4.1.16]	K09100 Metabolism	K09101 Carbohydrate metabolism	K00520 Amino sugar and nucleotide sugar metabolism [PATH:ko00520]			Chitin_synth_2	19163500	0	0
B1.1_TRINITY_DN2428_c0_g1_i3.p1	K14803	PTC2_3; protein phosphatase PTC2/3 [EC:3.1.3.16]	K09180 Brite Hierarchies	K09181 Protein families: metabolism	K01009 Protein phosphatases and associated proteins [BR:ko01009]			PP2Cc	318890000	20107200	0.0630537
B1.1_TRINITY_DN2429_c1_g1_i6.p1	K03062	PSMC1, RPT2; 26S proteasome regulatory subunit T2	K09120 Genetic Information Processing	K09123 Folding, sorting and degradation	K03050 Proteasome [PATH:ko03050]			PTZ00361	453420000	21144600	0.0466336
B1.1_TRINITY_DN2431_c0_g1_i1.p1								YdfG	122085000	321258000	2.63143
B1.1_TRINITY_DN2431_c0_g1_i12.p1								YdfG	30066700	153055000	5.09052
B1.1_TRINITY_DN2431_c0_g1_i43.p1								YdfG	184481000	1177970000	6.38532
B1.1_TRINITY_DN24324_c0_g1_i1.p1	K01858	INO1, ISYNA1; myo-inositol-1-phosphate synthase [EC:5.5.1.4]	K09100 Metabolism	K09101 Carbohydrate metabolism	K00562 Inositol phosphate metabolism [PATH:ko00562]			NAD_binding_5	185046000	666290000	3.60067
B1.1_TRINITY_DN2437_c1_g1_i1.p1	K14816	REI1; pre-60S factor REI1	K09180 Brite Hierarchies	K09182 Protein families: genetic information processing	K03009 Ribosome biogenesis [BR:ko03009]			zf-C2H2_2	46385000	0	0
B1.1_TRINITY_DN2439_c1_g1_i1.p1	K25762							Acetyltransf_3	1036500	1265000	1.22045
B1.1_TRINITY_DN24408_c0_g1_i1.p1	K14309	NUP93, NIC96; nuclear pore complex protein Nup93	K09120 Genetic Information Processing	K09122 Translation	K03013 Nucleocytoplasmic transport [PATH:ko03013]			Nic96	3349600	0	0
B1.1_TRINITY_DN2441_c0_g1_i4.p1									832770	0	0
B1.1_TRINITY_DN2446_c0_g1_i1.p1	K11338	RUVBL2, RVB2, INO80J; RuvB-like protein 2 [EC:3.6.4.12]	K09180 Brite Hierarchies	K09182 Protein families: genetic information processing	K03036 Chromosome and associated proteins [BR:ko03036]			TIP49	268860000	17736200	0.0659682
B1.1_TRINITY_DN2452_c1_g2_i1.p1	K14306	NUP62, NSP1; nuclear pore complex protein Nup62	K09120 Genetic Information Processing	K09122 Translation	K03013 Nucleocytoplasmic transport [PATH:ko03013]			Nsp1_C	55166000	1573900	0.0285303
B1.1_TRINITY_DN24529_c0_g1_i2.p2									3076000	0	0
B1.1_TRINITY_DN2455_c1_g1_i2.p1	K14574	SDO1, SBDS; ribosome maturation protein SDO1	K09120 Genetic Information Processing	K09122 Translation	K03008 Ribosome biogenesis in eukaryotes [PATH:ko03008]			Sdo1	10388800	0	0
B1.1_TRINITY_DN2455_c8_g1_i1.p1	K00668	FAS1; fatty acid synthase subunit beta, fungi type [EC:2.3.1.86]	K09100 Metabolism	K09103 Lipid metabolism	K00061 Fatty acid biosynthesis [PATH:ko00061]			COG4981	19850600	0	0
B1.1_TRINITY_DN2463_c0_g1_i4.p1								FSH1	46833000	0	0
B1.1_TRINITY_DN2465_c0_g1_i1.p1									4060600	1601900	0.394498
B1.1_TRINITY_DN2465_c0_g1_i2.p3									1614000	0	0
B1.1_TRINITY_DN2468_c2_g1_i1.p1	K02955	RP-S14e, RPS14; small subunit ribosomal protein S14e	K09120 Genetic Information Processing	K09122 Translation	K03010 Ribosome [PATH:ko03010]			PTZ00129	2575900000	207691000	0.0806285
B1.1_TRINITY_DN24680_c0_g1_i1.p1									2542600	0	0
B1.1_TRINITY_DN2469_c0_g1_i1.p1									0	31532000
B1.1_TRINITY_DN24696_c0_g1_i1.p1	K01194	TREH, treA, treF; alpha,alpha-trehalase [EC:3.2.1.28]	K09100 Metabolism	K09101 Carbohydrate metabolism	K00500 Starch and sucrose metabolism [PATH:ko00500]			Trehalase	5896900	0	0
B1.1_TRINITY_DN24714_c0_g1_i1.p1									29895900	0	0
B1.1_TRINITY_DN2472_c2_g1_i1.p1	K01784	galE, GALE; UDP-glucose 4-epimerase [EC:5.1.3.2]	K09100 Metabolism	K09101 Carbohydrate metabolism	K00052 Galactose metabolism [PATH:ko00052]			UDP_G4E_1_SDR_e	0	8990200
B1.1_TRINITY_DN2473_c0_g1_i1.p1								RabGAP-TBC	10789000	0	0
B1.1_TRINITY_DN2473_c1_g1_i6.p1	K16944	SEPT7, CDC3; septin 7	K09160 Human Diseases	K09171 Infectious disease: bacterial	K05131 Shigellosis [PATH:ko05131]			CDC_Septin	336480000	5060900	0.0150407
B1.1_TRINITY_DN24730_c0_g1_i1.p1	K00668	FAS1; fatty acid synthase subunit beta, fungi type [EC:2.3.1.86]	K09100 Metabolism	K09103 Lipid metabolism	K00061 Fatty acid biosynthesis [PATH:ko00061]				5046400	0	0
B1.1_TRINITY_DN2477_c0_g1_i2.p1	K05349	bglX; beta-glucosidase [EC:3.2.1.21]	K09100 Metabolism	K09101 Carbohydrate metabolism	K00500 Starch and sucrose metabolism [PATH:ko00500]		GH3	PRK15098	0	10517200
B1.1_TRINITY_DN2479_c0_g2_i1.p1	K03006	RPB1, POLR2A; DNA-directed RNA polymerase II subunit RPB1 [EC:2.7.7.6]	K09120 Genetic Information Processing	K09121 Transcription	K03020 RNA polymerase [PATH:ko03020]				1896500	0	0
B1.1_TRINITY_DN24856_c0_g1_i1.p1	K03737	por, nifJ; pyruvate-ferredoxin/flavodoxin oxidoreductase [EC:1.2.7.1 1.2.7.-]	K09100 Metabolism	K09101 Carbohydrate metabolism	K00010 Glycolysis / Gluconeogenesis [PATH:ko00010]			TPP_PFOR_PNO	9325900	0	0
B1.1_TRINITY_DN2486_c0_g1_i3.p1	K01858	INO1, ISYNA1; myo-inositol-1-phosphate synthase [EC:5.5.1.4]	K09100 Metabolism	K09101 Carbohydrate metabolism	K00562 Inositol phosphate metabolism [PATH:ko00562]			PLN02438	6.4109e+09	1.94471e+10	3.03344
B1.1_TRINITY_DN2488_c0_g1_i3.p1	K08056	PDIA3, GRP58; protein disulfide-isomerase A3 [EC:5.3.4.1]	K09120 Genetic Information Processing	K09123 Folding, sorting and degradation	K04141 Protein processing in endoplasmic reticulum [PATH:ko04141]			ER_PDI_fam	452640000	154172000	0.340606
B1.1_TRINITY_DN2488_c1_g1_i5.p1								W2_eIF5C_like	408840000	59577000	0.145722
B1.1_TRINITY_DN2488_c2_g1_i4.p1	K01536	ENA; P-type Na+/K+ transporter [EC:7.2.2.3 7.2.2.-]	K09180 Brite Hierarchies	K09191 Unclassified: metabolism	K99980 Enzymes with EC numbers			P-type_ATPase_Na_ENA	32338000	0	0
B1.1_TRINITY_DN2488_c3_g1_i2.p1	K00928	lysC; aspartate kinase [EC:2.7.2.4]	K09100 Metabolism	K09105 Amino acid metabolism	K00260 Glycine, serine and threonine metabolism [PATH:ko00260]			PLN02551	26977000	0	0
B1.1_TRINITY_DN24883_c0_g1_i1.p1									2310200	0	0
B1.1_TRINITY_DN24900_c0_g1_i1.p1								PKS	32236000	2039500	0.0632678
B1.1_TRINITY_DN2492_c0_g3_i6.p1									38285000	0	0
B1.1_TRINITY_DN2492_c0_g3_i7.p1									13948800	0	0
B1.1_TRINITY_DN2492_c1_g2_i2.p1	K05658	ABCB1, CD243; ATP-binding cassette, subfamily B (MDR/TAP), member 1 [EC:7.6.2.2]	K09130 Environmental Information Processing	K09131 Membrane transport	K02010 ABC transporters [PATH:ko02010]			ABC_6TM_Pgp_ABCB1_D1_like	19934700	3039200	0.152458
B1.1_TRINITY_DN2492_c2_g1_i1.p1	K00018	hprA; glycerate dehydrogenase [EC:1.1.1.29]	K09100 Metabolism	K09101 Carbohydrate metabolism	K00630 Glyoxylate and dicarboxylate metabolism [PATH:ko00630]			2-Hacid_dh_4	24170200	76475000	3.16402
B1.1_TRINITY_DN24966_c0_g1_i1.p1	K03255	TIF31, CLU1; protein TIF31	K09180 Brite Hierarchies	K09182 Protein families: genetic information processing	K03012 Translation factors [BR:ko03012]			CLU	21870200	0	0
B1.1_TRINITY_DN2497_c0_g2_i4.p1	K05349	bglX; beta-glucosidase [EC:3.2.1.21]	K09100 Metabolism	K09101 Carbohydrate metabolism	K00500 Starch and sucrose metabolism [PATH:ko00500]			Glyco_hydro_3_C	0	938500000
B1.1_TRINITY_DN2497_c0_g2_i5.p1	K05349	bglX; beta-glucosidase [EC:3.2.1.21]	K09100 Metabolism	K09101 Carbohydrate metabolism	K00500 Starch and sucrose metabolism [PATH:ko00500]		GH3	BglX	10555900	20489500	1.94105
B1.1_TRINITY_DN2497_c0_g2_i6.p1	K05349	bglX; beta-glucosidase [EC:3.2.1.21]	K09100 Metabolism	K09101 Carbohydrate metabolism	K00500 Starch and sucrose metabolism [PATH:ko00500]		GH3	Glyco_hydro_3_C	25735700	128430000	4.99034
B1.1_TRINITY_DN2498_c0_g1_i3.p1								PLN03120	564760000	286837000	0.507892
B1.1_TRINITY_DN2498_c1_g1_i3.p2									0	14565000
B1.1_TRINITY_DN25_c0_g1_i4.p1	K16609	TTLL12; tubulin--tyrosine ligase-like protein 12	K09180 Brite Hierarchies	K09183 Protein families: signaling and cellular processes	K04812 Cytoskeleton proteins [BR:ko04812]				31570000	0	0
B1.1_TRINITY_DN250_c0_g1_i1.p1									86782000	77540000	0.893503
B1.1_TRINITY_DN25002_c0_g1_i1.p1	K20223	IPO7, RANBP7; importin-7	K09120 Genetic Information Processing	K09122 Translation	K03013 Nucleocytoplasmic transport [PATH:ko03013]			SXM1	22240000	0	0
B1.1_TRINITY_DN2501_c1_g1_i2.p1									1921340	3308400	1.72192
B1.1_TRINITY_DN25010_c0_g1_i1.p1	K05349	bglX; beta-glucosidase [EC:3.2.1.21]	K09100 Metabolism	K09101 Carbohydrate metabolism	K00500 Starch and sucrose metabolism [PATH:ko00500]			Glyco_hydro_3_C	0	247020000
B1.1_TRINITY_DN25043_c0_g1_i1.p1									13536900	0	0
B1.1_TRINITY_DN2507_c0_g1_i2.p1	K19877	CHS5; chitin biosynthesis protein CHS5	K09180 Brite Hierarchies	K09182 Protein families: genetic information processing	K04131 Membrane trafficking [BR:ko04131]			fn3_2	22400000	1129900	0.050442
B1.1_TRINITY_DN251_c1_g1_i1.p1								CoA_binding_2	734320000	770760000	1.04962
B1.1_TRINITY_DN2516_c0_g1_i1.p1	K20304	TRAPPC6, TRS33; trafficking protein particle complex subunit 6	K09180 Brite Hierarchies	K09182 Protein families: genetic information processing	K04131 Membrane trafficking [BR:ko04131]			TRAPPC6A_Trs33	16338500	0	0
B1.1_TRINITY_DN252_c0_g1_i1.p1								Rab11BD_RAB3IP_like	7673800	1475600	0.192291
B1.1_TRINITY_DN2520_c1_g1_i4.p1	K00600	glyA, SHMT; glycine hydroxymethyltransferase [EC:2.1.2.1]	K09100 Metabolism	K09101 Carbohydrate metabolism	K00630 Glyoxylate and dicarboxylate metabolism [PATH:ko00630]			PLN03226	66194000	0	0
B1.1_TRINITY_DN2522_c0_g4_i1.p1									8664900	0	0
B1.1_TRINITY_DN2525_c1_g1_i1.p1	K20359	RABAC1, PRAF1; PRA1 family protein 1	K09180 Brite Hierarchies	K09182 Protein families: genetic information processing	K04131 Membrane trafficking [BR:ko04131]			PRA1	4568400	0	0
B1.1_TRINITY_DN25283_c0_g1_i1.p1	K00131	gapN; glyceraldehyde-3-phosphate dehydrogenase (NADP+) [EC:1.2.1.9]	K09100 Metabolism	K09101 Carbohydrate metabolism	K00010 Glycolysis / Gluconeogenesis [PATH:ko00010]			ALDH_F11_NP-GAPDH	4755900	0	0
B1.1_TRINITY_DN25286_c0_g1_i1.p1									13777300	4481200	0.32526
B1.1_TRINITY_DN25289_c2_g1_i1.p1	K02997	RP-S9e, RPS9; small subunit ribosomal protein S9e	K09120 Genetic Information Processing	K09122 Translation	K03010 Ribosome [PATH:ko03010]			PTZ00155	4.2643e+09	141723000	0.0332348
B1.1_TRINITY_DN253_c5_g1_i1.p1									7883900	4520200	0.573346
B1.1_TRINITY_DN25322_c0_g1_i1.p1									4770600	0	0
B1.1_TRINITY_DN25338_c0_g1_i2.p1	K14537	NUG2, GNL2; nuclear GTP-binding protein	K09120 Genetic Information Processing	K09122 Translation	K03008 Ribosome biogenesis in eukaryotes [PATH:ko03008]			NGP_1	4335100	0	0
B1.1_TRINITY_DN2534_c2_g1_i1.p1									1501700	0	0
B1.1_TRINITY_DN25340_c0_g1_i1.p1	K00264	GLT1; glutamate synthase (NADH) [EC:1.4.1.14]	K09100 Metabolism	K09102 Energy metabolism	K00910 Nitrogen metabolism [PATH:ko00910]			gltD	240386000	13196000	0.054895
B1.1_TRINITY_DN25359_c0_g1_i1.p1									0	8709800
B1.1_TRINITY_DN2547_c0_g2_i2.p1									0	122770000
B1.1_TRINITY_DN2548_c0_g1_i6.p1	K12845	SNU13, NHP2L; U4/U6 small nuclear ribonucleoprotein SNU13	K09120 Genetic Information Processing	K09121 Transcription	K03040 Spliceosome [PATH:ko03040]			SNU13	0	1290000
B1.1_TRINITY_DN2548_c0_g1_i7.p1	K12845	SNU13, NHP2L; U4/U6 small nuclear ribonucleoprotein SNU13	K09120 Genetic Information Processing	K09121 Transcription	K03040 Spliceosome [PATH:ko03040]			SNU13	161104000	31387100	0.194825
B1.1_TRINITY_DN25481_c0_g1_i1.p1	K03686	dnaJ; molecular chaperone DnaJ	K09180 Brite Hierarchies	K09182 Protein families: genetic information processing	K03110 Chaperones and folding catalysts [BR:ko03110]			DnaJ	15497500	0	0
B1.1_TRINITY_DN2557_c0_g1_i13.p1	K13525	VCP, CDC48; transitional endoplasmic reticulum ATPase	K09120 Genetic Information Processing	K09123 Folding, sorting and degradation	K04141 Protein processing in endoplasmic reticulum [PATH:ko04141]			CDC48	2671800000	895280000	0.335085
B1.1_TRINITY_DN256_c0_g3_i5.p1									579740000	66434000	0.114593
B1.1_TRINITY_DN25647_c0_g1_i1.p1	K14288	XPOT; exportin-T	K09120 Genetic Information Processing	K09122 Translation	K03013 Nucleocytoplasmic transport [PATH:ko03013]			Exportin-T	2394800	0	0
B1.1_TRINITY_DN2566_c0_g2_i1.p1								CE4_ClCDA_like	0	68768000
B1.1_TRINITY_DN2567_c0_g1_i8.p1	K03252	EIF3C; translation initiation factor 3 subunit C	K09180 Brite Hierarchies	K09182 Protein families: genetic information processing	K03012 Translation factors [BR:ko03012]			eIF-3c_N	577000000	2025700	0.00351075
B1.1_TRINITY_DN25715_c0_g1_i1.p1									27655600	0	0
B1.1_TRINITY_DN2572_c1_g2_i2.p1	K00967	PCYT2; ethanolamine-phosphate cytidylyltransferase [EC:2.7.7.14]	K09100 Metabolism	K09103 Lipid metabolism	K00564 Glycerophospholipid metabolism [PATH:ko00564]			CCT	89555000	0	0
B1.1_TRINITY_DN25740_c0_g1_i1.p1	K14558	PWP2, UTP1; periodic tryptophan protein 2	K09120 Genetic Information Processing	K09122 Translation	K03008 Ribosome biogenesis in eukaryotes [PATH:ko03008]			WD40	1208000	0	0
B1.1_TRINITY_DN258_c0_g2_i3.p1	K23855	KCNIP; Kv channel-interacting protein	K09180 Brite Hierarchies	K09183 Protein families: signaling and cellular processes	K04990 Domain-containing proteins not elsewhere classified [BR:ko04990]				69140000	14746500	0.213285
B1.1_TRINITY_DN258_c4_g1_i1.p1									3658400	7676500	2.09832
B1.1_TRINITY_DN25812_c0_g1_i1.p1									0	13492700
B1.1_TRINITY_DN25855_c0_g1_i1.p1									30845000	17179800	0.556972
B1.1_TRINITY_DN25877_c0_g1_i1.p1									3882400	28126000	7.24449
B1.1_TRINITY_DN25892_c0_g1_i1.p1	K10413	DYNC1H; dynein cytoplasmic 1 heavy chain	K09140 Cellular Processes	K09141 Transport and catabolism	K04145 Phagosome [PATH:ko04145]			Dynein_heavy	4356900	0	0
B1.1_TRINITY_DN25894_c0_g1_i1.p1	K22539	PLY; pectate lyase [EC:4.2.2.2]	K09100 Metabolism	K09101 Carbohydrate metabolism	K00040 Pentose and glucuronate interconversions [PATH:ko00040]		PL3	Pectate_lyase	67928000	212639000	3.13036
B1.1_TRINITY_DN259_c0_g2_i3.p1									0	6170700
B1.1_TRINITY_DN259_c2_g1_i1.p1	K14792	RRP5, PDCD11; rRNA biogenesis protein RRP5	K09180 Brite Hierarchies	K09182 Protein families: genetic information processing	K03009 Ribosome biogenesis [BR:ko03009]				15748800	0	0
B1.1_TRINITY_DN2594_c0_g1_i3.p1	K05236	COPA, RET1; coatomer subunit alpha	K09180 Brite Hierarchies	K09182 Protein families: genetic information processing	K04131 Membrane trafficking [BR:ko04131]			COPI_C	35720000	0	0
B1.1_TRINITY_DN2597_c0_g1_i8.p1	K20649	ARHGAP39; Rho GTPase-activating protein 39	K09180 Brite Hierarchies	K09182 Protein families: genetic information processing	K04131 Membrane trafficking [BR:ko04131]			RhoGAP_KIAA1688	5312200	0	0
B1.1_TRINITY_DN2597_c0_g2_i3.p1	K20649	ARHGAP39; Rho GTPase-activating protein 39	K09180 Brite Hierarchies	K09182 Protein families: genetic information processing	K04131 Membrane trafficking [BR:ko04131]			MyTH4	16230500	0	0
B1.1_TRINITY_DN25990_c0_g1_i1.p1								CotH	0	8267800
B1.1_TRINITY_DN26_c0_g4_i1.p1	K03767	PPIA; peptidyl-prolyl cis-trans isomerase A (cyclophilin A) [EC:5.2.1.8]	K09140 Cellular Processes	K09143 Cell growth and death	K04217 Necroptosis [PATH:ko04217]			cyclophilin_ABH_like	1451220000	2.3535e+09	1.62174
B1.1_TRINITY_DN260_c3_g1_i1.p1	K14775	UTP30, RSL1D1; ribosome biogenesis protein UTP30	K09180 Brite Hierarchies	K09182 Protein families: genetic information processing	K03009 Ribosome biogenesis [BR:ko03009]				16411500	0	0
B1.1_TRINITY_DN2600_c0_g1_i7.p1	K02207	UBE2R, UBC3, CDC34; ubiquitin-conjugating enzyme E2 R [EC:2.3.2.23]	K09120 Genetic Information Processing	K09123 Folding, sorting and degradation	K04120 Ubiquitin mediated proteolysis [PATH:ko04120]			COG5078	22899000	7545700	0.329521
B1.1_TRINITY_DN2600_c0_g4_i1.p1									1405000	210792000	150.03
B1.1_TRINITY_DN2603_c0_g1_i1.p1	K01657	trpE; anthranilate synthase component I [EC:4.1.3.27]	K09100 Metabolism	K09105 Amino acid metabolism	K00400 Phenylalanine, tyrosine and tryptophan biosynthesis [PATH:ko00400]			Anth_synt_I_N	48450000	7826000	0.161527
B1.1_TRINITY_DN2603_c1_g1_i1.p1									80242000	863330	0.0107591
B1.1_TRINITY_DN2604_c0_g1_i4.p1	K08486	STX1B_2_3; syntaxin 1B/2/3	K09120 Genetic Information Processing	K09123 Folding, sorting and degradation	K04130 SNARE interactions in vesicular transport [PATH:ko04130]			COG5074	44154000	1593400	0.0360873
B1.1_TRINITY_DN2606_c0_g1_i1.p1								FtsJ	22033000	0	0
B1.1_TRINITY_DN2606_c1_g3_i1.p1									1255500	1738100	1.38439
B1.1_TRINITY_DN2606_c1_g4_i2.p1	K01897	ACSL, fadD; long-chain acyl-CoA synthetase [EC:6.2.1.3]	K09100 Metabolism	K09103 Lipid metabolism	K00061 Fatty acid biosynthesis [PATH:ko00061]			LC-FACS_euk	17496300	0	0
B1.1_TRINITY_DN26070_c0_g1_i1.p1								RNAP_I_RPA1_N	7145900	0	0
B1.1_TRINITY_DN2609_c0_g1_i1.p1	K04486	E3.1.3.15B; histidinol-phosphatase (PHP family) [EC:3.1.3.15]	K09100 Metabolism	K09105 Amino acid metabolism	K00340 Histidine metabolism [PATH:ko00340]			PHP_HisPPase_Hisj_like	7539300	5968200	0.791612
B1.1_TRINITY_DN26091_c0_g1_i1.p1									841310	0	0
B1.1_TRINITY_DN261_c3_g1_i1.p1	K17914	KIF13; kinesin family member 13	K09180 Brite Hierarchies	K09183 Protein families: signaling and cellular processes	K04812 Cytoskeleton proteins [BR:ko04812]				32121000	5840700	0.181834
B1.1_TRINITY_DN2610_c0_g1_i44.p1									15941800	5771650	0.362045
B1.1_TRINITY_DN2613_c1_g1_i1.p1	K13566	NIT2, yafV; omega-amidase [EC:3.5.1.3]	K09100 Metabolism	K09105 Amino acid metabolism	K00250 Alanine, aspartate and glutamate metabolism [PATH:ko00250]			nitrilase_5	0	1618400
B1.1_TRINITY_DN26175_c0_g2_i1.p1									8170800	0	0
B1.1_TRINITY_DN2619_c0_g1_i9.p1	K03456	PPP2R1; serine/threonine-protein phosphatase 2A regulatory subunit A	K09120 Genetic Information Processing	K09122 Translation	K03015 mRNA surveillance pathway [PATH:ko03015]				71026000	11094000	0.156196
B1.1_TRINITY_DN262_c0_g2_i4.p1	K05768	GSN; gelsolin	K09140 Cellular Processes	K09142 Cell motility	K04810 Regulation of actin cytoskeleton [PATH:ko04810]			gelsolin_S1_like	324190000	56442000	0.174102
B1.1_TRINITY_DN2633_c0_g1_i1.p1	K05692	ACTB_G1; actin beta/gamma 1	K09130 Environmental Information Processing	K09132 Signal transduction	K04015 Rap1 signaling pathway [PATH:ko04015]			PTZ00281	37934000000	3301130000	0.087023
B1.1_TRINITY_DN26391_c0_g1_i1.p1									7545400	75337000	9.98449
B1.1_TRINITY_DN2640_c0_g2_i1.p1	K11594	DDX3X, bel; ATP-dependent RNA helicase DDX3X [EC:3.6.4.13]	K09150 Organismal Systems	K09151 Immune system	K04622 RIG-I-like receptor signaling pathway [PATH:ko04622]			DEADc_DDX3	48568900	0	0
B1.1_TRINITY_DN2641_c0_g1_i3.p1									0	13484000
B1.1_TRINITY_DN265_c1_g1_i1.p1	K03008	RPB11, POLR2J; DNA-directed RNA polymerase II subunit RPB11	K09120 Genetic Information Processing	K09121 Transcription	K03020 RNA polymerase [PATH:ko03020]			RNAP_II_RPB11	8818600	0	0
B1.1_TRINITY_DN2659_c0_g1_i1.p1									10220200	49763000	4.86908
B1.1_TRINITY_DN2659_c0_g2_i1.p1								Motile_Sperm	35985000	4902000	0.136223
B1.1_TRINITY_DN2660_c0_g1_i5.p1	K11292	SUPT6H, SPT6; transcription elongation factor SPT6	K09180 Brite Hierarchies	K09182 Protein families: genetic information processing	K03021 Transcription machinery [BR:ko03021]			Tex	25289900	0	0
B1.1_TRINITY_DN2667_c0_g1_i1.p1								Auto_anti-p27	2104100	0	0
B1.1_TRINITY_DN2669_c0_g1_i6.p1	K00809	DHPS, dys; deoxyhypusine synthase [EC:2.5.1.46]	K09180 Brite Hierarchies	K09191 Unclassified: metabolism	K99980 Enzymes with EC numbers			DS	93125000	11828300	0.127015
B1.1_TRINITY_DN2669_c0_g1_i7.p1	K00809	DHPS, dys; deoxyhypusine synthase [EC:2.5.1.46]	K09180 Brite Hierarchies	K09191 Unclassified: metabolism	K99980 Enzymes with EC numbers			DS	124370000	23491700	0.188886
B1.1_TRINITY_DN2673_c3_g1_i1.p1	K01187	malZ; alpha-glucosidase [EC:3.2.1.20]	K09100 Metabolism	K09101 Carbohydrate metabolism	K00052 Galactose metabolism [PATH:ko00052]			NtCtMGAM_N	11970000	0	0
B1.1_TRINITY_DN2675_c0_g1_i2.p1									0	26168300
B1.1_TRINITY_DN2678_c0_g1_i1.p1								Spr	37895000	504975000	13.3256
B1.1_TRINITY_DN268_c0_g1_i8.p1	K03032	PSMD1, RPN2; 26S proteasome regulatory subunit N2	K09120 Genetic Information Processing	K09123 Folding, sorting and degradation	K03050 Proteasome [PATH:ko03050]			RPN2	678950000	33657100	0.0495723
B1.1_TRINITY_DN268_c0_g2_i1.p1	K03032	PSMD1, RPN2; 26S proteasome regulatory subunit N2	K09120 Genetic Information Processing	K09123 Folding, sorting and degradation	K03050 Proteasome [PATH:ko03050]			RPN2_C	14749300	5278300	0.357868
B1.1_TRINITY_DN268_c1_g1_i2.p1	K03150	thiH; 2-iminoacetate synthase [EC:4.1.99.19]	K09100 Metabolism	K09108 Metabolism of cofactors and vitamins	K00730 Thiamine metabolism [PATH:ko00730]			rSAM_HydG	4.4324e+09	186494000	0.0420752
B1.1_TRINITY_DN26803_c0_g1_i1.p1									32700100	443720000	13.5694
B1.1_TRINITY_DN26806_c0_g1_i1.p1									10204000	0	0
B1.1_TRINITY_DN26808_c2_g1_i1.p1	K02960	RP-S16e, RPS16; small subunit ribosomal protein S16e	K09120 Genetic Information Processing	K09122 Translation	K03010 Ribosome [PATH:ko03010]			PLN00210	2.9803e+09	304555000	0.102189
B1.1_TRINITY_DN2681_c1_g1_i6.p1								HisC	484160000	72318000	0.149368
B1.1_TRINITY_DN26818_c0_g1_i1.p1								UNC45-central	564200	0	0
B1.1_TRINITY_DN26821_c0_g1_i1.p1									0	44916800
B1.1_TRINITY_DN26822_c1_g1_i1.p1	K02936	RP-L7Ae, RPL7A; large subunit ribosomal protein L7Ae	K09120 Genetic Information Processing	K09122 Translation	K03010 Ribosome [PATH:ko03010]			PTZ00365	2205300000	328650000	0.149027
B1.1_TRINITY_DN26825_c0_g1_i1.p1	K03255	TIF31, CLU1; protein TIF31	K09180 Brite Hierarchies	K09182 Protein families: genetic information processing	K03012 Translation factors [BR:ko03012]			CLU	8995700	0	0
B1.1_TRINITY_DN26838_c0_g1_i1.p1	K06271	TLN; talin	K09130 Environmental Information Processing	K09132 Signal transduction	K04015 Rap1 signaling pathway [PATH:ko04015]			ILWEQ	839040	9153500	10.9095
B1.1_TRINITY_DN2685_c0_g1_i1.p1	K12492	ARFGAP1; ADP-ribosylation factor GTPase-activating protein 1	K09140 Cellular Processes	K09141 Transport and catabolism	K04144 Endocytosis [PATH:ko04144]			ArfGap_ArfGap1	6795500	2784500	0.409756
B1.1_TRINITY_DN2685_c1_g3_i1.p1	K01262	pepP; Xaa-Pro aminopeptidase [EC:3.4.11.9]	K09180 Brite Hierarchies	K09181 Protein families: metabolism	K01002 Peptidases and inhibitors [BR:ko01002]			APP	179573000	410590000	2.28648
B1.1_TRINITY_DN26851_c0_g1_i1.p1	K03255	TIF31, CLU1; protein TIF31	K09180 Brite Hierarchies	K09182 Protein families: genetic information processing	K03012 Translation factors [BR:ko03012]				15151300	0	0
B1.1_TRINITY_DN26871_c0_g1_i1.p1	K18442	ARFGEF, BIG; brefeldin A-inhibited guanine nucleotide-exchange protein	K09140 Cellular Processes	K09141 Transport and catabolism	K04144 Endocytosis [PATH:ko04144]			Sec7	7852100	0	0
B1.1_TRINITY_DN26896_c0_g1_i1.p1	K00667	FAS2; fatty acid synthase subunit alpha, fungi type [EC:2.3.1.86]	K09100 Metabolism	K09103 Lipid metabolism	K00061 Fatty acid biosynthesis [PATH:ko00061]				15730300	0	0
B1.1_TRINITY_DN26896_c0_g1_i1.p1	K00668	FAS1; fatty acid synthase subunit beta, fungi type [EC:2.3.1.86]	K09100 Metabolism	K09103 Lipid metabolism	K00061 Fatty acid biosynthesis [PATH:ko00061]				15730300	0	0
B1.1_TRINITY_DN2690_c0_g1_i1.p1									26575000	27418900	1.03176
B1.1_TRINITY_DN26906_c0_g1_i1.p1								PKS_KR	152798000	2389300	0.015637
B1.1_TRINITY_DN2691_c1_g1_i2.p1	K00698	CHS1; chitin synthase [EC:2.4.1.16]	K09100 Metabolism	K09101 Carbohydrate metabolism	K00520 Amino sugar and nucleotide sugar metabolism [PATH:ko00520]			Chitin_synth_2	79608000	0	0
B1.1_TRINITY_DN26921_c0_g1_i1.p1	K01092	E3.1.3.25, IMPA, suhB; myo-inositol-1(or 4)-monophosphatase [EC:3.1.3.25]	K09100 Metabolism	K09101 Carbohydrate metabolism	K00562 Inositol phosphate metabolism [PATH:ko00562]			IMPase	3415200	23091000	6.76124
B1.1_TRINITY_DN26922_c0_g1_i1.p1	K00750	GYG1, GYG2; glycogenin [EC:2.4.1.186]	K09100 Metabolism	K09101 Carbohydrate metabolism	K00500 Starch and sucrose metabolism [PATH:ko00500]			GT8_Glycogenin	320670000	2017800	0.00629245
B1.1_TRINITY_DN26943_c0_g1_i1.p1	K03002	RPA2, POLR1B; DNA-directed RNA polymerase I subunit RPA2 [EC:2.7.7.6]	K09120 Genetic Information Processing	K09121 Transcription	K03020 RNA polymerase [PATH:ko03020]			RNA_pol_Rpa2_4	9523000	0	0
B1.1_TRINITY_DN2696_c0_g2_i2.p1								SH3_Fus1p	140278000	63114000	0.449921
B1.1_TRINITY_DN26967_c0_g1_i1.p1									17666800	0	0
B1.1_TRINITY_DN26968_c0_g1_i1.p1									0	1366900
B1.1_TRINITY_DN26973_c0_g1_i1.p1								ALIX_LYPXL_bnd	0	183700
B1.1_TRINITY_DN26980_c0_g1_i1.p1	K01218	gmuG; mannan endo-1,4-beta-mannosidase [EC:3.2.1.78]	K09100 Metabolism	K09101 Carbohydrate metabolism	K00051 Fructose and mannose metabolism [PATH:ko00051]		GH26	Glyco_hydro_26	0	19817000
B1.1_TRINITY_DN26990_c0_g1_i1.p1	K14698	irtA, ybtP; ATP-binding cassette, subfamily B, bacterial IrtA/YbtP [EC:7.-.-.-]	K09130 Environmental Information Processing	K09131 Membrane transport	K02010 ABC transporters [PATH:ko02010]			ABC_6TM_exporters	40680000	0	0
B1.1_TRINITY_DN26999_c0_g1_i1.p1	K01694	TRP; tryptophan synthase [EC:4.2.1.20]	K09100 Metabolism	K09105 Amino acid metabolism	K00260 Glycine, serine and threonine metabolism [PATH:ko00260]			trpA	1441900	364360	0.252694
B1.1_TRINITY_DN27_c0_g2_i4.p1	K01218	gmuG; mannan endo-1,4-beta-mannosidase [EC:3.2.1.78]	K09100 Metabolism	K09101 Carbohydrate metabolism	K00051 Fructose and mannose metabolism [PATH:ko00051]	CBM_10	GH26	Glyco_hydro_26	22696800	2760530000	121.626
B1.1_TRINITY_DN27_c0_g2_i5.p1	K01218	gmuG; mannan endo-1,4-beta-mannosidase [EC:3.2.1.78]	K09100 Metabolism	K09101 Carbohydrate metabolism	K00051 Fructose and mannose metabolism [PATH:ko00051]	CBM_10	GH26+fungi_doc	Glyco_hydro_26	0	100080000
B1.1_TRINITY_DN27_c0_g3_i1.p1	K01179	E3.2.1.4; endoglucanase [EC:3.2.1.4]	K09100 Metabolism	K09101 Carbohydrate metabolism	K00500 Starch and sucrose metabolism [PATH:ko00500]			Glyco_hydro_9	0	139530000
B1.1_TRINITY_DN27_c0_g3_i3.p1	K01179	E3.2.1.4; endoglucanase [EC:3.2.1.4]	K09100 Metabolism	K09101 Carbohydrate metabolism	K00500 Starch and sucrose metabolism [PATH:ko00500]		GH9	Glyco_hydro_9	50184000	505450000	10.0719
B1.1_TRINITY_DN27_c0_g4_i1.p1	K01179	E3.2.1.4; endoglucanase [EC:3.2.1.4]	K09100 Metabolism	K09101 Carbohydrate metabolism	K00500 Starch and sucrose metabolism [PATH:ko00500]	CBM_10		Glyco_hydro_9	0	16583000
B1.1_TRINITY_DN27_c1_g1_i11.p1	K01179	E3.2.1.4; endoglucanase [EC:3.2.1.4]	K09100 Metabolism	K09101 Carbohydrate metabolism	K00500 Starch and sucrose metabolism [PATH:ko00500]	CBM_10	GH9+fungi_doc	Glyco_hydro_9	0	1178768000
B1.1_TRINITY_DN27_c1_g1_i12.p1	K01179	E3.2.1.4; endoglucanase [EC:3.2.1.4]	K09100 Metabolism	K09101 Carbohydrate metabolism	K00500 Starch and sucrose metabolism [PATH:ko00500]	CBM_10	GH9	Glyco_hydro_9	3760400	5475010000	1455.96
B1.1_TRINITY_DN27_c1_g1_i14.p1	K01179	E3.2.1.4; endoglucanase [EC:3.2.1.4]	K09100 Metabolism	K09101 Carbohydrate metabolism	K00500 Starch and sucrose metabolism [PATH:ko00500]	CBM_10	GH9	Glyco_hydro_9	0	2.03079e+09
B1.1_TRINITY_DN27_c1_g1_i6.p1	K01179	E3.2.1.4; endoglucanase [EC:3.2.1.4]	K09100 Metabolism	K09101 Carbohydrate metabolism	K00500 Starch and sucrose metabolism [PATH:ko00500]	CBM_10	GH9+fungi_doc	Glyco_hydro_9	0	200300000
B1.1_TRINITY_DN27_c1_g1_i6.p2									9926700	0	0
B1.1_TRINITY_DN27_c1_g2_i1.p1						CBM_10			0	1.0465e+09
B1.1_TRINITY_DN27_c1_g3_i1.p1	K19668	CBH2, cbhA; cellulose 1,4-beta-cellobiosidase [EC:3.2.1.91]	K09100 Metabolism	K09101 Carbohydrate metabolism	K00500 Starch and sucrose metabolism [PATH:ko00500]	CBM_10	GH6+fungi_doc	Glyco_hydro_6	16053900	9.752e+09	607.454
B1.1_TRINITY_DN27_c1_g3_i2.p1	K19668	CBH2, cbhA; cellulose 1,4-beta-cellobiosidase [EC:3.2.1.91]	K09100 Metabolism	K09101 Carbohydrate metabolism	K00500 Starch and sucrose metabolism [PATH:ko00500]	CBM_10	GH6+fungi_doc	Glyco_hydro_6	0	218332800
B1.1_TRINITY_DN2700_c3_g1_i1.p1									0	957420
B1.1_TRINITY_DN2701_c2_g1_i1.p1	K14848	RRB1, GRWD1; ribosome assembly protein RRB1	K09180 Brite Hierarchies	K09182 Protein families: genetic information processing	K03009 Ribosome biogenesis [BR:ko03009]			WD40	20737300	0	0
B1.1_TRINITY_DN27018_c0_g1_i1.p1									18620000	0	0
B1.1_TRINITY_DN27020_c0_g1_i1.p1	K10356	MYO1; myosin I	K09160 Human Diseases	K09171 Infectious disease: bacterial	K05130 Pathogenic Escherichia coli infection [PATH:ko05130]			MYSc_Myo1	5887200	0	0
B1.1_TRINITY_DN2703_c0_g1_i1.p1	K13100	CWC22; pre-mRNA-splicing factor CWC22	K09180 Brite Hierarchies	K09182 Protein families: genetic information processing	K03041 Spliceosome [BR:ko03041]			MIF4G	24585000	0	0
B1.1_TRINITY_DN2704_c0_g1_i3.p1	K00615	E2.2.1.1, tktA, tktB; transketolase [EC:2.2.1.1]	K09100 Metabolism	K09101 Carbohydrate metabolism	K00030 Pentose phosphate pathway [PATH:ko00030]			TktA	683830000	256149000	0.37458
B1.1_TRINITY_DN27049_c0_g1_i1.p1									15336100	36156000	2.35757
B1.1_TRINITY_DN27060_c0_g1_i1.p1									67851000	2584700	0.0380938
B1.1_TRINITY_DN27066_c0_g1_i1.p1								FabG2	20364000	0	0
B1.1_TRINITY_DN2707_c0_g1_i1.p1								DUF1769	1125500	7576700	6.73185
B1.1_TRINITY_DN27086_c0_g1_i1.p1									103567000	3174500	0.0306517
B1.1_TRINITY_DN271_c0_g1_i2.p1									2955300	4437400	1.50151
B1.1_TRINITY_DN2710_c1_g1_i1.p1									10121500	0	0
B1.1_TRINITY_DN27119_c0_g1_i1.p1	K22539	PLY; pectate lyase [EC:4.2.2.2]	K09100 Metabolism	K09101 Carbohydrate metabolism	K00040 Pentose and glucuronate interconversions [PATH:ko00040]		PL3_2	Pectate_lyase	9580300	14685000	1.53283
B1.1_TRINITY_DN2715_c0_g1_i2.p1								DPBB_RlpA_EXP_N-like	0	156178000
B1.1_TRINITY_DN27156_c0_g1_i1.p1									199226000	0	0
B1.1_TRINITY_DN27177_c0_g1_i1.p1									38100000	0	0
B1.1_TRINITY_DN2718_c0_g1_i3.p1	K10599	PRPF19, PRP19; pre-mRNA-processing factor 19 [EC:2.3.2.27]	K09120 Genetic Information Processing	K09121 Transcription	K03040 Spliceosome [PATH:ko03040]			WD40	136855000	6051600	0.0442191
B1.1_TRINITY_DN2718_c0_g2_i1.p1	K01881	PARS, proS; prolyl-tRNA synthetase [EC:6.1.1.15]	K09120 Genetic Information Processing	K09122 Translation	K00970 Aminoacyl-tRNA biosynthesis [PATH:ko00970]			proS_fam_I	979780000	19198290	0.0195945
B1.1_TRINITY_DN272_c0_g2_i2.p1	K01728	pel; pectate lyase [EC:4.2.2.2]	K09100 Metabolism	K09101 Carbohydrate metabolism	K00040 Pentose and glucuronate interconversions [PATH:ko00040]		PL1_6	PelB	255332000	1211140000	4.74339
B1.1_TRINITY_DN272_c8_g1_i1.p1									4922700	0	0
B1.1_TRINITY_DN2720_c1_g1_i1.p1	K01663	HIS7; imidazole glycerol-phosphate synthase [EC:4.3.2.10]	K09100 Metabolism	K09105 Amino acid metabolism	K00340 Histidine metabolism [PATH:ko00340]			PLN02617	392690000	263378000	0.670702
B1.1_TRINITY_DN2723_c0_g1_i5.p1	K02183	CALM; calmodulin	K09130 Environmental Information Processing	K09132 Signal transduction	K04016 MAPK signaling pathway - plant [PATH:ko04016]			PTZ00184	481530000	284670000	0.591178
B1.1_TRINITY_DN27244_c0_g1_i1.p1									1177300	0	0
B1.1_TRINITY_DN27300_c0_g1_i1.p1									72932000	1339300	0.0183637
B1.1_TRINITY_DN27309_c0_g1_i1.p1									0	479890
B1.1_TRINITY_DN27384_c0_g1_i1.p1									1870440	0	0
B1.1_TRINITY_DN2740_c0_g1_i1.p1	K02154	ATPeV0A, ATP6N; V-type H+-transporting ATPase subunit a	K09100 Metabolism	K09102 Energy metabolism	K00190 Oxidative phosphorylation [PATH:ko00190]			V_ATPase_I	18339000	0	0
B1.1_TRINITY_DN2741_c0_g1_i1.p1	K08776	NPEPPS; puromycin-sensitive aminopeptidase [EC:3.4.11.14]	K09180 Brite Hierarchies	K09181 Protein families: metabolism	K01002 Peptidases and inhibitors [BR:ko01002]			M1_APN-Q_like	85432000	219511000	2.56942
B1.1_TRINITY_DN2741_c0_g1_i3.p1	K13721	APE2; aminopeptidase 2 [EC:3.4.11.-]	K09180 Brite Hierarchies	K09181 Protein families: metabolism	K01002 Peptidases and inhibitors [BR:ko01002]			M1_APN-Q_like	209170000	541840000	2.59043
B1.1_TRINITY_DN2741_c1_g1_i1.p1									2195000	0	0
B1.1_TRINITY_DN2741_c1_g2_i1.p1									0	2362300
B1.1_TRINITY_DN27425_c0_g1_i1.p1	K22539	PLY; pectate lyase [EC:4.2.2.2]	K09100 Metabolism	K09101 Carbohydrate metabolism	K00040 Pentose and glucuronate interconversions [PATH:ko00040]		PL3_2	Pectate_lyase	291491000	876220000	3.00599
B1.1_TRINITY_DN2744_c0_g2_i1.p1								PP2Cc	6893700	0	0
B1.1_TRINITY_DN27451_c0_g1_i1.p1									38539000	0	0
B1.1_TRINITY_DN27453_c0_g1_i1.p1									12017100	0	0
B1.1_TRINITY_DN276_c1_g1_i1.p1	K04393	CDC42; cell division control protein 42	K09130 Environmental Information Processing	K09132 Signal transduction	K04010 MAPK signaling pathway [PATH:ko04010]			Cdc42	12654600	1718300	0.135785
B1.1_TRINITY_DN27644_c0_g1_i1.p1	K11373	ELP1, IKI3, IKBKAP; elongator complex protein 1	K09180 Brite Hierarchies	K09182 Protein families: genetic information processing	K03016 Transfer RNA biogenesis [BR:ko03016]			COG5290	4135000	0	0
B1.1_TRINITY_DN2766_c0_g1_i1.p1	K09568	FKBP1; FK506-binding protein 1 [EC:5.2.1.8]	K09180 Brite Hierarchies	K09182 Protein families: genetic information processing	K03110 Chaperones and folding catalysts [BR:ko03110]			FkpA	232370000	2781100	0.0119684
B1.1_TRINITY_DN2766_c2_g1_i1.p1	K08176	PHO84; MFS transporter, PHS family, inorganic phosphate transporter	K09180 Brite Hierarchies	K09183 Protein families: signaling and cellular processes	K02000 Transporters [BR:ko02000]			2A0109	101517000	0	0
B1.1_TRINITY_DN2768_c0_g1_i3.p1	K03004	RPA43, POLR1F, TWISTNB; DNA-directed RNA polymerase I subunit RPA43	K09120 Genetic Information Processing	K09121 Transcription	K03020 RNA polymerase [PATH:ko03020]			RNAP_I_Rpa43_N	4020900	1736700	0.431918
B1.1_TRINITY_DN2769_c0_g1_i10.p1	K05546	GANAB; mannosyl-oligosaccharide alpha-1,3-glucosidase [EC:3.2.1.207]	K09100 Metabolism	K09107 Glycan biosynthesis and metabolism	K00510 N-Glycan biosynthesis [PATH:ko00510]		GH31_1	GH31_GANC_GANAB_alpha	65577000	7774500	0.118555
B1.1_TRINITY_DN2769_c1_g1_i2.p1	K01181	E3.2.1.8, xynA; endo-1,4-beta-xylanase [EC:3.2.1.8]	K09180 Brite Hierarchies	K09191 Unclassified: metabolism	K99980 Enzymes with EC numbers		GH10	Glyco_hydro_10	0	81637500
B1.1_TRINITY_DN277_c0_g1_i2.p1	K08493	VTI1; vesicle transport through interaction with t-SNAREs 1	K09120 Genetic Information Processing	K09123 Folding, sorting and degradation	K04130 SNARE interactions in vesicular transport [PATH:ko04130]			SNARE_Vti1	0	446030
B1.1_TRINITY_DN2776_c0_g2_i2.p1	K07904	RAB11A; Ras-related protein Rab-11A	K09140 Cellular Processes	K09141 Transport and catabolism	K04144 Endocytosis [PATH:ko04144]			Rab11_like	309770000	1323600	0.00427285
B1.1_TRINITY_DN2776_c0_g3_i3.p1									61164000	5884900	0.0962151
B1.1_TRINITY_DN27761_c0_g1_i1.p1									0	3433800
B1.1_TRINITY_DN278_c0_g1_i10.p1	K03064	PSMC6, RPT4; 26S proteasome regulatory subunit T4	K09120 Genetic Information Processing	K09123 Folding, sorting and degradation	K03050 Proteasome [PATH:ko03050]			RPT1	0	14631000
B1.1_TRINITY_DN278_c0_g1_i4.p1	K03064	PSMC6, RPT4; 26S proteasome regulatory subunit T4	K09120 Genetic Information Processing	K09123 Folding, sorting and degradation	K03050 Proteasome [PATH:ko03050]			RPT1	286280000	17537000	0.0612582
B1.1_TRINITY_DN278_c0_g3_i3.p1	K03064	PSMC6, RPT4; 26S proteasome regulatory subunit T4	K09120 Genetic Information Processing	K09123 Folding, sorting and degradation	K03050 Proteasome [PATH:ko03050]			RPT1	75756000	8509400	0.112326
B1.1_TRINITY_DN2783_c0_g1_i1.p1								7tmC_GPR158-like	1173000	1523600	1.29889
B1.1_TRINITY_DN2792_c0_g1_i2.p1	K17919	SNX4; sorting nexin-4	K09140 Cellular Processes	K09141 Transport and catabolism	K04144 Endocytosis [PATH:ko04144]				5838500	0	0
B1.1_TRINITY_DN2793_c0_g1_i7.p1	K20792	NAA15_16; N-alpha-acetyltransferase 15/16, NatA auxiliary subunit	K09180 Brite Hierarchies	K09182 Protein families: genetic information processing	K03036 Chromosome and associated proteins [BR:ko03036]			NARP1	59628000	0	0
B1.1_TRINITY_DN2797_c1_g1_i1.p1								DPBB_RlpA_EXP_N-like	0	662760000
B1.1_TRINITY_DN28_c1_g1_i2.p1									8742200	0	0
B1.1_TRINITY_DN2807_c1_g1_i2.p1	K05853	ATP2A; P-type Ca2+ transporter type 2A [EC:7.2.2.10]	K09130 Environmental Information Processing	K09132 Signal transduction	K04020 Calcium signaling pathway [PATH:ko04020]			P-type_ATPase_SERCA	67884000	0	0
B1.1_TRINITY_DN2818_c0_g2_i5.p1	K01074	PPT; palmitoyl-protein thioesterase [EC:3.1.2.22]	K09100 Metabolism	K09103 Lipid metabolism	K00062 Fatty acid elongation [PATH:ko00062]			Palm_thioest	0	1827300
B1.1_TRINITY_DN2819_c1_g1_i1.p1	K06268	PPP3R, CNB; serine/threonine-protein phosphatase 2B regulatory subunit	K09130 Environmental Information Processing	K09132 Signal transduction	K04010 MAPK signaling pathway [PATH:ko04010]			FRQ1	66842000	19987000	0.299019
B1.1_TRINITY_DN282_c1_g3_i1.p1	K07126	K07126; uncharacterized protein	K09180 Brite Hierarchies	K09194 Poorly characterized	K99997 Function unknown			TPR	1576260	0	0
B1.1_TRINITY_DN282_c1_g5_i2.p1	K08794	CAMK1; calcium/calmodulin-dependent protein kinase I [EC:2.7.11.17]	K09130 Environmental Information Processing	K09132 Signal transduction	K04020 Calcium signaling pathway [PATH:ko04020]			STKc_CAMK	33856000	0	0
B1.1_TRINITY_DN2820_c2_g1_i2.p1	K02218	CSNK1, CKI; casein kinase 1 [EC:2.7.11.1]	K09130 Environmental Information Processing	K09132 Signal transduction	K04011 MAPK signaling pathway - yeast [PATH:ko04011]			STKc_CK1_fungal	0	2077600
B1.1_TRINITY_DN28208_c2_g1_i1.p1	K02889	RP-L21e, RPL21; large subunit ribosomal protein L21e	K09120 Genetic Information Processing	K09122 Translation	K03010 Ribosome [PATH:ko03010]			PTZ00189	1565690000	85192300	0.054412
B1.1_TRINITY_DN28220_c0_g1_i1.p1								Sortilin-Vps10	48141000	0	0
B1.1_TRINITY_DN28220_c0_g1_i1.p2								Sortilin-Vps10	8824700	4895200	0.554716
B1.1_TRINITY_DN28228_c1_g1_i1.p1	K02896	RP-L24e, RPL24; large subunit ribosomal protein L24e	K09120 Genetic Information Processing	K09122 Translation	K03010 Ribosome [PATH:ko03010]			Ribosomal_L24e	1086160000	64314000	0.0592123
B1.1_TRINITY_DN2823_c0_g1_i2.p1	K03263	EIF5A; translation initiation factor 5A	K09180 Brite Hierarchies	K09182 Protein families: genetic information processing	K03012 Translation factors [BR:ko03012]			PLN03107	2836900000	1151590000	0.405933
B1.1_TRINITY_DN28235_c0_g1_i1.p2							GH45	Glyco_hydro_45	0	3373400
B1.1_TRINITY_DN28245_c0_g1_i1.p1							GH44	Glyco_hydro_44	18103000	1.09709e+09	60.6028
B1.1_TRINITY_DN2825_c0_g1_i9.p1	K07359	CAMKK2; calcium/calmodulin-dependent protein kinase kinase 2 [EC:2.7.11.17]	K09130 Environmental Information Processing	K09132 Signal transduction	K04152 AMPK signaling pathway [PATH:ko04152]			STKc_LKB1_CaMKK	35034500	1051900	0.0300247
B1.1_TRINITY_DN28251_c0_g1_i1.p1	K12828	SF3B1, SAP155; splicing factor 3B subunit 1	K09120 Genetic Information Processing	K09121 Transcription	K03040 Spliceosome [PATH:ko03040]			SF3b1	6888100	0	0
B1.1_TRINITY_DN28257_c0_g1_i1.p1	K18195	RGL4, rhiE; rhamnogalacturonan endolyase [EC:4.2.2.23]	K09180 Brite Hierarchies	K09191 Unclassified: metabolism	K99980 Enzymes with EC numbers		PL4+	RGL4_N	154976000	513591000	3.314
B1.1_TRINITY_DN2826_c0_g1_i1.p1	K06944	K06944; uncharacterized protein	K09180 Brite Hierarchies	K09194 Poorly characterized	K99997 Function unknown			Rbg1	26990000	0	0
B1.1_TRINITY_DN2826_c1_g1_i1.p1	K06669	SMC3, CSPG6; structural maintenance of chromosome 3 (chondroitin sulfate proteoglycan 6)	K09140 Cellular Processes	K09143 Cell growth and death	K04110 Cell cycle [PATH:ko04110]				8649600	0	0
B1.1_TRINITY_DN2827_c0_g1_i9.p1								BioF	52173000	0	0
B1.1_TRINITY_DN28270_c0_g1_i1.p1									35881000	2394800	0.0667428
B1.1_TRINITY_DN28272_c0_g1_i1.p1								PHA03100	10459400	0	0
B1.1_TRINITY_DN28275_c0_g1_i1.p1									35733000	1610600	0.0450732
B1.1_TRINITY_DN28276_c0_g1_i1.p1									0	115580000
B1.1_TRINITY_DN28314_c0_g1_i1.p1	K14729	FOX2; multifunctional beta-oxidation protein [EC:4.2.1.- 1.1.1.-]	K09100 Metabolism	K09101 Carbohydrate metabolism	K00640 Propanoate metabolism [PATH:ko00640]			hydroxyacyl-CoA-like_DH_SDR_c-like	174908000	0	0
B1.1_TRINITY_DN28317_c0_g1_i1.p1								FabB	40791000	0	0
B1.1_TRINITY_DN2832_c0_g1_i2.p1	K03038	PSMD7, RPN8; 26S proteasome regulatory subunit N8	K09120 Genetic Information Processing	K09123 Folding, sorting and degradation	K03050 Proteasome [PATH:ko03050]			MPN_RPN7_8	313840000	17951000	0.0571979
B1.1_TRINITY_DN28343_c0_g1_i1.p1	K02955	RP-S14e, RPS14; small subunit ribosomal protein S14e	K09120 Genetic Information Processing	K09122 Translation	K03010 Ribosome [PATH:ko03010]			PTZ00129	43947000	0	0
B1.1_TRINITY_DN2835_c1_g1_i1.p1									3004900	46560000	15.4947
B1.1_TRINITY_DN28352_c0_g1_i1.p1									15302300	1908700	0.124733
B1.1_TRINITY_DN28360_c0_g1_i1.p1								C1_ScPKC1-like_rpt2	5124400	0	0
B1.1_TRINITY_DN28393_c0_g1_i1.p1									9331000	0	0
B1.1_TRINITY_DN284_c0_g1_i4.p1								bHLHzip_USF_MITF	4138400	0	0
B1.1_TRINITY_DN2840_c1_g1_i2.p1									5163300	0	0
B1.1_TRINITY_DN28403_c0_g1_i1.p1	K15620	GOLPH3, GPP34; golgi phosphoprotein 3	K09180 Brite Hierarchies	K09182 Protein families: genetic information processing	K04131 Membrane trafficking [BR:ko04131]			GPP34	6155000	0	0
B1.1_TRINITY_DN2841_c0_g1_i1.p1	K01179	E3.2.1.4; endoglucanase [EC:3.2.1.4]	K09100 Metabolism	K09101 Carbohydrate metabolism	K00500 Starch and sucrose metabolism [PATH:ko00500]		GH9	Glyco_hydro_9	0	126815000
B1.1_TRINITY_DN28456_c0_g1_i1.p1									3008600	0	0
B1.1_TRINITY_DN28459_c0_g1_i1.p1	K11373	ELP1, IKI3, IKBKAP; elongator complex protein 1	K09180 Brite Hierarchies	K09182 Protein families: genetic information processing	K03016 Transfer RNA biogenesis [BR:ko03016]			IKI3	1352100	0	0
B1.1_TRINITY_DN2846_c2_g1_i1.p1	K01102	PDP; pyruvate dehydrogenase phosphatase [EC:3.1.3.43]	K09180 Brite Hierarchies	K09181 Protein families: metabolism	K01009 Protein phosphatases and associated proteins [BR:ko01009]				11986900	0	0
B1.1_TRINITY_DN2847_c1_g2_i1.p1	K00820	glmS, GFPT; glutamine---fructose-6-phosphate transaminase (isomerizing) [EC:2.6.1.16]	K09100 Metabolism	K09101 Carbohydrate metabolism	K00520 Amino sugar and nucleotide sugar metabolism [PATH:ko00520]			PLN02981	7.4412e+09	654250000	0.0879226
B1.1_TRINITY_DN28471_c0_g1_i1.p1	K03006	RPB1, POLR2A; DNA-directed RNA polymerase II subunit RPB1 [EC:2.7.7.6]	K09120 Genetic Information Processing	K09121 Transcription	K03020 RNA polymerase [PATH:ko03020]			RNAP_II_RPB1_N	6759400	0	0
B1.1_TRINITY_DN2851_c0_g2_i1.p1	K23038	ZC3H14; zinc finger CCCH domain-containing protein 14	K09180 Brite Hierarchies	K09182 Protein families: genetic information processing	K03019 Messenger RNA biogenesis [BR:ko03019]				34156000	884550	0.0258974
B1.1_TRINITY_DN2854_c0_g2_i1.p1							CE4	CE4_ClCDA_like	28065400	956100000	34.0669
B1.1_TRINITY_DN28550_c0_g1_i1.p1	K14521	NAT10, KRE33; N-acetyltransferase 10 [EC:2.3.1.-]	K09120 Genetic Information Processing	K09122 Translation	K03008 Ribosome biogenesis in eukaryotes [PATH:ko03008]			GNAT_acetyltr_2	33255000	0	0
B1.1_TRINITY_DN28574_c0_g1_i1.p1	K12854	SNRNP200, BRR2; pre-mRNA-splicing helicase BRR2 [EC:3.6.4.13]	K09120 Genetic Information Processing	K09121 Transcription	K03040 Spliceosome [PATH:ko03040]			DEXHc_Brr2_1	24036000	0	0
B1.1_TRINITY_DN2860_c3_g1_i1.p1									4551100	0	0
B1.1_TRINITY_DN28626_c0_g1_i1.p1									59514000	593810000	9.97765
B1.1_TRINITY_DN2864_c4_g1_i1.p1									499110	0	0
B1.1_TRINITY_DN28643_c0_g1_i1.p1									17031000	0	0
B1.1_TRINITY_DN2868_c0_g1_i4.p1	K15029	EIF3L; translation initiation factor 3 subunit L	K09180 Brite Hierarchies	K09182 Protein families: genetic information processing	K03012 Translation factors [BR:ko03012]			Paf67	342850000	6530900	0.0190489
B1.1_TRINITY_DN2870_c0_g1_i2.p1	K01802	E5.2.1.8; peptidylprolyl isomerase [EC:5.2.1.8]	K09180 Brite Hierarchies	K09191 Unclassified: metabolism	K99980 Enzymes with EC numbers			cyclophilin_ABH_like	162265000	117934000	0.726799
B1.1_TRINITY_DN2870_c2_g1_i2.p1	K03942	NDUFV1; NADH dehydrogenase (ubiquinone) flavoprotein 1 [EC:7.1.1.2]	K09100 Metabolism	K09102 Energy metabolism	K00190 Oxidative phosphorylation [PATH:ko00190]			PRK13596	2.5539e+09	1545470000	0.605141
B1.1_TRINITY_DN2870_c6_g1_i1.p1									2467200	0	0
B1.1_TRINITY_DN28700_c0_g1_i1.p1									2585300	1042900	0.403396
B1.1_TRINITY_DN2872_c10_g1_i1.p1	K06943	NOG1; nucleolar GTP-binding protein	K09120 Genetic Information Processing	K09122 Translation	K03008 Ribosome biogenesis in eukaryotes [PATH:ko03008]			Nog1	23482000	0	0
B1.1_TRINITY_DN28722_c0_g1_i1.p1	K01952	PFAS, purL; phosphoribosylformylglycinamidine synthase [EC:6.3.5.3]	K09100 Metabolism	K09104 Nucleotide metabolism	K00230 Purine metabolism [PATH:ko00230]			PRK05297	5693900	0	0
B1.1_TRINITY_DN28755_c0_g1_i1.p1									0	3079500
B1.1_TRINITY_DN28803_c0_g1_i1.p1								PKS	30473000	59979200	1.96827
B1.1_TRINITY_DN28807_c0_g1_i1.p1									2938100	0	0
B1.1_TRINITY_DN28809_c0_g1_i1.p1								GH16_CCF	0	74658400
B1.1_TRINITY_DN2882_c1_g1_i6.p1	K00772	mtaP, MTAP; 5'-methylthioadenosine phosphorylase [EC:2.4.2.28]	K09100 Metabolism	K09105 Amino acid metabolism	K00270 Cysteine and methionine metabolism [PATH:ko00270]			MTAP_SsMTAPII_like_MTIP	172077000	1004500000	5.8375
B1.1_TRINITY_DN2882_c4_g1_i1.p1									31775000	81078000	2.55163
B1.1_TRINITY_DN28827_c0_g1_i1.p1	K00698	CHS1; chitin synthase [EC:2.4.1.16]	K09100 Metabolism	K09101 Carbohydrate metabolism	K00520 Amino sugar and nucleotide sugar metabolism [PATH:ko00520]				8486400	0	0
B1.1_TRINITY_DN28848_c0_g1_i1.p1									624530	0	0
B1.1_TRINITY_DN28897_c0_g1_i1.p1									2959700	4969800	1.67916
B1.1_TRINITY_DN28937_c0_g1_i1.p1									1746800	0	0
B1.1_TRINITY_DN2897_c0_g2_i1.p1	K18342	OTUD6; OTU domain-containing protein 6 [EC:3.4.19.12]	K09180 Brite Hierarchies	K09182 Protein families: genetic information processing	K04121 Ubiquitin system [BR:ko04121]			OTU_OTUD6-like	7381300	3123700	0.423191
B1.1_TRINITY_DN29003_c0_g1_i1.p1	K00228	CPOX, hemF; coproporphyrinogen III oxidase [EC:1.3.3.3]	K09100 Metabolism	K09108 Metabolism of cofactors and vitamins	K00860 Porphyrin and chlorophyll metabolism [PATH:ko00860]			Coprogen_oxidas	4709800	0	0
B1.1_TRINITY_DN29013_c0_g1_i1.p1									18520600	0	0
B1.1_TRINITY_DN2905_c0_g2_i1.p1	K19355	MAN; mannan endo-1,4-beta-mannosidase [EC:3.2.1.78]	K09100 Metabolism	K09101 Carbohydrate metabolism	K00051 Fructose and mannose metabolism [PATH:ko00051]		GH5_7	COG3934	14220000	6150600	0.432532
B1.1_TRINITY_DN2905_c0_g3_i1.p1	K19355	MAN; mannan endo-1,4-beta-mannosidase [EC:3.2.1.78]	K09100 Metabolism	K09101 Carbohydrate metabolism	K00051 Fructose and mannose metabolism [PATH:ko00051]		GH5_7	COG3934	156314000	296585000	1.89737
B1.1_TRINITY_DN2905_c0_g3_i2.p1	K19355	MAN; mannan endo-1,4-beta-mannosidase [EC:3.2.1.78]	K09100 Metabolism	K09101 Carbohydrate metabolism	K00051 Fructose and mannose metabolism [PATH:ko00051]		GH5_7	COG3934	4867900000	2.12535e+09	0.436605
B1.1_TRINITY_DN2907_c2_g1_i1.p1									2383100	1182400	0.49616
B1.1_TRINITY_DN2908_c0_g1_i3.p1	K06944	K06944; uncharacterized protein	K09180 Brite Hierarchies	K09194 Poorly characterized	K99997 Function unknown			Rbg1	43775000	0	0
B1.1_TRINITY_DN291_c0_g1_i1.p1	K02728	PSMA4; 20S proteasome subunit alpha 3 [EC:3.4.25.1]	K09120 Genetic Information Processing	K09123 Folding, sorting and degradation	K03050 Proteasome [PATH:ko03050]			proteasome_alpha_type_4	247390000	376590000	1.52225
B1.1_TRINITY_DN29111_c0_g1_i1.p1								COG5638	3217700	0	0
B1.1_TRINITY_DN29116_c0_g1_i1.p1									1350300	4105300	3.04029
B1.1_TRINITY_DN2912_c1_g1_i1.p1									5956100	1492200	0.250533
B1.1_TRINITY_DN2915_c1_g2_i1.p1									0	999250
B1.1_TRINITY_DN2918_c1_g1_i1.p1	K12195	CHMP6, VPS20; charged multivesicular body protein 6	K09140 Cellular Processes	K09141 Transport and catabolism	K04144 Endocytosis [PATH:ko04144]			Snf7	20550900	6436920	0.313218
B1.1_TRINITY_DN2926_c0_g4_i1.p1	K20523	SH3YL1; SH3 domain-containing YSC84-like protein 1	K09180 Brite Hierarchies	K09182 Protein families: genetic information processing	K04131 Membrane trafficking [BR:ko04131]			SYLF_SH3YL1_like	223780000	35227000	0.157418
B1.1_TRINITY_DN2927_c0_g2_i10.p1	K20526	TAGLN; transgelin	K09180 Brite Hierarchies	K09182 Protein families: genetic information processing	K04131 Membrane trafficking [BR:ko04131]			CH_SF	25364000	21408200	0.844039
B1.1_TRINITY_DN2927_c0_g2_i15.p1									0	7665900
B1.1_TRINITY_DN2927_c1_g1_i4.p1	K11593	ELF2C, AGO; eukaryotic translation initiation factor 2C	K09150 Organismal Systems	K09158 Development and regeneration				ArgoN	21885000	4709500	0.215193
B1.1_TRINITY_DN293_c0_g2_i1.p1							CE4	CE4_ClCDA_like	0	30429000
B1.1_TRINITY_DN293_c2_g1_i1.p1	K20301	TRAPPC2, TRS20; trafficking protein particle complex subunit 2	K09180 Brite Hierarchies	K09182 Protein families: genetic information processing	K04131 Membrane trafficking [BR:ko04131]			TRAPPC2_sedlin	19089200	0	0
B1.1_TRINITY_DN293_c3_g1_i1.p1							CE4	CE4_ClCDA_like	63296000	640360000	10.1169
B1.1_TRINITY_DN2930_c0_g1_i1.p1	K00602	purH; phosphoribosylaminoimidazolecarboxamide formyltransferase / IMP cyclohydrolase [EC:2.1.2.3 3.5.4.10]	K09100 Metabolism	K09104 Nucleotide metabolism	K00230 Purine metabolism [PATH:ko00230]			PRK07106	5.8475e+09	4.4389e+09	0.759111
B1.1_TRINITY_DN2930_c2_g1_i4.p1								S49_SppA_67K_type	2379300	2609600	1.09679
B1.1_TRINITY_DN2932_c2_g1_i1.p1	K01280	TPP2; tripeptidyl-peptidase II [EC:3.4.14.10]	K09180 Brite Hierarchies	K09181 Protein families: metabolism	K01002 Peptidases and inhibitors [BR:ko01002]			Peptidases_S8_Tripeptidyl_Aminopeptidase_II	19961000	0	0
B1.1_TRINITY_DN2932_c3_g1_i1.p1								YdfG	2554200	0	0
B1.1_TRINITY_DN2935_c0_g2_i1.p1								VTC1	17016800	0	0
B1.1_TRINITY_DN2935_c2_g1_i1.p1									0	56771000
B1.1_TRINITY_DN2945_c0_g1_i3.p1	K15451	PPM2, LCMT2, TYW4; tRNA wybutosine-synthesizing protein 4 [EC:2.1.1.290 2.3.1.231]	K09180 Brite Hierarchies	K09182 Protein families: genetic information processing	K03016 Transfer RNA biogenesis [BR:ko03016]				57771000	0	0
B1.1_TRINITY_DN2947_c0_g1_i2.p1	K14768	UTP7, WDR46; U3 small nucleolar RNA-associated protein 7	K09180 Brite Hierarchies	K09182 Protein families: genetic information processing	K03009 Ribosome biogenesis [BR:ko03009]			BING4CT	7418600	0	0
B1.1_TRINITY_DN2948_c0_g1_i4.p1	K02900	RP-L27Ae, RPL27A; large subunit ribosomal protein L27Ae	K09120 Genetic Information Processing	K09122 Translation	K03010 Ribosome [PATH:ko03010]			PTZ00160	876290000	21983700	0.0250872
B1.1_TRINITY_DN2958_c6_g1_i1.p1									775730	0	0
B1.1_TRINITY_DN296_c0_g1_i1.p1									0	4270500
B1.1_TRINITY_DN296_c0_g2_i1.p1	K14830	MAK11, PAK1IP1; protein MAK11	K09180 Brite Hierarchies	K09182 Protein families: genetic information processing	K03009 Ribosome biogenesis [BR:ko03009]			WD40	12993500	0	0
B1.1_TRINITY_DN2975_c0_g1_i3.p1	K03593	mrp, NUBPL; ATP-binding protein involved in chromosome partitioning	K09180 Brite Hierarchies	K09182 Protein families: genetic information processing	K03036 Chromosome and associated proteins [BR:ko03036]			ParA	152330000	0	0
B1.1_TRINITY_DN2976_c0_g1_i4.p1								TPR	2226500	0	0
B1.1_TRINITY_DN2980_c0_g1_i1.p1	K15272	SLC35A1_2_3; solute carrier family 35 (UDP-sugar transporter), member A1/2/3	K09180 Brite Hierarchies	K09183 Protein families: signaling and cellular processes	K02000 Transporters [BR:ko02000]			Nuc_sug_transp	3395800	0	0
B1.1_TRINITY_DN29805_c2_g1_i1.p1	K02969	RP-S20e, RPS20; small subunit ribosomal protein S20e	K09120 Genetic Information Processing	K09122 Translation	K03010 Ribosome [PATH:ko03010]			PTZ00039	752180000	339556000	0.451429
B1.1_TRINITY_DN29813_c0_g1_i1.p1									19026700	691790	0.0363589
B1.1_TRINITY_DN2982_c5_g1_i1.p1									12799500	0	0
B1.1_TRINITY_DN29823_c4_g2_i1.p1	K02947	RP-S10e, RPS10; small subunit ribosomal protein S10e	K09120 Genetic Information Processing	K09122 Translation	K03010 Ribosome [PATH:ko03010]			S10_plectin	2.1152e+09	153721000	0.0726745
B1.1_TRINITY_DN2986_c1_g2_i2.p1	K00728	POMT, pmt; dolichyl-phosphate-mannose-protein mannosyltransferase [EC:2.4.1.109]	K09100 Metabolism	K09107 Glycan biosynthesis and metabolism	K00515 Mannose type O-glycan biosynthesis [PATH:ko00515]			PMT1	20083000	0	0
B1.1_TRINITY_DN29868_c0_g1_i1.p1	K20223	IPO7, RANBP7; importin-7	K09120 Genetic Information Processing	K09122 Translation	K03013 Nucleocytoplasmic transport [PATH:ko03013]			SXM1	5316100	0	0
B1.1_TRINITY_DN29869_c0_g1_i1.p1							CE2	Endoglucanase_E_like	0	298176000
B1.1_TRINITY_DN2988_c0_g1_i1.p1	K23708	SORBS2; sorbin and SH3 domain-containing protein 2	K09180 Brite Hierarchies	K09183 Protein families: signaling and cellular processes	K04990 Domain-containing proteins not elsewhere classified [BR:ko04990]			SH3_Sorbs_3	6598000	620260000	94.0073
B1.1_TRINITY_DN29888_c0_g1_i1.p1									800580	0	0
B1.1_TRINITY_DN299_c0_g1_i4.p1	K24315	TGFB1I1; transforming growth factor beta-1-induced transcript 1 protein	K09180 Brite Hierarchies	K09183 Protein families: signaling and cellular processes	K04990 Domain-containing proteins not elsewhere classified [BR:ko04990]			LIM	10655600	0	0
B1.1_TRINITY_DN299_c0_g1_i4.p3									535500	0	0
B1.1_TRINITY_DN299_c1_g2_i1.p1	K08956	AFG3; AFG3 family protein [EC:3.4.24.-]	K09160 Human Diseases	K09164 Neurodegenerative disease				FtsH_fam	4979200	0	0
B1.1_TRINITY_DN29903_c0_g1_i1.p2									3376600	0	0
B1.1_TRINITY_DN29922_c0_g1_i1.p1	K13024	PPIP5K, VIP; inositol-hexakisphosphate/diphosphoinositol-pentakisphosphate 1-kinase [EC:2.7.4.24]	K09130 Environmental Information Processing	K09132 Signal transduction	K04070 Phosphatidylinositol signaling system [PATH:ko04070]			His_Phos_2	4566700	0	0
B1.1_TRINITY_DN29927_c0_g1_i1.p1								KH-I_MUG60_like	31637000	0	0
B1.1_TRINITY_DN29929_c0_g1_i1.p1									0	7950900
B1.1_TRINITY_DN29933_c0_g1_i1.p1									41275000	0	0
B1.1_TRINITY_DN2995_c0_g1_i1.p1	K20222	IPO5, KPNB3, RANBP5; importin-5	K09120 Genetic Information Processing	K09122 Translation	K03013 Nucleocytoplasmic transport [PATH:ko03013]			Importin_rep_6	70303000	0	0
B1.1_TRINITY_DN2996_c1_g1_i1.p1	K20372	TBC1D20, GYP8; TBC1 domain family member 20	K09180 Brite Hierarchies	K09182 Protein families: genetic information processing	K04131 Membrane trafficking [BR:ko04131]			RabGAP-TBC	3522100	0	0
B1.1_TRINITY_DN29979_c0_g1_i1.p1									29532900	24328900	0.82379
B1.1_TRINITY_DN2998_c2_g1_i7.p1	K15500	PPP6R2, SAPS2; serine/threonine-protein phosphatase 6 regulatory subunit 2	K09180 Brite Hierarchies	K09181 Protein families: metabolism	K01009 Protein phosphatases and associated proteins [BR:ko01009]			SAPS	47092000	0	0
B1.1_TRINITY_DN3_c0_g1_i10.p1	K00656	E2.3.1.54, pflD; formate C-acetyltransferase [EC:2.3.1.54]	K09100 Metabolism	K09101 Carbohydrate metabolism	K00620 Pyruvate metabolism [PATH:ko00620]			PFL1	250189000	26308800	0.105156
B1.1_TRINITY_DN3_c0_g1_i11.p1	K00656	E2.3.1.54, pflD; formate C-acetyltransferase [EC:2.3.1.54]	K09100 Metabolism	K09101 Carbohydrate metabolism	K00620 Pyruvate metabolism [PATH:ko00620]			PFL1	6.876e+09	1259560000	0.183182
B1.1_TRINITY_DN3_c0_g1_i13.p1	K00656	E2.3.1.54, pflD; formate C-acetyltransferase [EC:2.3.1.54]	K09100 Metabolism	K09101 Carbohydrate metabolism	K00620 Pyruvate metabolism [PATH:ko00620]			PFL1	328580000	24554700	0.0747297
B1.1_TRINITY_DN3_c0_g1_i3.p1	K00656	E2.3.1.54, pflD; formate C-acetyltransferase [EC:2.3.1.54]	K09100 Metabolism	K09101 Carbohydrate metabolism	K00620 Pyruvate metabolism [PATH:ko00620]			PFL1	77509300	6660200	0.0859278
B1.1_TRINITY_DN3_c0_g1_i6.p1	K00656	E2.3.1.54, pflD; formate C-acetyltransferase [EC:2.3.1.54]	K09100 Metabolism	K09101 Carbohydrate metabolism	K00620 Pyruvate metabolism [PATH:ko00620]			PFL1	1070560000	183154000	0.171082
B1.1_TRINITY_DN3_c0_g2_i1.p1	K00656	E2.3.1.54, pflD; formate C-acetyltransferase [EC:2.3.1.54]	K09100 Metabolism	K09101 Carbohydrate metabolism	K00620 Pyruvate metabolism [PATH:ko00620]			PFL1	3.2774e+09	1002340000	0.305834
B1.1_TRINITY_DN3000_c2_g1_i2.p1	K12584	DCPS, DCS; m7GpppX diphosphatase [EC:3.6.1.59]	K09120 Genetic Information Processing	K09123 Folding, sorting and degradation	K03018 RNA degradation [PATH:ko03018]			COG5075	0	11482000
B1.1_TRINITY_DN3002_c0_g2_i4.p1	K14005	SEC31; protein transport protein SEC31	K09120 Genetic Information Processing	K09123 Folding, sorting and degradation	K04141 Protein processing in endoplasmic reticulum [PATH:ko04141]				177313000	37422000	0.211051
B1.1_TRINITY_DN3005_c0_g1_i3.p1	K16948	CDC12; cell division control protein 12	K09180 Brite Hierarchies	K09183 Protein families: signaling and cellular processes	K04812 Cytoskeleton proteins [BR:ko04812]			CDC3	326220000	16047900	0.0491935
B1.1_TRINITY_DN3006_c0_g1_i4.p1	K01392	THOP1; thimet oligopeptidase [EC:3.4.24.15]	K09150 Organismal Systems	K09152 Endocrine system				M3A_TOP	187102000	197723000	1.05677
B1.1_TRINITY_DN30060_c0_g1_i1.p1									1410600	0	0
B1.1_TRINITY_DN3007_c0_g1_i5.p1	K10365	CAPZB; capping protein (actin filament) muscle Z-line, beta	K09140 Cellular Processes	K09141 Transport and catabolism	K04144 Endocytosis [PATH:ko04144]			F_actin_cap_B	70487000	59537000	0.844652
B1.1_TRINITY_DN3010_c0_g1_i3.p1	K09550	PFDN4; prefoldin subunit 4	K09180 Brite Hierarchies	K09182 Protein families: genetic information processing	K03110 Chaperones and folding catalysts [BR:ko03110]				51905000	37635600	0.725086
B1.1_TRINITY_DN30103_c0_g1_i1.p1									582320	0	0
B1.1_TRINITY_DN30104_c0_g1_i1.p1									8946700	66243000	7.40418
B1.1_TRINITY_DN30109_c0_g1_i1.p1	K11262	ACACA; acetyl-CoA carboxylase / biotin carboxylase 1 [EC:6.4.1.2 6.3.4.14 2.1.3.15]	K09100 Metabolism	K09101 Carbohydrate metabolism	K00620 Pyruvate metabolism [PATH:ko00620]			Carboxyl_trans	116437000	4166960	0.0357872
B1.1_TRINITY_DN3012_c0_g1_i4.p1	K23905	PEF1; peflin	K09180 Brite Hierarchies	K09183 Protein families: signaling and cellular processes	K04990 Domain-containing proteins not elsewhere classified [BR:ko04990]			EFh_PEF_Group_I	365120000	9023800	0.0247146
B1.1_TRINITY_DN30143_c0_g1_i1.p1									24154100	0	0
B1.1_TRINITY_DN3016_c0_g4_i1.p1									1877600	0	0
B1.1_TRINITY_DN3016_c1_g1_i3.p1	K01870	IARS, ileS; isoleucyl-tRNA synthetase [EC:6.1.1.5]	K09120 Genetic Information Processing	K09122 Translation	K00970 Aminoacyl-tRNA biosynthesis [PATH:ko00970]			PLN02882	254610000	5431600	0.021333
B1.1_TRINITY_DN3018_c0_g1_i2.p1									72098000	4741900	0.0657702
B1.1_TRINITY_DN30191_c0_g1_i1.p1	K02925	RP-L3e, RPL3; large subunit ribosomal protein L3e	K09120 Genetic Information Processing	K09122 Translation	K03010 Ribosome [PATH:ko03010]			PTZ00103	504920000	0	0
B1.1_TRINITY_DN3020_c1_g1_i5.p1	K03015	RPB7, POLR2G; DNA-directed RNA polymerase II subunit RPB7	K09120 Genetic Information Processing	K09121 Transcription	K03020 RNA polymerase [PATH:ko03020]			PTZ00162	2381600	0	0
B1.1_TRINITY_DN3020_c1_g2_i1.p1									1995110	0	0
B1.1_TRINITY_DN3024_c0_g1_i2.p1	K13095	SF1; splicing factor 1	K09180 Brite Hierarchies	K09182 Protein families: genetic information processing	K03041 Spliceosome [BR:ko03041]			SF1-HH	20487200	0	0
B1.1_TRINITY_DN30244_c0_g1_i1.p1									1246300	0	0
B1.1_TRINITY_DN3025_c1_g1_i1.p1									17929000	3651100	0.203642
B1.1_TRINITY_DN30262_c0_g1_i1.p1								PKS_AT	63021000	0	0
B1.1_TRINITY_DN3027_c0_g1_i1.p1								Vint	16161200	48305300	2.98897
B1.1_TRINITY_DN3028_c0_g1_i1.p1	K03248	EIF3G; translation initiation factor 3 subunit G	K09180 Brite Hierarchies	K09182 Protein families: genetic information processing	K03012 Translation factors [BR:ko03012]			eIF3g	243080000	31108200	0.127975
B1.1_TRINITY_DN3028_c1_g1_i2.p1	K26076								0	651200
B1.1_TRINITY_DN3028_c3_g1_i3.p1								TLDc	1305800	10272300	7.86667
B1.1_TRINITY_DN30284_c0_g1_i1.p1	K10408	DNAH; dynein axonemal heavy chain	K09160 Human Diseases	K09164 Neurodegenerative disease				MT	2267600	0	0
B1.1_TRINITY_DN30305_c0_g1_i1.p1									5455300	1737100	0.318424
B1.1_TRINITY_DN30306_c0_g1_i1.p1	K14297	NUP98, ADAR2, NUP116; nuclear pore complex protein Nup98-Nup96	K09120 Genetic Information Processing	K09122 Translation	K03013 Nucleocytoplasmic transport [PATH:ko03013]				7803200	0	0
B1.1_TRINITY_DN30314_c0_g1_i1.p1									1445500	0	0
B1.1_TRINITY_DN30370_c0_g1_i1.p1									738270	0	0
B1.1_TRINITY_DN30375_c0_g1_i1.p1									0	4320100
B1.1_TRINITY_DN30447_c0_g1_i1.p1	K01179	E3.2.1.4; endoglucanase [EC:3.2.1.4]	K09100 Metabolism	K09101 Carbohydrate metabolism	K00500 Starch and sucrose metabolism [PATH:ko00500]			Glyco_hydro_9	0	58806000
B1.1_TRINITY_DN30456_c0_g1_i1.p1									5230700	0	0
B1.1_TRINITY_DN30483_c0_g1_i1.p1	K01179	E3.2.1.4; endoglucanase [EC:3.2.1.4]	K09100 Metabolism	K09101 Carbohydrate metabolism	K00500 Starch and sucrose metabolism [PATH:ko00500]				2004200	18890300	9.42536
B1.1_TRINITY_DN30483_c0_g1_i2.p1	K01179	E3.2.1.4; endoglucanase [EC:3.2.1.4]	K09100 Metabolism	K09101 Carbohydrate metabolism	K00500 Starch and sucrose metabolism [PATH:ko00500]			Glyco_hydro_9	13843000	267710000	19.339
B1.1_TRINITY_DN3049_c1_g1_i6.p1	K23334	RANBP9_10, RANBPM; Ran-binding protein 9/10	K09180 Brite Hierarchies	K09182 Protein families: genetic information processing	K04121 Ubiquitin system [BR:ko04121]			SPRY_RanBP9_10	27387000	0	0
B1.1_TRINITY_DN30508_c0_g1_i1.p1									9074600	0	0
B1.1_TRINITY_DN3054_c0_g1_i2.p1	K23565	EMC4, TMEM85; ER membrane protein complex subunit 4	K09180 Brite Hierarchies	K09182 Protein families: genetic information processing	K04131 Membrane trafficking [BR:ko04131]			DUF1077	16282900	0	0
B1.1_TRINITY_DN306_c0_g1_i2.p1	K04536	GNB1; guanine nucleotide-binding protein G(I)/G(S)/G(T) subunit beta-1	K09130 Environmental Information Processing	K09132 Signal transduction	K04011 MAPK signaling pathway - yeast [PATH:ko04011]			WD40	53183000	0	0
B1.1_TRINITY_DN306_c0_g2_i1.p1	K04536	GNB1; guanine nucleotide-binding protein G(I)/G(S)/G(T) subunit beta-1	K09130 Environmental Information Processing	K09132 Signal transduction	K04011 MAPK signaling pathway - yeast [PATH:ko04011]			WD40	178182000	161180000	0.904581
B1.1_TRINITY_DN3063_c0_g1_i4.p1	K09512	DNAJB6; DnaJ homolog subfamily B member 6	K09180 Brite Hierarchies	K09182 Protein families: genetic information processing	K03110 Chaperones and folding catalysts [BR:ko03110]			PRK10767	20518800	5040700	0.245663
B1.1_TRINITY_DN3063_c1_g1_i1.p1									1745900	0	0
B1.1_TRINITY_DN30663_c0_g1_i1.p1								PKS_AT	42381000	0	0
B1.1_TRINITY_DN3071_c0_g1_i6.p1	K00928	lysC; aspartate kinase [EC:2.7.2.4]	K09100 Metabolism	K09105 Amino acid metabolism	K00260 Glycine, serine and threonine metabolism [PATH:ko00260]			AAK_AK-Hom3	257620000	12710400	0.0493378
B1.1_TRINITY_DN3072_c0_g1_i1.p1								Smc	13430900	3174400	0.236351
B1.1_TRINITY_DN30776_c0_g1_i1.p1									4037700	0	0
B1.1_TRINITY_DN3078_c0_g1_i7.p1	K00850	pfkA, PFK; 6-phosphofructokinase 1 [EC:2.7.1.11]	K09100 Metabolism	K09101 Carbohydrate metabolism	K00010 Glycolysis / Gluconeogenesis [PATH:ko00010]			6PF1K_euk	45577000	0	0
B1.1_TRINITY_DN3078_c0_g2_i1.p1	K00850	pfkA, PFK; 6-phosphofructokinase 1 [EC:2.7.1.11]	K09100 Metabolism	K09101 Carbohydrate metabolism	K00010 Glycolysis / Gluconeogenesis [PATH:ko00010]			6PF1K_euk	18435300	0	0
B1.1_TRINITY_DN30793_c0_g1_i1.p1									1733500	0	0
B1.1_TRINITY_DN3090_c3_g1_i2.p1	K05236	COPA, RET1; coatomer subunit alpha	K09180 Brite Hierarchies	K09182 Protein families: genetic information processing	K04131 Membrane trafficking [BR:ko04131]			Coatomer_WDAD_alpha	187710000	0	0
B1.1_TRINITY_DN3094_c2_g1_i1.p1	K03872	ELOC, TCEB1; elongin-C	K09120 Genetic Information Processing	K09123 Folding, sorting and degradation	K04120 Ubiquitin mediated proteolysis [PATH:ko04120]			BTB_POZ_EloC	7392900	0	0
B1.1_TRINITY_DN3095_c1_g1_i1.p1	K15116	SLC25A33_36, RIM2; solute carrier family 25, member 33/36	K09180 Brite Hierarchies	K09183 Protein families: signaling and cellular processes	K02000 Transporters [BR:ko02000]			Mito_carr	16001600	0	0
B1.1_TRINITY_DN3097_c0_g1_i1.p1	K08057	CALR; calreticulin	K09120 Genetic Information Processing	K09123 Folding, sorting and degradation	K04141 Protein processing in endoplasmic reticulum [PATH:ko04141]			Calreticulin	81988000	56815600	0.692975
B1.1_TRINITY_DN3097_c1_g1_i2.p1								Endosulfine	8098800	49894200	6.16069
B1.1_TRINITY_DN3098_c0_g2_i2.p1	K06972	PITRM1, PreP, CYM1; presequence protease [EC:3.4.24.-]	K09180 Brite Hierarchies	K09181 Protein families: metabolism	K01002 Peptidases and inhibitors [BR:ko01002]			Cym1	224789000	58273000	0.259234
B1.1_TRINITY_DN31_c1_g1_i9.p1	K09494	CCT2; T-complex protein 1 subunit beta	K09180 Brite Hierarchies	K09182 Protein families: genetic information processing	K03110 Chaperones and folding catalysts [BR:ko03110]			TCP1_beta	416440000	28502500	0.0684432
B1.1_TRINITY_DN310_c0_g1_i1.p1								Stealth_CR2	10126000	0	0
B1.1_TRINITY_DN3100_c0_g1_i2.p1	K22684	MCA1; metacaspase-1 [EC:3.4.22.-]	K09180 Brite Hierarchies	K09181 Protein families: metabolism	K01002 Peptidases and inhibitors [BR:ko01002]			Peptidase_C14	301500000	15104200	0.0500968
B1.1_TRINITY_DN3106_c2_g1_i1.p1								M1_LTA4H	0	7684500
B1.1_TRINITY_DN311_c0_g2_i2.p1	K00685	ATE1; arginyl-tRNA---protein transferase [EC:2.3.2.8]	K09180 Brite Hierarchies	K09182 Protein families: genetic information processing	K03016 Transfer RNA biogenesis [BR:ko03016]				10031000	0	0
B1.1_TRINITY_DN3118_c3_g1_i1.p1	K20222	IPO5, KPNB3, RANBP5; importin-5	K09120 Genetic Information Processing	K09122 Translation	K03013 Nucleocytoplasmic transport [PATH:ko03013]				56516000	0	0
B1.1_TRINITY_DN3119_c0_g1_i1.p1	K00700	GBE1, glgB; 1,4-alpha-glucan branching enzyme [EC:2.4.1.18]	K09100 Metabolism	K09101 Carbohydrate metabolism	K00500 Starch and sucrose metabolism [PATH:ko00500]			PLN02447	14429800	0	0
B1.1_TRINITY_DN31254_c1_g1_i1.p1	K02962	RP-S17e, RPS17; small subunit ribosomal protein S17e	K09120 Genetic Information Processing	K09122 Translation	K03010 Ribosome [PATH:ko03010]			Ribosomal_S17e	2165050000	412021000	0.190306
B1.1_TRINITY_DN31260_c1_g1_i1.p1	K02938	RP-L8e, RPL8; large subunit ribosomal protein L8e	K09120 Genetic Information Processing	K09122 Translation	K03010 Ribosome [PATH:ko03010]			PTZ00180	2.0897e+09	122435200	0.0585898
B1.1_TRINITY_DN31266_c3_g1_i1.p1	K02984	RP-S3Ae, RPS3A; small subunit ribosomal protein S3Ae	K09120 Genetic Information Processing	K09122 Translation	K03010 Ribosome [PATH:ko03010]			Ribosomal_S3Ae	3.6048e+09	185439000	0.0514422
B1.1_TRINITY_DN31267_c0_g1_i1.p1									0	4155700
B1.1_TRINITY_DN31277_c0_g1_i1.p1								PksD	87233000	0	0
B1.1_TRINITY_DN313_c1_g1_i1.p1									5788600	0	0
B1.1_TRINITY_DN313_c6_g1_i1.p1									728000	0	0
B1.1_TRINITY_DN31303_c0_g1_i1.p1	K14729	FOX2; multifunctional beta-oxidation protein [EC:4.2.1.- 1.1.1.-]	K09100 Metabolism	K09101 Carbohydrate metabolism	K00640 Propanoate metabolism [PATH:ko00640]			hydroxyacyl-CoA-like_DH_SDR_c-like	256200000	1886100	0.00736183
B1.1_TRINITY_DN3131_c0_g1_i2.p1								AAR2	1325340	0	0
B1.1_TRINITY_DN31323_c0_g1_i1.p1									2103500	0	0
B1.1_TRINITY_DN31347_c0_g1_i1.p1									1224700	0	0
B1.1_TRINITY_DN3135_c0_g2_i8.p1	K08798	MARK; MAP/microtubule affinity-regulating kinase [EC:2.7.11.1]	K09180 Brite Hierarchies	K09181 Protein families: metabolism	K01001 Protein kinases [BR:ko01001]			MARK_C_like	1131000	3614700	3.19602
B1.1_TRINITY_DN3135_c1_g1_i2.p1	K00693	GYS; glycogen synthase [EC:2.4.1.11]	K09100 Metabolism	K09101 Carbohydrate metabolism	K00500 Starch and sucrose metabolism [PATH:ko00500]			GT3_GSY2-like	70619000	4802800	0.06801
B1.1_TRINITY_DN3136_c1_g1_i2.p1	K07941	ARF6; ADP-ribosylation factor 6	K09130 Environmental Information Processing	K09132 Signal transduction	K04014 Ras signaling pathway [PATH:ko04014]			Arf	12967800	0	0
B1.1_TRINITY_DN31365_c0_g1_i1.p1									701190	0	0
B1.1_TRINITY_DN31368_c0_g1_i1.p1									7568100	0	0
B1.1_TRINITY_DN31380_c0_g1_i1.p1	K14312	NUP155, NUP170, NUP157; nuclear pore complex protein Nup155	K09120 Genetic Information Processing	K09122 Translation	K03013 Nucleocytoplasmic transport [PATH:ko03013]				15070000	0	0
B1.1_TRINITY_DN31381_c0_g1_i1.p1	K05349	bglX; beta-glucosidase [EC:3.2.1.21]	K09100 Metabolism	K09101 Carbohydrate metabolism	K00500 Starch and sucrose metabolism [PATH:ko00500]			Glyco_hydro_3_C	0	35055000
B1.1_TRINITY_DN31385_c0_g1_i1.p1	K01955	carB, CPA2; carbamoyl-phosphate synthase large subunit [EC:6.3.5.5]	K09100 Metabolism	K09104 Nucleotide metabolism	K00240 Pyrimidine metabolism [PATH:ko00240]			CPSase_L_D3	21443500	0	0
B1.1_TRINITY_DN31397_c0_g1_i1.p1	K19347	SUN1_2; SUN domain-containing protein 1/2	K09180 Brite Hierarchies	K09182 Protein families: genetic information processing	K03036 Chromosome and associated proteins [BR:ko03036]			Sad1_UNC	0	3902400
B1.1_TRINITY_DN31399_c0_g1_i1.p1	K11541	URA2; carbamoyl-phosphate synthase / aspartate carbamoyltransferase [EC:6.3.5.5 2.1.3.2]	K09100 Metabolism	K09104 Nucleotide metabolism	K00240 Pyrimidine metabolism [PATH:ko00240]			CPSaseII_lrg	142271000	4398000	0.0309128
B1.1_TRINITY_DN314_c0_g2_i2.p1							CE16	fatty_acyltransferase_like	8684500	2274400	0.261892
B1.1_TRINITY_DN31419_c0_g1_i1.p2						CBM_10			0	91678000
B1.1_TRINITY_DN3144_c0_g1_i3.p1	K03037	PSMD6, RPN7; 26S proteasome regulatory subunit N7	K09120 Genetic Information Processing	K09123 Folding, sorting and degradation	K03050 Proteasome [PATH:ko03050]			RPN7	459610000	72208000	0.157107
B1.1_TRINITY_DN31459_c0_g1_i1.p1	K12854	SNRNP200, BRR2; pre-mRNA-splicing helicase BRR2 [EC:3.6.4.13]	K09120 Genetic Information Processing	K09121 Transcription	K03040 Spliceosome [PATH:ko03040]			DEXHc_Brr2_2	20366900	0	0
B1.1_TRINITY_DN3149_c0_g1_i1.p1	K15979	SND1; staphylococcal nuclease domain-containing protein 1	K09160 Human Diseases	K09161 Cancer: overview				SNc	1074610000	1.08361e+09	1.00837
B1.1_TRINITY_DN3149_c8_g1_i1.p1	K14679	TRL1; tRNA ligase [EC:6.5.1.3]	K09180 Brite Hierarchies	K09182 Protein families: genetic information processing	K03016 Transfer RNA biogenesis [BR:ko03016]			RNA_lig_T4_1	9806200	0	0
B1.1_TRINITY_DN31494_c0_g1_i1.p1	K12867	SYF1, XAB2; pre-mRNA-splicing factor SYF1	K09120 Genetic Information Processing	K09121 Transcription	K03040 Spliceosome [PATH:ko03040]				5022700	0	0
B1.1_TRINITY_DN315_c0_g1_i3.p1	K01836	PGM3; phosphoacetylglucosamine mutase [EC:5.4.2.3]	K09100 Metabolism	K09101 Carbohydrate metabolism	K00520 Amino sugar and nucleotide sugar metabolism [PATH:ko00520]			PGM3	199279000	176677000	0.886581
B1.1_TRINITY_DN315_c0_g2_i2.p1	K01836	PGM3; phosphoacetylglucosamine mutase [EC:5.4.2.3]	K09100 Metabolism	K09101 Carbohydrate metabolism	K00520 Amino sugar and nucleotide sugar metabolism [PATH:ko00520]			PGM3	562410000	429890000	0.764371
B1.1_TRINITY_DN31503_c0_g1_i1.p1								crotonase-like	37832000	0	0
B1.1_TRINITY_DN3151_c0_g1_i11.p1	K21456	GSS; glutathione synthase [EC:6.3.2.3]	K09100 Metabolism	K09105 Amino acid metabolism	K00270 Cysteine and methionine metabolism [PATH:ko00270]			GSH_synth_ATP	99353000	236660000	2.38201
B1.1_TRINITY_DN3152_c0_g2_i5.p1								CotH	64242000	220651000	3.43468
B1.1_TRINITY_DN31526_c0_g1_i1.p1	K02932	RP-L5e, RPL5; large subunit ribosomal protein L5e	K09120 Genetic Information Processing	K09122 Translation	K03010 Ribosome [PATH:ko03010]			PTZ00069	4041700	0	0
B1.1_TRINITY_DN31551_c0_g1_i1.p1									1907900	0	0
B1.1_TRINITY_DN31557_c0_g1_i1.p1									7932200	0	0
B1.1_TRINITY_DN3156_c0_g1_i3.p1								E_set_AMPKbeta_like_N	93995000	107773000	1.14658
B1.1_TRINITY_DN31577_c0_g1_i1.p1	K14297	NUP98, ADAR2, NUP116; nuclear pore complex protein Nup98-Nup96	K09120 Genetic Information Processing	K09122 Translation	K03013 Nucleocytoplasmic transport [PATH:ko03013]			Nucleoporin2	20270500	6919800	0.341373
B1.1_TRINITY_DN31588_c0_g1_i1.p1									54629000	0	0
B1.1_TRINITY_DN31599_c0_g1_i1.p1								KR	20896500	0	0
B1.1_TRINITY_DN31601_c0_g1_i1.p1									5450000	0	0
B1.1_TRINITY_DN31654_c0_g1_i1.p1	K01689	ENO, eno; enolase [EC:4.2.1.11]	K09100 Metabolism	K09101 Carbohydrate metabolism	K00010 Glycolysis / Gluconeogenesis [PATH:ko00010]			Enolase_N	0	2940800
B1.1_TRINITY_DN3166_c0_g1_i1.p1	K00931	proB; glutamate 5-kinase [EC:2.7.2.11]	K09100 Metabolism	K09105 Amino acid metabolism	K00330 Arginine and proline metabolism [PATH:ko00330]			ProB	46444000	0	0
B1.1_TRINITY_DN31696_c0_g1_i1.p1									0	6047500
B1.1_TRINITY_DN31717_c0_g1_i1.p1								Spr	52265000	1373742000	26.2842
B1.1_TRINITY_DN3172_c0_g1_i11.p1								ABCG_EPDR	21378700	0	0
B1.1_TRINITY_DN3172_c0_g1_i7.p1								3a01204	28026000	0	0
B1.1_TRINITY_DN31728_c0_g1_i1.p1									814040	1982300	2.43514
B1.1_TRINITY_DN31731_c0_g1_i1.p1	K14698	irtA, ybtP; ATP-binding cassette, subfamily B, bacterial IrtA/YbtP [EC:7.-.-.-]	K09130 Environmental Information Processing	K09131 Membrane transport	K02010 ABC transporters [PATH:ko02010]			ABCC_MsbA	55189000	0	0
B1.1_TRINITY_DN31758_c0_g1_i1.p1									74838000	0	0
B1.1_TRINITY_DN3178_c1_g1_i2.p1	K01951	guaA, GMPS; GMP synthase (glutamine-hydrolysing) [EC:6.3.5.2]	K09100 Metabolism	K09104 Nucleotide metabolism	K00230 Purine metabolism [PATH:ko00230]			guaA	22118000	30139000	1.36265
B1.1_TRINITY_DN3182_c0_g1_i12.p1									91916000	18127600	0.197219
B1.1_TRINITY_DN3182_c0_g1_i2.p2									27418000	3137700	0.114439
B1.1_TRINITY_DN3183_c0_g1_i1.p1	K10408	DNAH; dynein axonemal heavy chain	K09160 Human Diseases	K09164 Neurodegenerative disease				DHC_N1	3584200	0	0
B1.1_TRINITY_DN3183_c1_g2_i2.p1	K18660	ACSF3; malonyl-CoA/methylmalonyl-CoA synthetase [EC:6.2.1.-]	K09100 Metabolism	K09103 Lipid metabolism	K00061 Fatty acid biosynthesis [PATH:ko00061]			MCS	7235600	0	0
B1.1_TRINITY_DN31830_c0_g1_i1.p1									0	10990000
B1.1_TRINITY_DN31835_c0_g1_i1.p1	K09403	FOXJ2_3; forkhead box protein J2/3	K09180 Brite Hierarchies	K09182 Protein families: genetic information processing	K03000 Transcription factors [BR:ko03000]			Forkhead	4762300	2510260	0.527111
B1.1_TRINITY_DN3184_c0_g2_i1.p1	K11836	USP5_13, UBP14; ubiquitin carboxyl-terminal hydrolase 5/13 [EC:3.4.19.12]	K09180 Brite Hierarchies	K09181 Protein families: metabolism	K01002 Peptidases and inhibitors [BR:ko01002]			Peptidase_C19B	2994700	0	0
B1.1_TRINITY_DN31853_c0_g1_i1.p1								vWA_BABAM1	1671200	0	0
B1.1_TRINITY_DN3186_c0_g1_i2.p1	K12623	LSM4; U6 snRNA-associated Sm-like protein LSm4	K09120 Genetic Information Processing	K09121 Transcription	K03040 Spliceosome [PATH:ko03040]			LSm4	0	1607000
B1.1_TRINITY_DN3188_c1_g2_i3.p1	K14835	NOP2; 25S rRNA (cytosine2870-C5)-methyltransferase [EC:2.1.1.310]	K09180 Brite Hierarchies	K09182 Protein families: genetic information processing	K03009 Ribosome biogenesis [BR:ko03009]				31783000	0	0
B1.1_TRINITY_DN3188_c2_g3_i3.p1	K11128	GAR1, NOLA1; H/ACA ribonucleoprotein complex subunit 1	K09120 Genetic Information Processing	K09122 Translation	K03008 Ribosome biogenesis in eukaryotes [PATH:ko03008]			Gar1	170010000	42430100	0.249574
B1.1_TRINITY_DN31884_c0_g1_i1.p1	K11584	PPP2R5; serine/threonine-protein phosphatase 2A regulatory subunit B'	K09120 Genetic Information Processing	K09122 Translation	K03015 mRNA surveillance pathway [PATH:ko03015]				9192300	0	0
B1.1_TRINITY_DN319_c2_g1_i3.p1	K14823	EBP2, EBNA1BP2; rRNA-processing protein EBP2	K09180 Brite Hierarchies	K09182 Protein families: genetic information processing	K03009 Ribosome biogenesis [BR:ko03009]			Ebp2	36329000	0	0
B1.1_TRINITY_DN3190_c0_g1_i2.p1									621630	2122400	3.41425
B1.1_TRINITY_DN3191_c0_g1_i1.p1	K04097	HPGDS; prostaglandin-H2 D-isomerase / glutathione transferase [EC:5.3.99.2 2.5.1.18]	K09100 Metabolism	K09103 Lipid metabolism	K00590 Arachidonic acid metabolism [PATH:ko00590]			GST_N_Sigma_like	690410000	422500000	0.611955
B1.1_TRINITY_DN3191_c2_g2_i1.p1	K00286	proC; pyrroline-5-carboxylate reductase [EC:1.5.1.2]	K09100 Metabolism	K09105 Amino acid metabolism	K00330 Arginine and proline metabolism [PATH:ko00330]			PRK11880	100281000	102532000	1.02245
B1.1_TRINITY_DN3191_c5_g1_i1.p1	K02915	RP-L34e, RPL34; large subunit ribosomal protein L34e	K09120 Genetic Information Processing	K09122 Translation	K03010 Ribosome [PATH:ko03010]			Ribosomal_L34e	893930000	220095000	0.246211
B1.1_TRINITY_DN3192_c1_g2_i3.p1									0	14687000
B1.1_TRINITY_DN31968_c0_g1_i1.p1								MYSc_Myo17	21643800	0	0
B1.1_TRINITY_DN31979_c0_g1_i1.p1									66283000	205944000	3.10704
B1.1_TRINITY_DN31988_c0_g1_i1.p1	K00264	GLT1; glutamate synthase (NADH) [EC:1.4.1.14]	K09100 Metabolism	K09102 Energy metabolism	K00910 Nitrogen metabolism [PATH:ko00910]			GATase_2	49852000	0	0
B1.1_TRINITY_DN3202_c10_g1_i1.p1	K02930	RP-L4e, RPL4; large subunit ribosomal protein L4e	K09120 Genetic Information Processing	K09122 Translation	K03010 Ribosome [PATH:ko03010]			PTZ00428	6.7765e+09	257762000	0.0380376
B1.1_TRINITY_DN3202_c4_g1_i2.p1	K03030	PSMD14, RPN11, POH1; 26S proteasome regulatory subunit N11	K09120 Genetic Information Processing	K09123 Folding, sorting and degradation	K03050 Proteasome [PATH:ko03050]			MPN_RPN11_CSN5	348410000	22135000	0.0635315
B1.1_TRINITY_DN3205_c0_g1_i1.p1	K04552	UBE2L3, UBCH7; ubiquitin-conjugating enzyme E2 L3 [EC:2.3.2.23]	K09120 Genetic Information Processing	K09123 Folding, sorting and degradation	K04120 Ubiquitin mediated proteolysis [PATH:ko04120]			UBCc	12488300	1656100	0.132612
B1.1_TRINITY_DN3206_c1_g2_i5.p1	K11713	PGTB1; geranylgeranyl transferase type-1 subunit beta [EC:2.5.1.59]	K09180 Brite Hierarchies	K09181 Protein families: metabolism	K01006 Prenyltransferases [BR:ko01006]			GGTase-I	19618100	1259600	0.064206
B1.1_TRINITY_DN3211_c0_g1_i3.p1	K24523	CPNE5_8_9; copine 5/8/9	K09180 Brite Hierarchies	K09183 Protein families: signaling and cellular processes	K04990 Domain-containing proteins not elsewhere classified [BR:ko04990]			vWA_copine_like	155755000	0	0
B1.1_TRINITY_DN3212_c0_g1_i2.p1	K12881	THOC4, ALY; THO complex subunit 4	K09120 Genetic Information Processing	K09121 Transcription	K03040 Spliceosome [PATH:ko03040]			RRM_THOC4	242420000	63283000	0.261047
B1.1_TRINITY_DN3212_c2_g1_i2.p1	K12160	SUMO, SMT3; small ubiquitin-related modifier	K09120 Genetic Information Processing	K09122 Translation	K03013 Nucleocytoplasmic transport [PATH:ko03013]			Ubl_Smt3_like	15084000	274648000	18.2079
B1.1_TRINITY_DN3212_c4_g1_i2.p1									17905100	0	0
B1.1_TRINITY_DN3218_c0_g2_i1.p1	K16945	CDC11; cell division control protein 11	K09180 Brite Hierarchies	K09183 Protein families: signaling and cellular processes	K04812 Cytoskeleton proteins [BR:ko04812]			CDC_Septin	44967000	0	0
B1.1_TRINITY_DN3218_c2_g1_i2.p1	K17805	PAM16, TIM16; mitochondrial import inner membrane translocase subunit TIM16	K09180 Brite Hierarchies	K09182 Protein families: genetic information processing	K03029 Mitochondrial biogenesis [BR:ko03029]			Pam16	58819000	0	0
B1.1_TRINITY_DN323_c2_g2_i1.p1									976540	0	0
B1.1_TRINITY_DN3230_c1_g1_i1.p1	K03178	UBE1, UBA1; ubiquitin-activating enzyme E1 [EC:6.2.1.45]	K09120 Genetic Information Processing	K09123 Folding, sorting and degradation	K04120 Ubiquitin mediated proteolysis [PATH:ko04120]			Ube1_repeat1	433780000	74437000	0.171601
B1.1_TRINITY_DN32362_c0_g1_i1.p1	K05658	ABCB1, CD243; ATP-binding cassette, subfamily B (MDR/TAP), member 1 [EC:7.6.2.2]	K09130 Environmental Information Processing	K09131 Membrane transport	K02010 ABC transporters [PATH:ko02010]			ABC_MTABC3_MDL1_MDL2	49587000	2046500	0.0412709
B1.1_TRINITY_DN3246_c1_g1_i3.p1	K06221	dkgA; 2,5-diketo-D-gluconate reductase A [EC:1.1.1.346]	K09180 Brite Hierarchies	K09191 Unclassified: metabolism	K99980 Enzymes with EC numbers			AKR_AKR5F1	0	64314700
B1.1_TRINITY_DN325_c0_g1_i1.p1								cinA	129493000	3640400	0.0281127
B1.1_TRINITY_DN3253_c0_g1_i1.p1	K08838	STK24_25_MST4; serine/threonine-protein kinase 24/25/MST4 [EC:2.7.11.1]	K09180 Brite Hierarchies	K09181 Protein families: metabolism	K01001 Protein kinases [BR:ko01001]			STKc_MST3_like	2121300	0	0
B1.1_TRINITY_DN3254_c0_g1_i2.p1								GST_C_AaRS_like	306590000	0	0
B1.1_TRINITY_DN3254_c1_g1_i1.p1	K11131	DKC1, NOLA4, CBF5; H/ACA ribonucleoprotein complex subunit 4 [EC:5.4.99.-]	K09120 Genetic Information Processing	K09122 Translation	K03008 Ribosome biogenesis in eukaryotes [PATH:ko03008]			CBF5	632420000	0	0
B1.1_TRINITY_DN3254_c2_g1_i3.p1	K14565	NOP58; nucleolar protein 58	K09120 Genetic Information Processing	K09122 Translation	K03008 Ribosome biogenesis in eukaryotes [PATH:ko03008]			SIK1	731030000	454250	0.000621384
B1.1_TRINITY_DN3257_c0_g1_i1.p1							GH13_28+CBM26	AmyAc_bac1_AmyA	0	78137000
B1.1_TRINITY_DN326_c0_g1_i2.p1									0	5390500
B1.1_TRINITY_DN326_c1_g2_i12.p1	K12176	COPS2, CSN2, TRIP15; COP9 signalosome complex subunit 2	K09180 Brite Hierarchies	K09182 Protein families: genetic information processing	K04121 Ubiquitin system [BR:ko04121]			RPN6	10590300	0	0
B1.1_TRINITY_DN3265_c0_g1_i1.p1	K12316	GAA; lysosomal alpha-glucosidase [EC:3.2.1.20]	K09100 Metabolism	K09101 Carbohydrate metabolism	K00052 Galactose metabolism [PATH:ko00052]			GH31_MGAM_SI_GAA	7646200	0	0
B1.1_TRINITY_DN327_c0_g1_i2.p1								Smc	6052200	9263200	1.53055
B1.1_TRINITY_DN3271_c1_g1_i7.p1	K01537	ATP2C; P-type Ca2+ transporter type 2C [EC:7.2.2.10]	K09180 Brite Hierarchies	K09191 Unclassified: metabolism	K99980 Enzymes with EC numbers			P-type_ATPase_Ca_PMCA-like	17827200	5059300	0.283797
B1.1_TRINITY_DN3271_c1_g2_i2.p1	K01537	ATP2C; P-type Ca2+ transporter type 2C [EC:7.2.2.10]	K09180 Brite Hierarchies	K09191 Unclassified: metabolism	K99980 Enzymes with EC numbers			ATPase-IIB_Ca	3.0389e+09	103003000	0.0338948
B1.1_TRINITY_DN3282_c0_g2_i1.p1	K01079	serB, PSPH; phosphoserine phosphatase [EC:3.1.3.3]	K09100 Metabolism	K09102 Energy metabolism	K00680 Methane metabolism [PATH:ko00680]			HAD_PSP	51942000	3668400	0.0706249
B1.1_TRINITY_DN3282_c0_g2_i2.p1	K01079	serB, PSPH; phosphoserine phosphatase [EC:3.1.3.3]	K09100 Metabolism	K09102 Energy metabolism	K00680 Methane metabolism [PATH:ko00680]			HAD_PSP	227551000	18310300	0.0804668
B1.1_TRINITY_DN3283_c1_g1_i1.p1	K01251	E3.3.1.1, ahcY; adenosylhomocysteinase [EC:3.3.1.1]	K09100 Metabolism	K09105 Amino acid metabolism	K00270 Cysteine and methionine metabolism [PATH:ko00270]			AdoHcyase	3.5727e+09	9.8628e+09	2.7606
B1.1_TRINITY_DN3289_c0_g2_i1.p1	K11718	HUGT; UDP-glucose:glycoprotein glucosyltransferase [EC:2.4.1.-]	K09120 Genetic Information Processing	K09123 Folding, sorting and degradation	K04141 Protein processing in endoplasmic reticulum [PATH:ko04141]			Glyco_transf_24	12320500	0	0
B1.1_TRINITY_DN3294_c0_g1_i1.p1									1849300	3657800	1.97794
B1.1_TRINITY_DN3298_c0_g1_i9.p1	K14293	KPNB1, IPO1; importin subunit beta-1	K09120 Genetic Information Processing	K09122 Translation	K03013 Nucleocytoplasmic transport [PATH:ko03013]			KAP95	9182500	0	0
B1.1_TRINITY_DN3298_c0_g2_i3.p1	K14293	KPNB1, IPO1; importin subunit beta-1	K09120 Genetic Information Processing	K09122 Translation	K03013 Nucleocytoplasmic transport [PATH:ko03013]			KAP95	74301000	0	0
B1.1_TRINITY_DN3302_c0_g1_i1.p1									1.77553e+09	5.2678e+09	2.96689
B1.1_TRINITY_DN3311_c0_g1_i2.p1	K03239	EIF2B1; translation initiation factor eIF-2B subunit alpha	K09160 Human Diseases	K09172 Infectious disease: viral				IF-2B	12386000	0	0
B1.1_TRINITY_DN3318_c0_g1_i1.p1								Ric8	9311000	0	0
B1.1_TRINITY_DN3318_c1_g1_i3.p1									37248000	0	0
B1.1_TRINITY_DN3318_c3_g1_i1.p1									2866100	0	0
B1.1_TRINITY_DN3319_c0_g1_i4.p1								Ncstrn_small	6238100	0	0
B1.1_TRINITY_DN332_c0_g1_i4.p1	K02149	ATPeV1D, ATP6M; V-type H+-transporting ATPase subunit D	K09100 Metabolism	K09102 Energy metabolism	K00190 Oxidative phosphorylation [PATH:ko00190]			ATP-synt_D	878700000	173821000	0.197816
B1.1_TRINITY_DN332_c0_g2_i1.p1									2071400	0	0
B1.1_TRINITY_DN332_c1_g1_i5.p1									8442200	14545000	1.72289
B1.1_TRINITY_DN3326_c0_g3_i2.p1									0	18555000
B1.1_TRINITY_DN3327_c0_g1_i2.p1	K07200	PRKAG; 5'-AMP-activated protein kinase, regulatory gamma subunit	K09130 Environmental Information Processing	K09132 Signal transduction	K04371 Apelin signaling pathway [PATH:ko04371]				39607000	0	0
B1.1_TRINITY_DN3332_c0_g1_i1.p1							CE4	CE4_ClCDA_like	13166900	516410000	39.2203
B1.1_TRINITY_DN3333_c0_g1_i4.p1									13628300	0	0
B1.1_TRINITY_DN3333_c1_g1_i3.p1	K05610	UCHL5, UCH37; ubiquitin carboxyl-terminal hydrolase L5 [EC:3.4.19.12]	K09180 Brite Hierarchies	K09181 Protein families: metabolism	K01002 Peptidases and inhibitors [BR:ko01002]			Peptidase_C12_UCH37_BAP1	118848000	51820000	0.436019
B1.1_TRINITY_DN3339_c1_g1_i2.p2									13950500	0	0
B1.1_TRINITY_DN3339_c2_g1_i1.p1	K20031	ZDHHC6; palmitoyltransferase ZDHHC6 [EC:2.3.1.225]	K09180 Brite Hierarchies	K09182 Protein families: genetic information processing	K04131 Membrane trafficking [BR:ko04131]			DHHC	2966400	0	0
B1.1_TRINITY_DN3339_c3_g3_i1.p1									2362800	0	0
B1.1_TRINITY_DN3339_c4_g1_i1.p1	K00700	GBE1, glgB; 1,4-alpha-glucan branching enzyme [EC:2.4.1.18]	K09100 Metabolism	K09101 Carbohydrate metabolism	K00500 Starch and sucrose metabolism [PATH:ko00500]		GH13_8	PLN02447	1497270000	29355900	0.0196063
B1.1_TRINITY_DN3339_c4_g1_i13.p1	K00700	GBE1, glgB; 1,4-alpha-glucan branching enzyme [EC:2.4.1.18]	K09100 Metabolism	K09101 Carbohydrate metabolism	K00500 Starch and sucrose metabolism [PATH:ko00500]		GH13_8	PLN02447	125569000	6058500	0.0482484
B1.1_TRINITY_DN3340_c1_g1_i1.p1	K13501	TRP1; anthranilate synthase / indole-3-glycerol phosphate synthase / phosphoribosylanthranilate isomerase [EC:4.1.3.27 4.1.1.48 5.3.1.24]	K09100 Metabolism	K09105 Amino acid metabolism	K00400 Phenylalanine, tyrosine and tryptophan biosynthesis [PATH:ko00400]			PRK05670	192068000	21364200	0.111232
B1.1_TRINITY_DN3341_c0_g1_i3.p1								RRM_PARN	19626200	2760900	0.140674
B1.1_TRINITY_DN3370_c1_g1_i1.p1	K01619	deoC, DERA; deoxyribose-phosphate aldolase [EC:4.1.2.4]	K09100 Metabolism	K09101 Carbohydrate metabolism	K00030 Pentose phosphate pathway [PATH:ko00030]			DeoC	7354400	28048700	3.81387
[truncated: 5,099 more rows]
